# Supplementary material for: Asymmetric C(sp3)-H/C(Ar) coupling reactions. Highly enantio-enriched indolines via regiodivergent reaction of a racemic mixture
Source: Royal Society of Chemistry journal article supplement (doi:10.1039/c2sc20111a), 2012-01-01
Supplement: c2sc20111a.pdf [file c2sc20111a.pdf]

# Asymmetric C(sp<sup>3</sup>)-H/C(Ar) Coupling Reactions. Highly Enantioenriched Indolines via Regiodivergent Reaction of a Racemic Mixture

Dmitry Katayev, Masafumi Nakanishi, Thomas Bürgi and E. Peter Kündig\*

*\*University of Geneva, Department of Chemistry  
30 Quai Ernest Ansermet, CH-1211, Geneva 4, Switzerland  
E-mail: peter.kundig@unige.ch*

## Electronic Supplementary Information

### Index

|      |                                                                                                        |       |
|------|--------------------------------------------------------------------------------------------------------|-------|
| 1.1  | General Techniques and Chemicals-----                                                                  | 2     |
| 1.2  | Synthesis of <i>N</i> -alkyl-2-bromoaniline by Reductive Amination -----                               | 2     |
| 1.3  | Synthesis of <i>N</i> -alkyl-2-bromoaniline by Pd cat. Amination -----                                 | 3     |
| 1.4  | Synthesis, spectra, analysis of substrates <b>1</b> and <b>6</b> -----                                 | 3-31  |
| 1.5  | Racemic Synthesis of Indolines <b>2</b> and <b>7</b> -----                                             | 31    |
| 1.6  | Asymmetric Synthesis of Indolines <b>2</b> , <b>7</b> , and <b>8</b> -----                             | 32    |
| 1.7  | Synthesis, spectra, analysis of substrates <b>2a-d</b> , <b>7a-g</b> , and <b>8a-g</b> -----           | 33-82 |
| 1.8  | Preparation of ( <i>S</i> )- and ( <i>R</i> )-1-phenylpropan-2-amine-----                              | 83    |
| 1.9  | Synthesis of ( <i>R</i> )- and ( <i>S</i> )- <b>6g</b> -----                                           | 85    |
| 1.10 | Synthesis of ( <i>S</i> )- <b>7f</b> -----                                                             | 87    |
| 1.11 | Synthesis of ( <i>2S,3R</i> )- <b>8f</b> -----                                                         | 89    |
| 1.12 | Synthesis of ( <i>R</i> )- <b>7g</b> -----                                                             | 92    |
| 1.13 | Synthesis of ( <i>2R,3S</i> )- <b>8g</b> -----                                                         | 94    |
| 1.14 | Removal of N-protecting group in ( <i>2R,3S</i> )- <b>8g</b> to give ( <i>2R,3S</i> )- <b>9g</b> ----- | 96    |
| 1.15 | IR and vibrational circular dichroism (VCD) analysis of <b>2b</b> and <b>8g</b> -----                  | 99    |
| 1.16 | References-----                                                                                        | 108   |

## 1.1 General Techniques and Chemicals:

Chemicals were purchased from Aldrich, Fluka, Acros, Alfa or Aesar and used without further purification.

*N*-alkyl-2-bromoaniline<sup>[1-2]</sup> and methyl *N*-alkyl-2-bromophenyl carbamate<sup>[3]</sup> were prepared by literature procedures. Solvents were purified by filtration on drying columns using a Solvtec© system. Reactions and manipulations involving organometallic or moisture sensitive compounds were carried out under nitrogen and glassware was further dried by heating under vacuum as necessary. F.c. (FC): silica gel 60 (40µm). Molecular sieve 4Å was used without activation. Analysis with HPLC was performed using an Agilent 1100 series chromatograph with a JASCO PU-980 pump and Agilent 1100 Series detection system.

<sup>1</sup>H, <sup>13</sup>C-NMR spectra were recorded on Bruker AMX-500, AMX-400 or AMX-300 MHz; δ-in ppm, pattern abbreviation: broad (*brd*), quartet (*q*), quintet (*quint*), multiplet (*m*). Fourier transform (FT) spectrometers using an internal deuterium lock. Chemical shifts are quoted in parts per million (ppm) downfield of tetramethylsilane. Infrared spectra were recorded on a Perkin-Elmer Spectrum One photometer. HRMS analyses were measured on a VG analytical 7070E instrument. Optical rotations were measured at 20 °C on a Perkin Elmer 241 polarimeter using a quartz cell (*l* = 10 cm) with a Na high-pressure lamp ( $\lambda$  = 589 nm). Melting points were determined on a Büchi M-560 apparatus and are uncorrected.

### Starting Materials:

Mesitylene was distilled over CaH<sub>2</sub> under nitrogen. Dry xylenes, benzene, cesium carbonate, cesium pivalate, pivalic acid, molecular sieves 4Å, methyl-, ethyl-, benzyl-chloroformate, alkanone, (L)-(-)- and (D)-(+)- norephedrine and 2-bromoaniline were purchased from Sigma-Aldrich, Fluka, Alfa Aesar or Acros. The substrates **1** and *N*-alkylanilines were prepared by general procedure or previously reported procedure.<sup>[1-2]</sup>

### 1.2 Representative procedure 1 (RP1) for *N*-alkyl-2-bromoaniline by reductive amination:<sup>[1]</sup>

2-Bromoaniline (1.7 g, 10 mmol), molecular sieves 4Å (2.5 g) and alkanone (20-50 mmol, 2-5 equivs.) was dissolved in benzene (50 mL). The reaction mixture was stirred under reflux in a Dean-Stark apparatus for 4 days and then filtered through celite and washed with diethyl ether.

The filtrate was evaporated by rotary evaporator and dried under vacuum. The crude imine product was dissolved in absolute methanol (50 mL) and NaBH<sub>4</sub> (1.14 g, 30 mmol, 3 equivs.) was added slowly under nitrogen. The reaction mixture was stirred for 2 hours at room temperature (r.t.). 1N-KOH aq. (50 mL) was added and the mixture was extracted with dichloromethane (3×30 mL). The organic phase was dried over Na<sub>2</sub>SO<sub>4</sub>. After filtration and evaporation, the residue was purified by f.c.(f.c.) (silica gel; diethyl ether/pentane as eluent) affording *N*-alkyl-*o*-bromoaniline.

### Representative procedure 2 (RP2) for palladium-catalyzed *N*-arylation.<sup>[2]</sup>

Pd<sub>2</sub>(dba)<sub>3</sub> (2 mol%), *rac*-BINAP (6 mol%), and sodium *tert*-butoxide (1.4 equivs.) were sequentially filled into a Schlenk flask. After the flask was evacuated and backfilled with nitrogen, dry toluene, amine (1.1 equivs.) and 1,2-dibromobenzene (1 equiv.) was added under nitrogen. The resulting reaction mixture was stirred at 110 °C in a Schlenk tube behind a protection shield for 24 hours. The reaction mixture was cooled to r.t. (r.t) and diluted with ethylacetate followed by filtration through the pad of celite. The filtrate was evaporated by rotary evaporator and the volatiles were removed under vacuum. The residue was purified by f.c. (silica gel; diethyl ether/pentane as eluent) to afford 2-bromo-*N*-alkylaniline.

2-Bromo-*N*-isopropylaniline:<sup>[3]</sup>

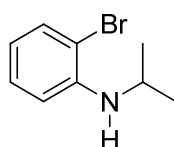

Synthesized by RP1, colorless oil, 26% yield, <sup>1</sup>H NMR (400 MHz, CDCl<sub>3</sub>): 1.24 (d, *J* = 6.4, 6H), 3.64 (oct, *J* = 6.4, 1H), 4.13 (d, *J* = 6.8 Hz, 1H), 6.51 (td, *J* = 7.6, 1.6 Hz, 1H), 6.63 (dd, *J* = 7.6, 1.6Hz, 1H), 7.15 (dd, *J* = 7.6, 1.6 Hz, 1H), 7.39 (dd, *J* = 8, 1.6 Hz, 1H). <sup>13</sup>C NMR (100 MHz): δ = 23.1, 44.5, 110.0, 112.0, 117.4, 128.6, 132.7, 144.4. IR (neat): ν = 736, 1017, 1112, 1153, 1175, 1285, 1318, 1366, 1384, 1425, 1462, 1506, 1595, 2929, 2966, 3405 cm<sup>-1</sup>; HRMS calcd. for C<sub>9</sub>H<sub>12</sub>NBr 213.0153, found 213.0150.

2-Bromo-*N*-(pentan-3-yl)aniline:<sup>[1]</sup>

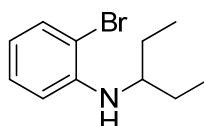

Synthesized by RP1, colorless oil, 32% yield,  $^1\text{H}$  NMR (400 MHz,  $\text{CDCl}_3$ ): 0.92 (t,  $J = 7.6$  Hz, 3H), 1.44-1.68 (m, 4H), 3.20-3.32 (m, 1H), 4.12 (d,  $J = 8$  Hz, 1H), 6.49 (td,  $J = 7.6, 1.2$  Hz, 1H), 6.60 (dd,  $J = 8.4, 1.2$  Hz, 1H), 7.12 (td,  $J = 7.4, 1.2$  Hz, 1H), 7.39 (dd,  $J = 8, 1.6$  Hz, 1H).  $^{13}\text{C}$  NMR (100 MHz):  $\delta = 10.3, 26.9, 55.8, 110.0, 111.8, 117.1, 128.6, 132.7, 145.1$ . IR (neat):  $\nu = 736, 1016, 1163, 1237, 1286, 1321, 1381, 1427, 1459, 1507, 1594, 2875, 2931, 2963, 3410\text{ cm}^{-1}$ ; HRMS calcd. for  $\text{C}_{11}\text{H}_{16}\text{NBr}$  241.0466, found 241.0470.

2-Bromo-*N*-(heptan-4-yl)aniline:

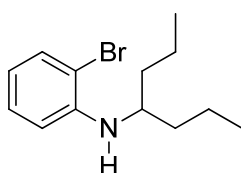

Synthesized by RP1, colorless oil, 11% yield,  $^1\text{H}$  NMR (400 MHz,  $\text{CDCl}_3$ ): 0.91 (t,  $J = 7.6$  Hz, 3H), 1.25-1.50 (m, 8H), 3.32-3.44 (m, 1H), 4.09 (d,  $J = 8.4$  Hz, 1H), 6.48 (td,  $J = 7.6, 1.6$  Hz, 1H), 6.60 (dd,  $J = 8.4, 1.6$  Hz, 1H), 7.12 (td,  $J = 7.6, 1.6$  Hz, 1H), 7.38 (dd,  $J = 8, 1.6$  Hz, 1H).  $^{13}\text{C}$  NMR (100 MHz):  $\delta = 14.4, 19.3, 37.3, 52.8, 109.9, 111.6, 116.9, 128.6, 132.7, 145.0$ . MS (ESI, 70 eV):  $m/z$  (%) = 270 ( $\text{M}+\text{H}$ ) $^+$ ; IR (neat):  $\nu = 1016, 1184, 1114, 1162, 1287, 1030, 1378, 1427, 1458, 1508, 1594, 2870, 2930, 2957, 3406\text{ cm}^{-1}$ ; HRMS calcd. for  $\text{C}_{13}\text{H}_{20}\text{BrN}$  270.0851, found 270.0863.

2-Bromo-*N*-(1,3-diphenylpropan-2-yl)aniline:

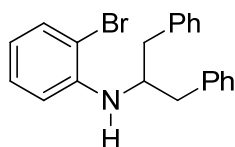

Synthesized by RP1, colorless oil, 5% yield,  $^1\text{H}$  NMR (400 MHz,  $\text{CDCl}_3$ ): 2.84 (qd,  $J = 14, 6$  Hz, 4H), 3.95 (quint,  $J = 6$  Hz, 1H), 4.25-4.65 (brd, 1H), 6.51 (td,  $J = 7.6, 1.6$  Hz, 1H), 6.67 (dd,  $J = 8, 1.2$  Hz, 1H), 7.13 (dd,  $J = 7.2, 1.2$  Hz, 1H), 7.16-7.24 (m, 6H), 7.25-7.33 (m, 4H), 7.38 (dd,  $J = 7.6, 1.6$  Hz, 1H).  $^{13}\text{C}$  NMR (100 MHz):  $\delta = 39.9, 55.3, 110.4, 111.8, 117.7, 126.7, 128.6, 128.7, 129.7, 132.8, 138.4, 144.0$ . MS (ESI, 70 eV):  $m/z$  (%) = 366 ( $\text{M}+\text{H}$ ) $^+$ ; IR

(neat):  $\nu = 737, 1017, 1088, 1126, 1286, 1320, 1429, 1454, 1495, 1594, 2922, 3026, 3062, 3400 \text{ cm}^{-1}$ ; HRMS calcd. for  $\text{C}_{12}\text{H}_{16}\text{NBr}$  366.0851, found 366.0849

2-Bromo-*N*-(sec-butyl)aniline: <sup>[3]</sup>

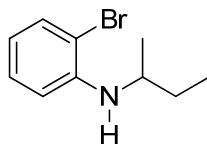

Synthesized by RP1, colorless oil, 66% yield, <sup>1</sup>H NMR (400 MHz,  $\text{CDCl}_3$ ): 0.95 (t,  $J = 7.6$  Hz, 1H), 1.20 (t,  $J = 6.4$  Hz, 1H), 1.45-1.67 (m, 2H), 3.32-3.47 (m, 1H), 4.13 (d,  $J = 6.8$  Hz, 1H), 6.50 (td,  $J = 8, 1.6$  Hz, 1H), 6.61 (dd,  $J = 8, 0.8$  Hz, 1H), 7.14 (td,  $J = 7.6, 0.8$  Hz, 1H), 7.39 (dd,  $J = 8, 1.6$  Hz, 1H).

2-Bromo-*N*-(pentan-2-yl)aniline:

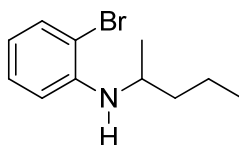

Synthesized by RP1, colorless oil, 45% yield, <sup>1</sup>H NMR (400 MHz,  $\text{CDCl}_3$ ): 0.91 (t,  $J = 7.2$  Hz, 1H), 1.19 (d,  $J = 6.4$  Hz, 1H), 1.31-1.65 (m, 4H), 3.40-3.56 (m, 1H), 3.95-4.35 (brd, 1H), 6.50 (td,  $J = 7.6, 1.6$  Hz, 1H), 6.61 (dd,  $J = 8.4, 1.2$  Hz, 1H), 7.13 (dd,  $J = 7.2, 1.2$  Hz, 1H), 7.39 (dd,  $J = 8, 1.6$  Hz, 1H). <sup>13</sup>C NMR (100 MHz):  $\delta = 14.3, 19.5, 20.9, 39.4, 48.6, 110.0, 111.8, 117.3, 128.6, 132.7, 144.6$ . MS (ESI, 70 eV):  $m/z$  (%) = 242 ( $\text{M}+\text{H}$ )<sup>+</sup>; IR (neat):  $\nu = 739, 1018, 1048, 1112, 1166, 1286, 1321, 1378, 1426, 1459, 1508, 1595, 2871, 2930, 2960, 3408 \text{ cm}^{-1}$ ; ESI-HRMS calcd. for  $\text{C}_{11}\text{H}_{17}\text{BrN}$  242.0538, found 242.0534.

2-Bromo-*N*-(4-methylpentan-2-yl)aniline:

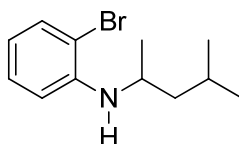

Synthesized by RP2, Colorless oil, 59% yield, <sup>1</sup>H NMR (400 MHz,  $\text{CDCl}_3$ ): 0.92 (t,  $J = 7.2$  Hz, 1H), 1.19 (d,  $J = 6, \text{ Hz}$ , 3H), 1.31-1.65 (m, 4H), 3.40-3.55 (m, 1H), 3.90-4.40 (brd, 1H),

6.50 (td,  $J = 7.6, 1.6$  Hz, 1H), 6.61 (dd,  $J = 8.4, 1.6$  Hz, 1H), 7.13 (dd,  $J = 7.6, 1.6$  Hz, 1H), 7.39 (dd,  $J = 8, 1.6$  Hz, 1H).  $^{13}\text{C}$  NMR (100 MHz):  $\delta = 21.2, 22.8, 23.1, 25.3, 46.9, 46.9, 110.0, 111.7, 117.2, 128.6, 132.7, 144.6$ . MS (EI, 70 eV):  $m/z$  (%) = 255 (M) $^+$ ; IR (neat):  $\nu = 737, 1017, 1114, 1166, 1287, 1320, 1367, 1425, 1459, 1507, 1594, 2869, 2926, 2957, 3407$   $\text{cm}^{-1}$ ; EI-HRMS calcd. for  $\text{C}_{12}\text{H}_{18}\text{BrN}$  255.0623, found 255.0621.

2-bromo-*N*-(1-cyclohexylpropan-2-yl)aniline:

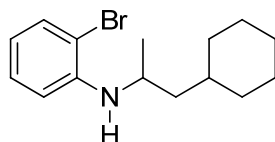

Synthesized by RP1, colorless oil, 17% yield,  $^1\text{H}$  NMR (400 MHz,  $\text{CDCl}_3$ ): 0.82-1.03 (m, 2H), 1.06-1.56 (m, 6H), 1.18 (d,  $J = 6.4$ , Hz, 3H), 1.57-1.81 (m, 5H), 3.50-3.64 (m, 1H), 3.92-4.30 (brd, 1H), 6.50 (td,  $J = 7.6, 1.2$  Hz, 1H), 6.62 (dd,  $J = 8, 1.2$  Hz, 1H), 7.14 (d,  $J = 7.8, 1.2$  Hz, 1H), 7.39 (dd,  $J = 8, 1.6$  Hz, 1H).  $^{13}\text{C}$  NMR (100 MHz):  $\delta = 26.5, 26.8, 33.6, 33.8, 34.8, 45.4, 46.2, 110.1, 111.8, 117.2, 128.6, 132.7, 144.6$ . IR (neat):  $\nu = 736, 1017, 1162, 1212, 1242, 1286, 1320, 1377, 1425, 1448, 1507, 1595, 2848, 2920, 3409$   $\text{cm}^{-1}$ ; ESI-HRMS calcd. for  $\text{C}_{15}\text{H}_{23}\text{BrN}$  296.1008, found 296.1014.

2-Bromo-*N*-(3-methylbutan-2-yl)aniline:

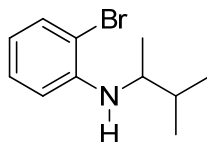

Synthesized by RP2, colorless oil, 62% yield,  $^1\text{H}$  NMR (400 MHz,  $\text{CDCl}_3$ ): 0.93 (d,  $J = 6.8$  Hz, 3H), 0.99 (d,  $J = 7.2$  Hz, 3H), 1.13 (d,  $J = 6.4$  Hz, 3H), 3.31-3.42 (m, 1H), 4.00-4.45 (brd, 1H), 6.49 (td,  $J = 7.2, 1.2$  Hz, 1H), 6.61 (dd,  $J = 8, 1.6$  Hz, 1H), 7.13 (td,  $J = 8, 1.6$  Hz, 1H), 7.39 (dd,  $J = 7.6, 1.2$  Hz, 1H).  $^{13}\text{C}$  NMR (100 MHz):  $\delta = 16.8, 17.9, 19.2, 32.4, 53.8, 110.1, 111.9, 117.1, 128.6, 132.7, 144.7$ . IR (neat):  $\nu = 736, 1016, 1107, 1163, 1242, 1284, 1322, 1388, 1373, 1427, 1458, 1506, 1594, 2873, 2961, 3412$   $\text{cm}^{-1}$ ; EI-HRMS calcd. for  $\text{C}_{11}\text{H}_{16}\text{BrN}$  241.0466, found 241.0467.

2-Bromo-*N*-(3,3-dimethylbutan-2-yl)aniline:

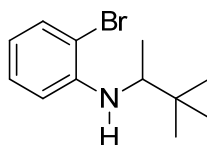

Synthesized by RP2, colorless oil, 55% yield,  $^1\text{H}$  NMR (400 MHz,  $\text{CDCl}_3$ ): 0.98 (s, 9H), 1.11 (d,  $J = 6.4$  Hz, 3H), 3.19-3.32 (m, 1H), 4.26 (d,  $J = 7.2$  Hz, 1H), 6.48 (td,  $J = 8, 1.6$  Hz, 1H), 6.63 (dd,  $J = 8, 0.8$  Hz, 1H), 7.13 (td,  $J = 8, 1.6$  Hz, 1H), 7.38 (dd,  $J = 7.6, 1.6$  Hz, 1H).  $^{13}\text{C}$  NMR (100 MHz):  $\delta = 16.0, 27.0, 35.1, 57.5, 110.2, 111.7, 117.2, 128.7, 132.7, 145.2$ . IR (neat):  $\nu = 735, 1016, 1106, 1140, 1285, 1321, 1373, 1396, 1427, 1459, 1509, 1592, 2870, 2963, 3412$   $\text{cm}^{-1}$ ; EI-HRMS calcd. for  $\text{C}_{12}\text{H}_{18}\text{BrN}$  255.0623, found 255.0624.

2-Bromo-*N*-(1-methoxypropan-2-yl)aniline:

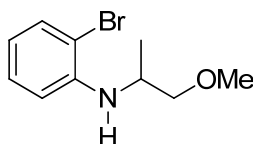

Synthesized by RP2, colorless oil, 58% yield,  $^1\text{H}$  NMR (400 MHz,  $\text{CDCl}_3$ ): 1.25 (d,  $J = 6.4$  Hz, 3H), 3.38 (s, 3H), 3.42 (qd,  $J = 9.6, 4.8$  Hz, 2H), 3.61-3.73 (m, 1H), 4.15-4.85 (brd, 1H), 6.53 (td,  $J = 8, 1.6$  Hz, 1H), 6.67 (dd,  $J = 8, 1.2$  Hz, 1H), 7.14 (td,  $J = 7.6, 1.6$  Hz, 1H), 7.40 (dd,  $J = 8, 1.6$  Hz, 1H).  $^{13}\text{C}$  NMR (100 MHz):  $\delta = 18.2, 48.7, 59.4, 110.4, 112.1, 117.9, 128.6, 132.8, 144.4$ . IR (neat):  $\nu = 738, 922, 986, 1018, 1100, 1166, 1198, 1239, 1284, 1319, 1369, 1388, 1428, 1457, 1504, 1595, 2829, 2879, 2926, 2977, 3403$   $\text{cm}^{-1}$ ; ESI-HRMS calcd. for  $\text{C}_{10}\text{H}_{15}\text{BrNO}$  244.0331, found 244.0327.

2-Bromo-*N*-(1-phenylpropan-2-yl)aniline:

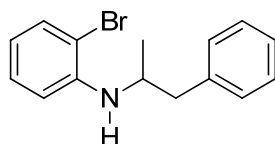

Synthesized by RP1, colorless oil, 47% yield,  $^1\text{H}$  NMR (400 MHz,  $\text{CDCl}_3$ ): 1.20 (d,  $J = 6.4$  Hz, 3H), 2.71 (qd,  $J = 13.2, 4.8$  Hz, 2H), 3.72-3.86 (m, 1H), 4.10-4.42 (brd, 1H), 6.54 (td,  $J = 7.6, 1.2$  Hz, 1H), 6.70 (dd,  $J = 8.4, 1.6$  Hz, 1H), 7.13-7.26 (m, 4H), 7.26-7.34 (m, 2H), 7.42 (dd,  $J = 7.6, 1.6$  Hz, 1H).  $^{13}\text{C}$  NMR (100 MHz):  $\delta = 20.3, 42.5, 49.8, 110.2, 112.0, 117.7, 126.6, 128.6, 128.7, 129.7, 132.8, 138.4, 144.1$ . IR (neat):  $\nu = 737, 1016, 1046, 1112, 1151,$

1201, 1245, 1283, 1319, 1377, 1427, 1453, 1498, 1594, 2926, 2967, 3026, 3063, 3401  $\text{cm}^{-1}$ ;  
EI-HRMS calcd. for  $\text{C}_{15}\text{H}_{16}\text{BrN}$  289.0466, found 289.0462.

2-Bromo-*N*-(4-phenylbutan-2-yl)aniline: <sup>[4]</sup>

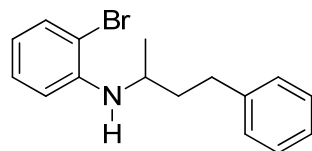

Synthesized by RP1, colorless oil, 43% yield, <sup>1</sup>H NMR (400 MHz,  $\text{CDCl}_3$ ): 1.26 (d,  $J = 6.4$  Hz, 3H), 1.76-2.00 (m, 2H), 2.73 (t,  $J = 8$  Hz, 2H), 3.44-3.58 (m, 1H), 4.02-4.30 (brd, 1H), 6.48-6.56 (m, 2H), 7.12 (td,  $J = 7.6, 1.6$  Hz, 1H), 7.15-7.22 (m, 3H), 7.25-7.32 (m, 2H), 7.41 (dd,  $J = 8.4, 1.6$  Hz, 1H). <sup>13</sup>C NMR (100 MHz):  $\delta = 21.0, 32.6, 38.9, 48.2, 110.1, 112.0, 117.5, 126.1, 128.6, 132.7, 141.9, 144.3$ . IR (neat):  $\nu = 740, 1017, 1061, 1094, 1161, 1190, 1286, 1320, 1378, 1426, 1457, 1506, 1595, 2926, 2965, 3026, 3062, 3403$   $\text{cm}^{-1}$ ; EI-HRMS calcd. for  $\text{C}_{16}\text{H}_{18}\text{BrN}$  303.0623, found 303.0620.

Ethyl 4-((2-bromophenyl)amino)pentanoate:

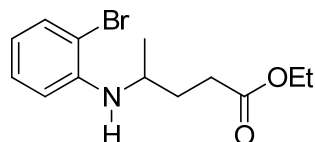

Synthesized by RP1, colorless oil, 8% yield, <sup>1</sup>H NMR (400 MHz,  $\text{CDCl}_3$ ): 1.22 (t,  $J = 7.2$  Hz, 3H), 1.22 d,  $J = 6.4$  Hz, 3H), 1.78-2.00 (m, 2H), 2.41 (t,  $J = 7.6$  Hz, 2H), 4.11 (q,  $J = 7.2$  Hz, 1H), 4.11 (brd, 1H), 6.52 (td,  $J = 8, 1.2$  Hz, 1H), 6.64 (dd,  $J = 8.4, 1.2$  Hz, 1H), 7.14 (d,  $J = 7.8, 1.2$  Hz, 1H), 7.39 (dd,  $J = 8, 1.6$  Hz, 1H). <sup>13</sup>C NMR (100 MHz):  $\delta = 14.4, 20.9, 31.2, 31.9, 48.4, 60.7, 110.2, 112.0, 117.7, 128.7, 132.8, 144.3, 173.7$ . IR (neat):  $\nu = 739, 1017, 1095, 1119, 1178, 1215, 1258, 1320, 1375, 1428, 1460, 1506, 1595, 1729, 2972, 3383$   $\text{cm}^{-1}$ ; ESI-HRMS calcd. for  $\text{C}_{13}\text{H}_{19}\text{BrNO}_2$  300.0593, found 300.0597.

2-Bromo-*N*-(5-((tert-butyldimethylsilyl)oxy)pentan-2-yl)aniline:

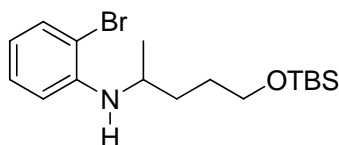



Synthesized by RP1, colorless oil, 50% yield,  $^1\text{H}$  NMR (400 MHz,  $\text{CDCl}_3$ ): 0.03 (s, 3H), 0.03 (s, 3H), 0.87 (s, 9H), 1.21 (d,  $J = 6.4$  Hz, 3H), 3.44-3.56 (m, 1H), 3.62 (t,  $J = 6$  Hz, 2H), 3.98-4.32 (brd, 1H), 6.50 (td,  $J = 8, 1.6$  Hz, 1H), 6.61 (dd,  $J = 8, 1.2$  Hz, 1H), 7.13 (td,  $J = 7.6, 1.6$  Hz, 1H), 7.38 (dd,  $J = 7.6, 1.6$  Hz, 1H).  $^{13}\text{C}$  NMR (100 MHz):  $\delta = -5.1, 18.6, 21.0, 26.2, 29.5, 33.4, 48.7, 63.2, 110.0, 111.9, 117.3, 128.6, 132.7, 144.5$ . IR (neat):  $\nu = 737, 833, 939, 1017, 1092, 1206, 1252, 1285, 1321, 1381, 1427, 1460, 1508, 1596, 2857, 2929, 3409$   $\text{cm}^{-1}$ ; ESI-HRMS calcd. for  $\text{C}_{17}\text{H}_{31}\text{BrNOSi}$  372.1335, found 372.1336.

### 1.3 Representative synthesis of methyl *N*-cycloalkyl-2-bromophenylcarbamate **1** and **6**:

*N*-alkyl-*o*-bromoaniline was dissolved in methyl chloroformate (15 equivs.). The reaction mixture was refluxed for 4-24 hours and then poured into water and extracted with dichloromethane. The organic phase was dried over  $\text{MgSO}_4$  and evaporated after filtration. The filtrate was evaporated by rotary evaporator and purified by f.c.. (silica gel; ethyl acetate/pentane as eluent) affording carbamate **1** or **6**.

Methyl (2-bromophenyl)(isopropyl)carbamate **1a**:<sup>[3]</sup>

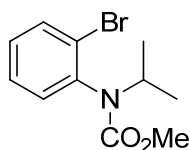

White solid, 77% yield, M.p. 47 °C,  $^1\text{H}$  NMR (400 MHz,  $\text{CDCl}_3$ ): 1.01 (d,  $J = 7.2$  Hz, 3H), 1.30 (d,  $J = 6.4$  Hz, 3H), 3.61 (s, 3H), 4.36-4.42 (m, 1H), 7.15 (dd,  $J = 7.6, 1.6$  Hz, 1H), 7.17 (d,  $J = 7.6$  Hz, 1H), 7.30 (td,  $J = 7.6, 1.6$  Hz, 1H), 7.62 (d,  $J = 7.6, 1.2$  Hz, 1H).  $^{13}\text{C}$  NMR (100 MHz):  $\delta = 19.8, 22.8, 50.5, 53.0, 126.1, 128.0, 129.1, 130.8, 133.6, 138.6, 155.4$ . MS (ESI, 70 eV):  $m/z$  (%) = 253 (M)<sup>+</sup>; IR (neat):  $\nu = 726, 755, 785, 861, 955, 980, 1051, 1095, 1134, 1194, 1249, 1265, 1276, 1319, 1368, 1390, 1441, 1477, 1586, 1706, 2977$   $\text{cm}^{-1}$ ; ESI-HRMS calcd. for  $\text{C}_{11}\text{H}_{14}\text{NNaO}_2\text{Br}$  294.0100, found 253.0099.

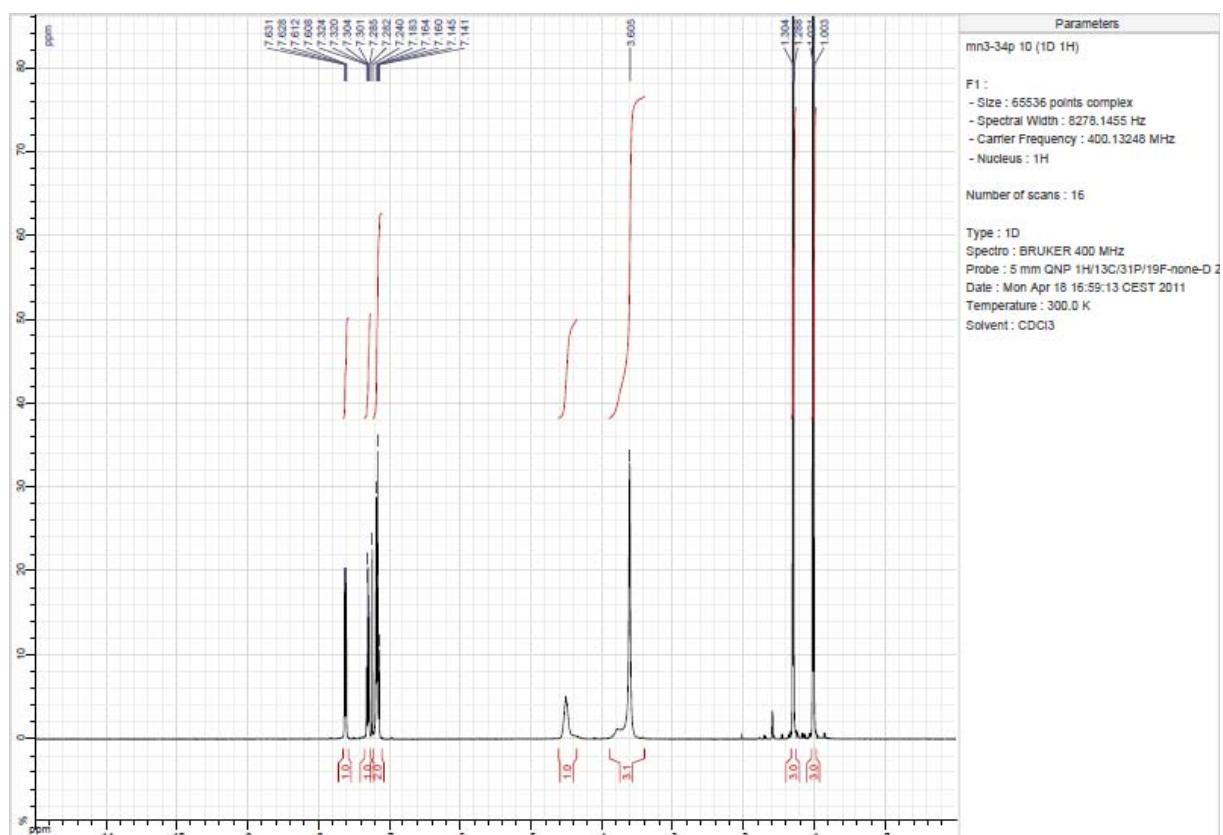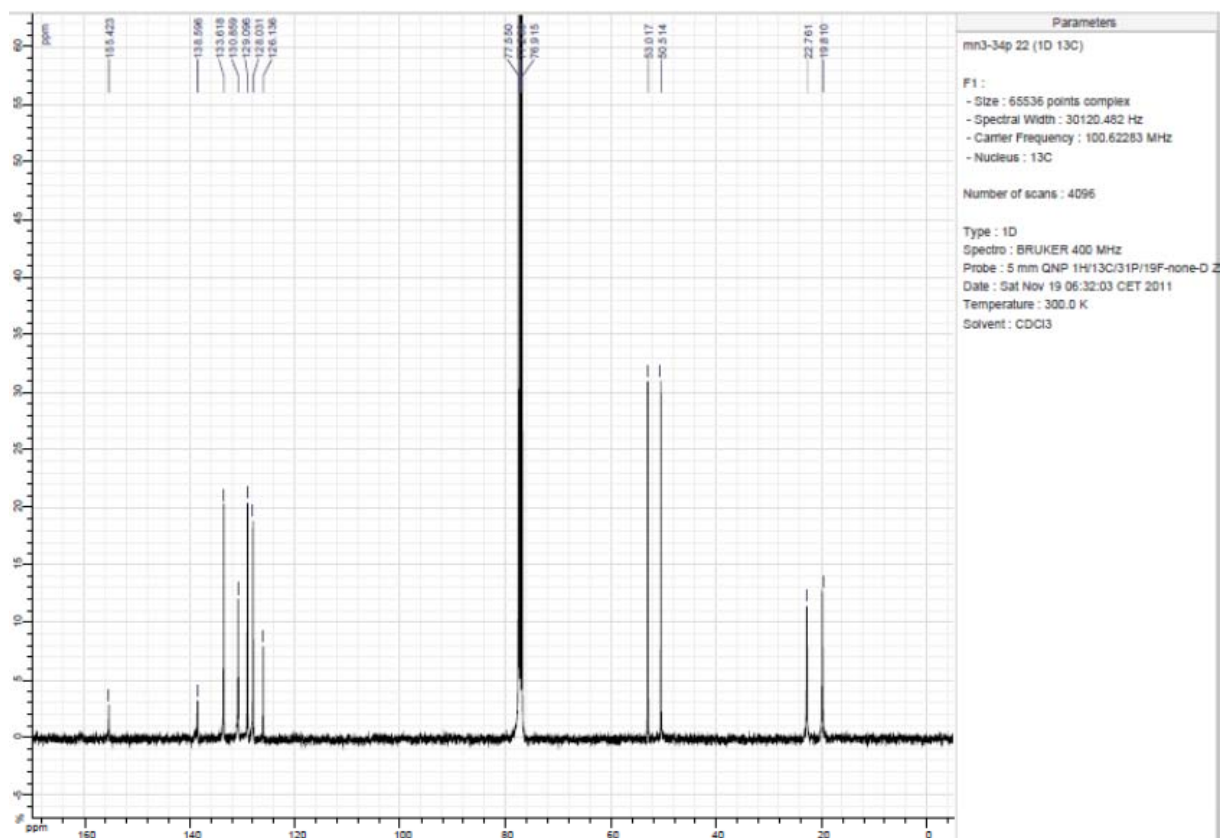

Methyl (2-bromophenyl)(pentan-3-yl)carbamate **1b**:

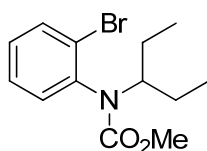

White solid, 93% yield, M.p. 36 °C,  $^1\text{H}$  NMR (400 MHz,  $\text{CDCl}_3$ ): 1.16-1.46 (m, 5H), 1.58-1.69 (m, 1H), 1.70-1.82 (m, 2H), 1.96-2.10 (m, 2H), 3.22-3.36 (m, 1H), 4.22 (d,  $J = 7.6$  Hz, 1H), 6.50 (td,  $J = 8, 1.2$  Hz, 1H), 6.63 (dd,  $J = 8$  Hz, 1H), 7.13 (d,  $J = 8, 1.2$  Hz, 1H), 7.39 (dd,  $J = 8, 1.2$  Hz, 1H).  $^{13}\text{C}$  NMR (100 MHz):  $\delta = 25.6, 26.1, 30.4, 33.1, 53.0, 58.4, 126.2, 127.9, 129.0, 131.1, 133.5, 138.8, 155.5$ . MS (ESI, 70 eV):  $m/z$  (%) = 253 (M) $^+$ ; IR (neat):  $\nu = 736, 853, 888, 923, 1016, 1096, 1126, 1148, 1231, 1253, 1285, 1319, 1366, 1429, 1451, 1505, 1592, 2852, 2927, 3404$   $\text{cm}^{-1}$ ; HRMS calcd. for  $\text{C}_{12}\text{H}_{16}\text{NBr}$  253.0466, found 253.0466.

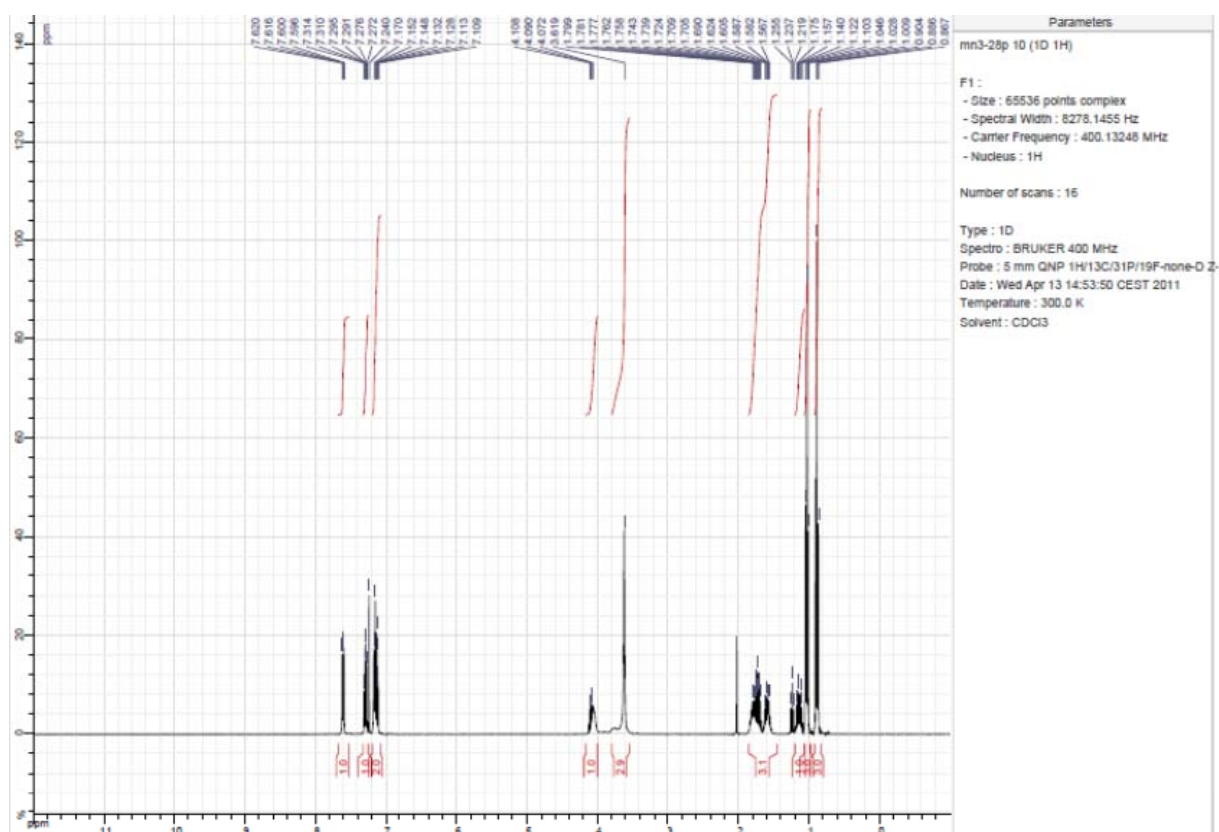

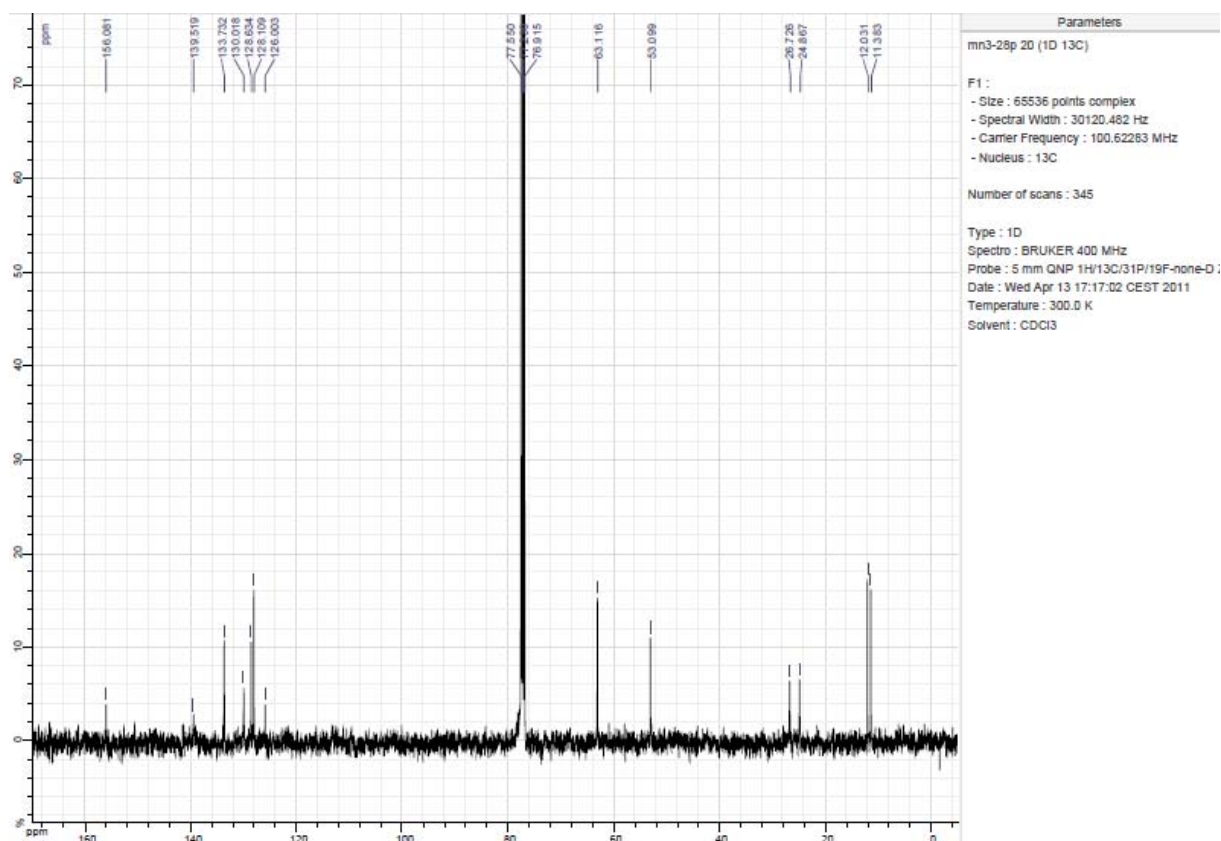

Methyl (2-bromophenyl)(heptan-4-yl)carbamate **1c**:

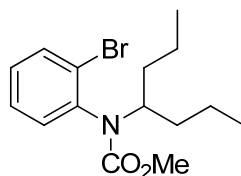

White solid, 97% yield, M.p. 41 °C,  $^1\text{H}$  NMR (400 MHz,  $\text{CDCl}_3$ ): 0.84 (t,  $J = 7.2$  Hz, 1H), 0.95 (t,  $J = 7.2$  Hz, 1H), 1.03-1.18 (m, 1H), 1.20-1.72 (m, 7H), 3.61 (s, 3H), 4.04-4.34 (m, 1H), 7.08-7.18 (m, 2H), 7.30 (td,  $J = 7.6, 1.2$  Hz, 1H), 7.61 (dd,  $J = 8.8, 1.6$  Hz, 1H).  $^{13}\text{C}$  NMR (100 MHz):  $\delta = 14.3, 14.4, 20.1, 20.7, 34.4, 36.8, 53.1, 59.8, 53.1, 59.8, 126.0, 128.1, 128.6, 130.1, 139.4, 156.0$ . MS (ESI, 70 eV):  $m/z$  (%) = 328 ( $\text{M}+\text{H}$ ) $^+$ ; IR (neat):  $\nu = 744, 763, 905, 930, 1001, 1031, 1058, 1108, 1191, 1264, 1289, 1318, 1389, 1440, 1473, 1585, 1707, 2871, 2957$   $\text{cm}^{-1}$ ; HRMS calcd. for  $\text{C}_{15}\text{H}_{23}\text{BrNO}_2$  328.0906, found 328.0904.

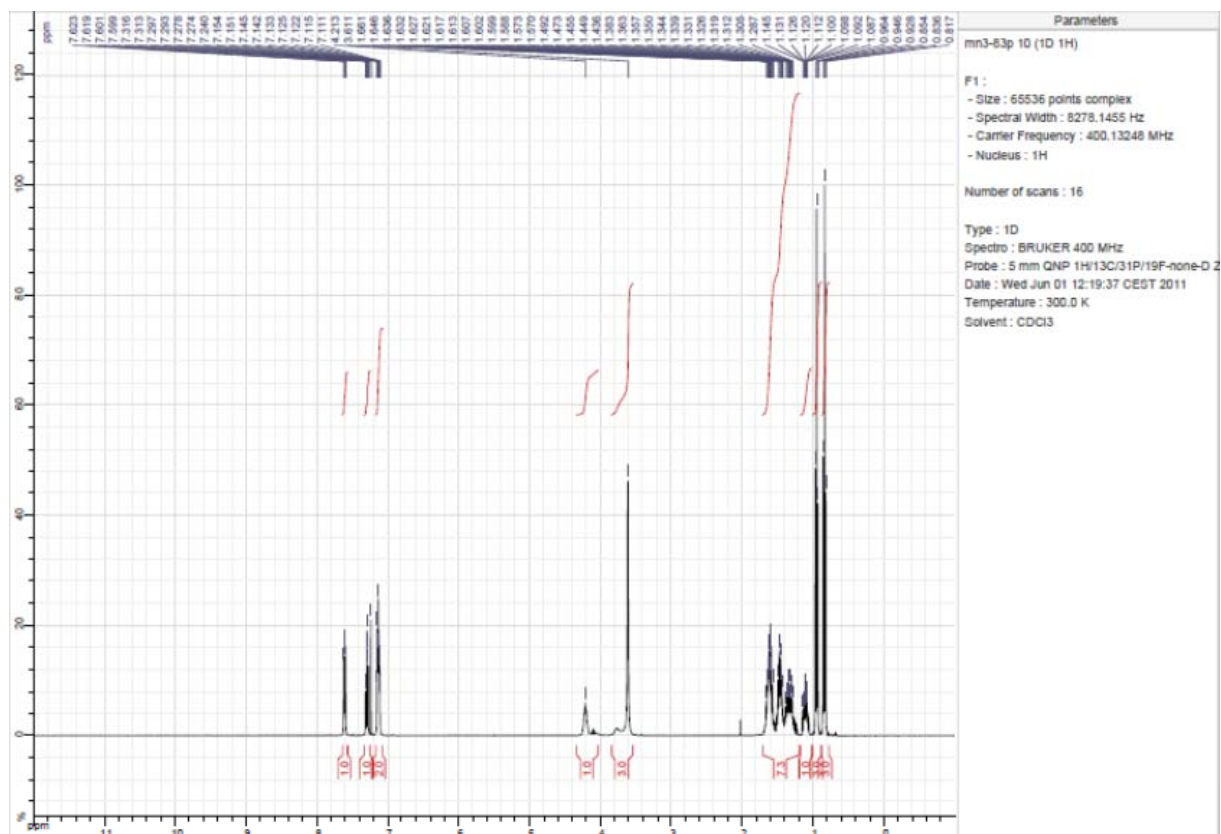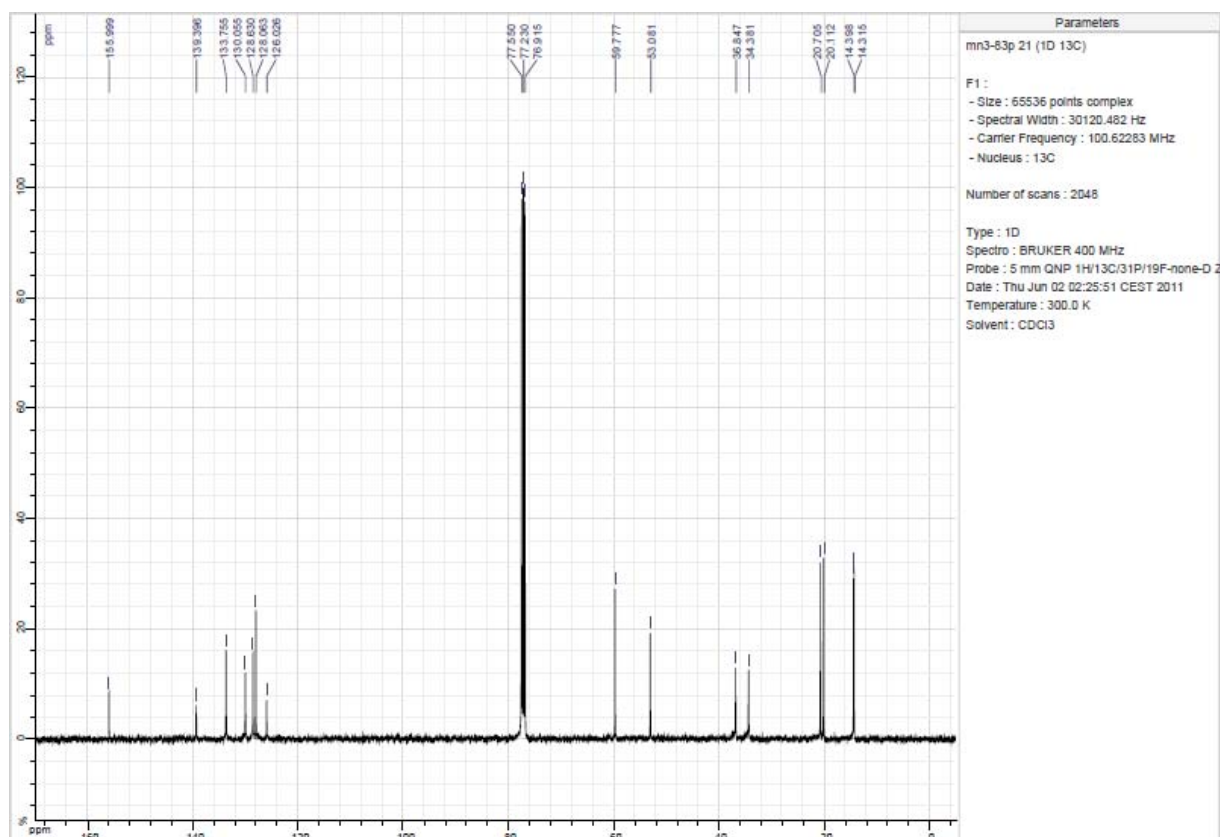

Methyl (2-bromophenyl)(1,3-diphenylpropan-2-yl)carbamate **1d**:

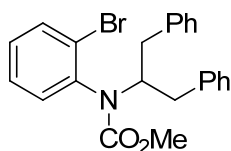

White solid, M.p. 77 °C, 88% yield,  $^1\text{H}$  NMR (400 MHz,  $\text{CDCl}_3$ ): 2.60 (dd,  $J = 14, 6$  Hz, 1H), 3.40 (d,  $J = 8$  Hz, 2H), 3.42-3.51 (m, 1H), 3.66 (s, 3H), 4.00-4.15 (m, 1H), 5.93 (d,  $J = 7.2$  Hz, 1H), 6.15-6.39 (brd, 0.1H), 6.96-7.11 (m, 4H), 7.15-7.36 (m, 8H), 7.54 (d,  $J = 7.6$  Hz, 1H).  $^{13}\text{C}$  NMR (100 MHz):  $\delta = 37.0, 40.1, 53.1, 66.8, 124.6, 126.5, 126.6, 128.3, 128.6, 128.7, 129.4, 129.7, 130.0, 133.4, 139.4, 139.7, 141.5, 155.3$ . MS (ESI, 70 eV):  $m/z$  (%) = 424 ( $\text{M}+\text{H}$ ) $^+$ ; IR (neat):  $\nu = 699, 720, 750, 789, 917, 943, 994, 1029, 1061, 1129, 1155, 1191, 1217, 1265, 1293, 1401, 1441, 1474, 1495, 1584, 1602, 1707, 2951, 3027$   $\text{cm}^{-1}$ ; ESI-HRMS calcd. for  $\text{C}_{23}\text{H}_{23}\text{NOBr}$  424.0906, found 424.0897.

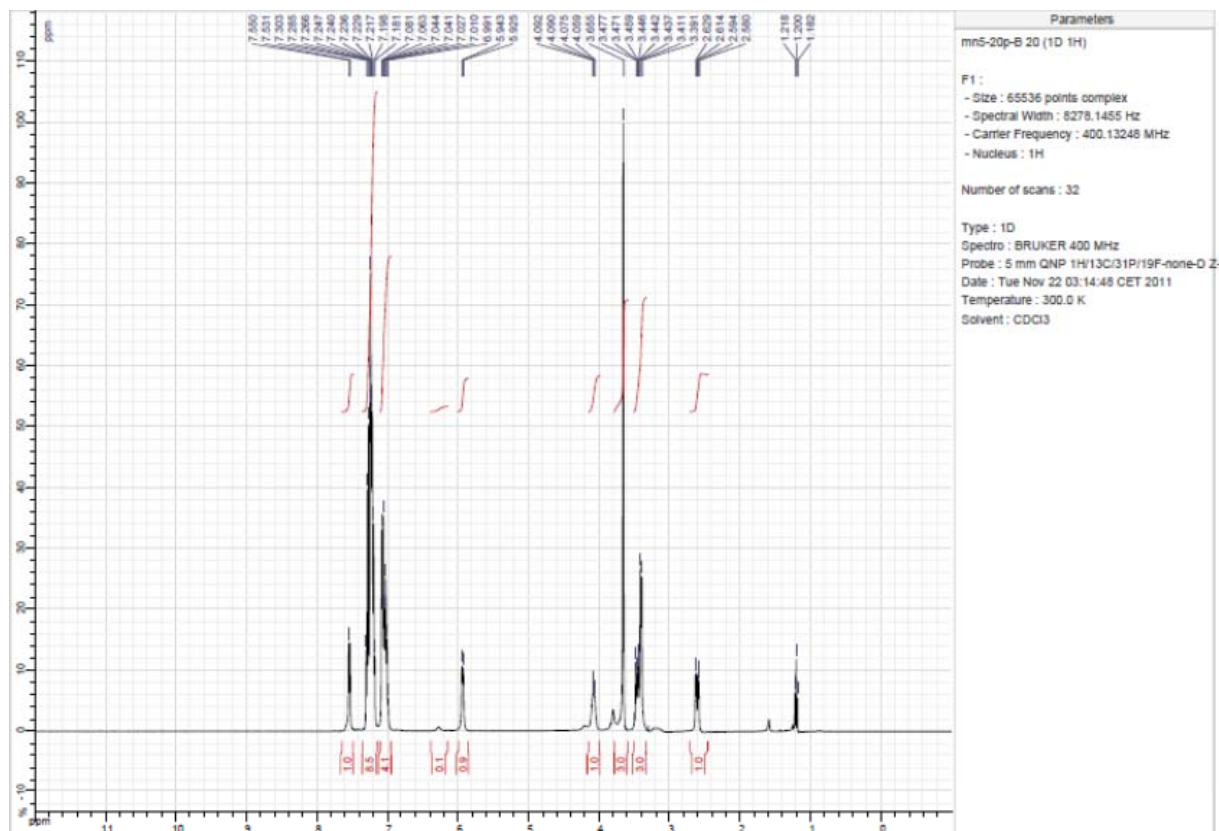

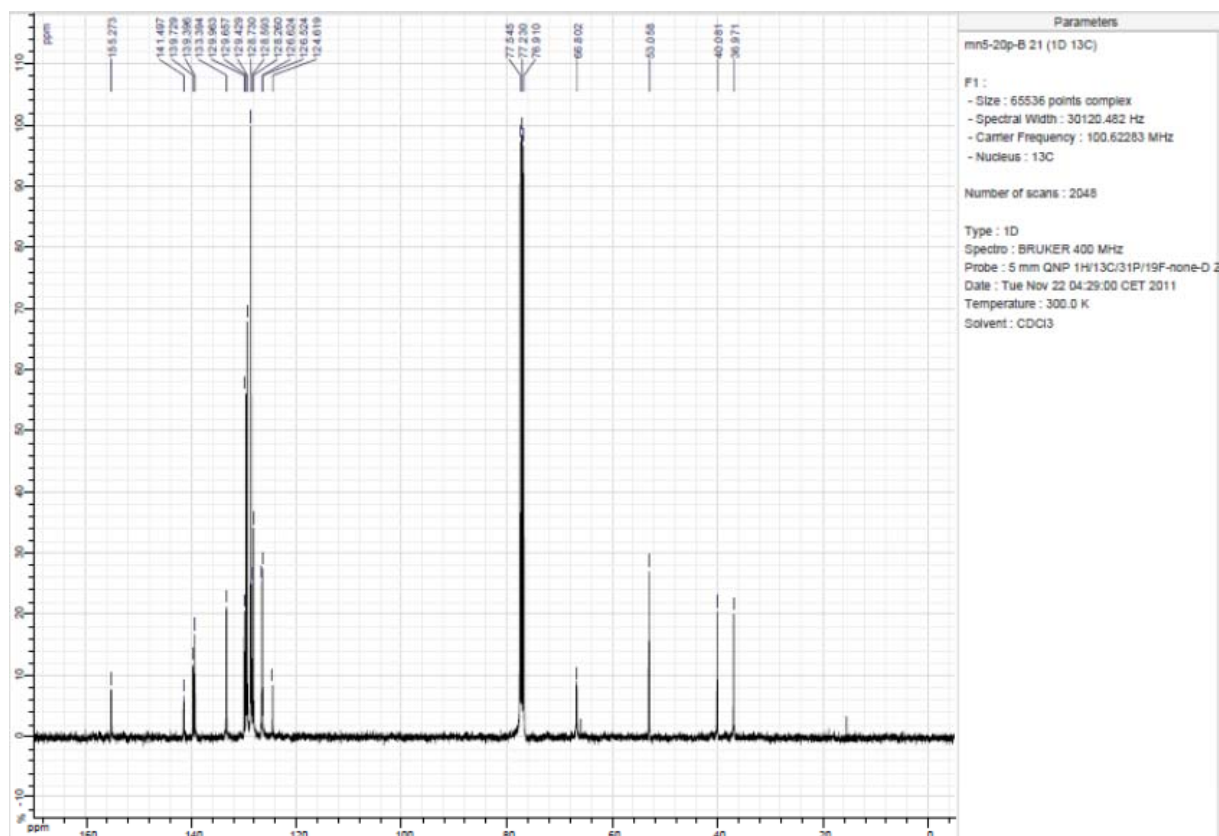

Methyl (2-bromophenyl)(*sec*-butyl)carbamate **6a**:<sup>[3]</sup>

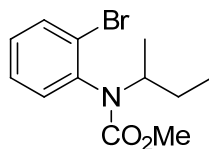

Colorless oil, 98% yield, <sup>1</sup>H NMR (400 MHz, CDCl<sub>3</sub>): 0.87 (t, *J* = 7.6 Hz, 1H), 0.96 (d, *J* = 6.8 Hz, 2H), 0.98 (t, *J* = 7.6 Hz, 2H), 1.32 (d, *J* = 6.4 Hz, 1H), 1.45-1.60 (m, 0.8H), 1.66-1.84 (m, 1.2H), 3.61 (s, 3H), 4.01-4.13 (m, 0.5H), 4.22-4.44 (m, 0.5H), 7.09-7.22 (m, 2H), 7.25-7.33 (m, 1H), 7.54-7.66 (m, 1H). <sup>13</sup>C NMR (100 MHz):  $\delta$  = 11.3, 11.8, 16.8, 19.3, 26.9, 29.9, 52.9, 53.0, 55.9, 57.5, 125.7, 126.3, 128.0, 128.8, 128.9, 130.5, 133.5, 138.4, 139.6, 155.2, 155.8. MS (ESI, 70 eV): *m/z* (%) = 286 (M+H)<sup>+</sup>; IR (neat):  $\nu$  = 730, 753, 840, 935, 953, 998, 1028, 1052, 1093, 1120, 1191, 1244, 1266, 1295, 1310, 1325, 1389, 1439, 1475, 1585, 1706, 2877, 2968 cm<sup>-1</sup>; ESI-HRMS calcd. for C<sub>12</sub>H<sub>17</sub>BrN 286.0437, found 286.0432.

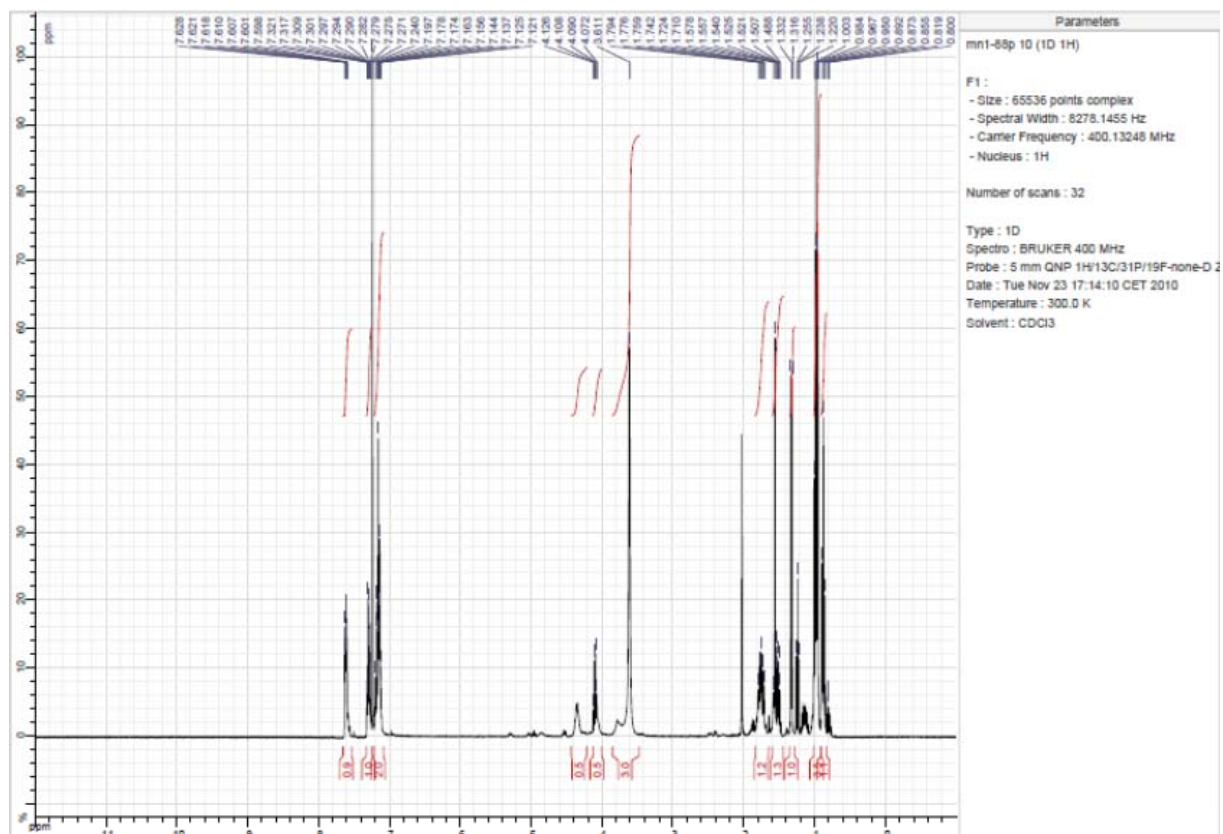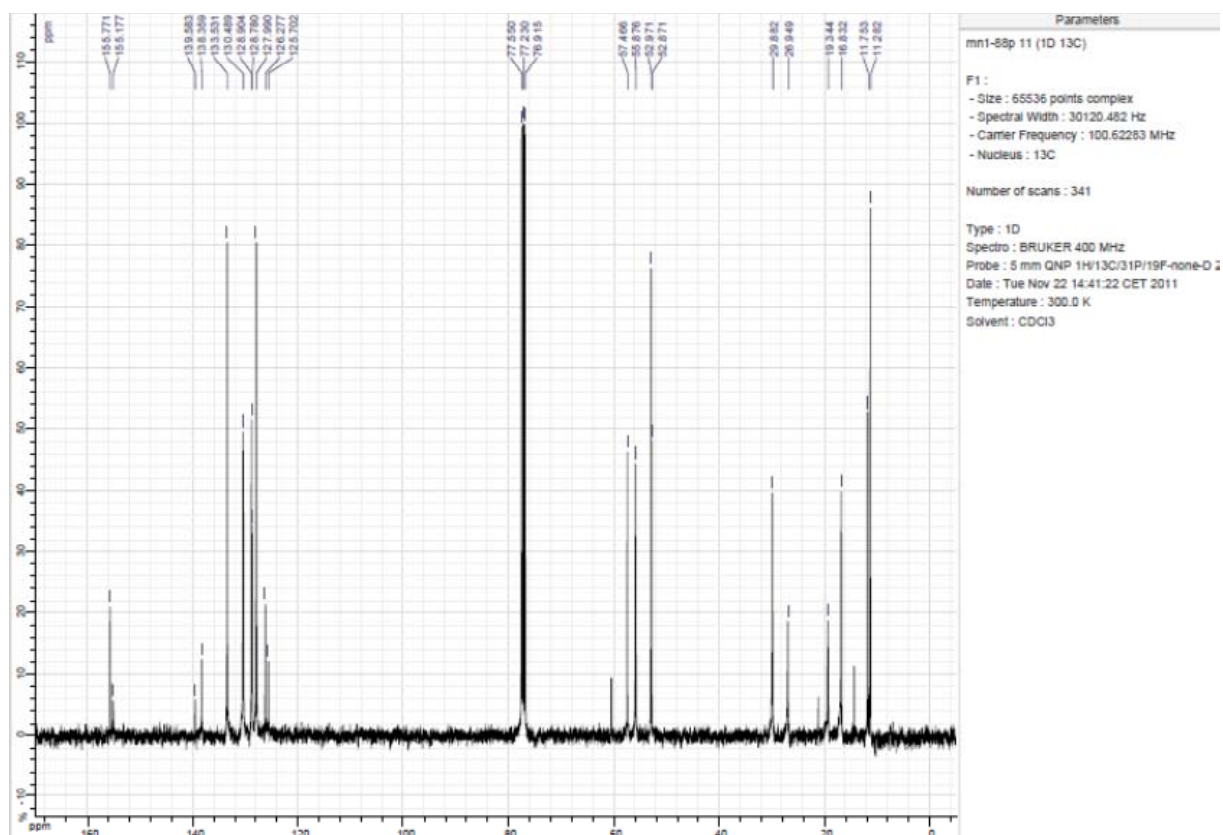

Methyl (2-bromophenyl)(pentan-2-yl)carbamate **6b**:



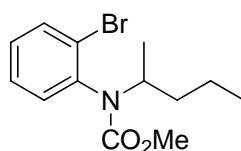

Colorless oil, 99% yield,  $^1\text{H}$  NMR (400 MHz,  $\text{CDCl}_3$ ): 0.85 (t,  $J = 7.2$  Hz, 1.2H), 0.91-1.00 (m, 4H), 1.07-1.53 (m, 3.8H), 1.61-1.77 (m, 1H), 3.61 (s, 3H), 4.10-4.24 (m, 0.4H), 4.30-4.55 (m, 0.6H), 7.10-7.22 (m, 2H), 7.26-7.34 (m, 1H), 7.38 (d,  $J = 8$ , 1H).  $^{13}\text{C}$  NMR (100 MHz):  $\delta = 14.2, 14.2, 17.3, 20.0, 20.4, 52.9, 53.0, 54.3, 55.7, 125.8, 126.3, 128.0, 128.8, 128.9, 130.5, 138.4, 139.6, 155.3, 155.7$ . MS (ESI, 70 eV):  $m/z$  (%) = 300 ( $\text{M}+\text{H}$ ) $^+$ ; IR (neat):  $\nu = 728, 746, 761, 785, 869, 911, 951, 1028, 1056, 1301, 1191, 1264, 1319, 1390, 1440, 1475, 1585, 1605, 2872, 2957$   $\text{cm}^{-1}$ ; ESI-HRMS calcd. for  $\text{C}_{13}\text{H}_{19}\text{BrNO}_2$  300.0593, found 300.0604.

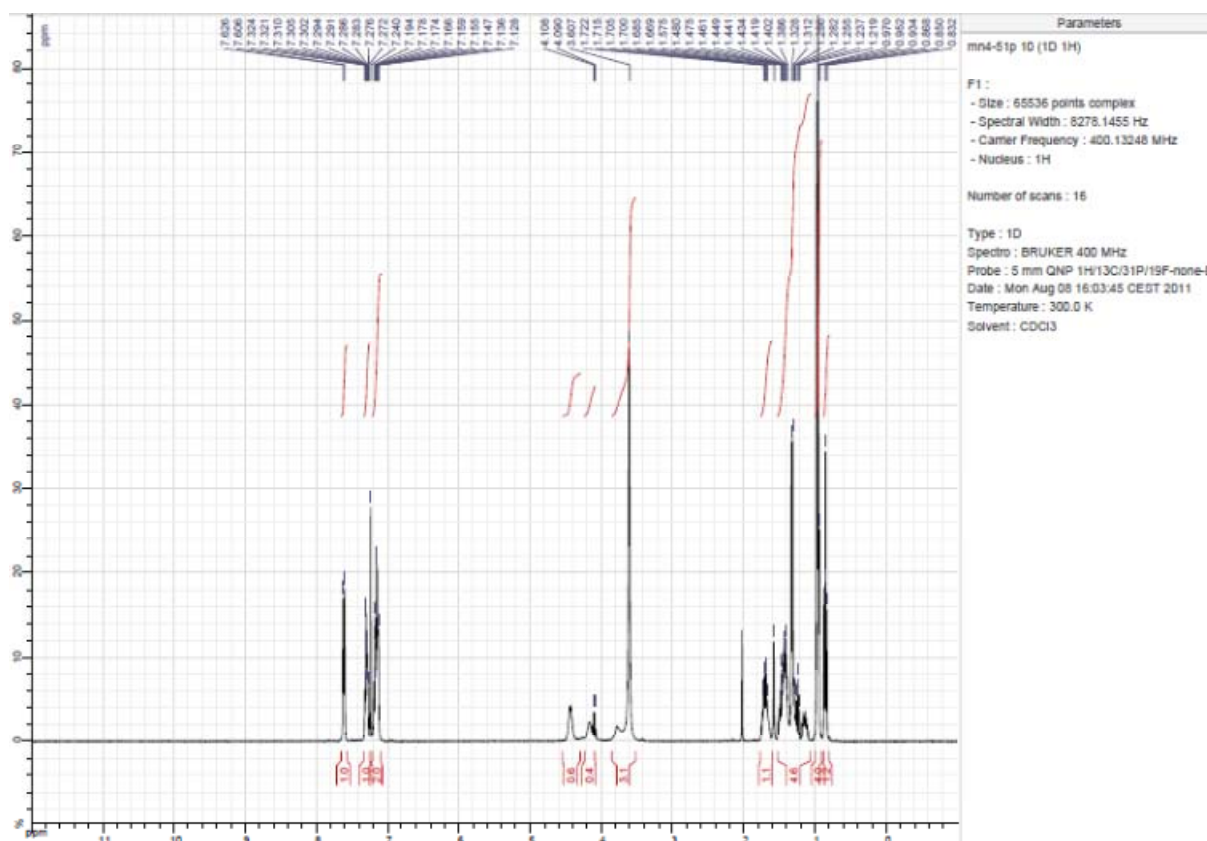

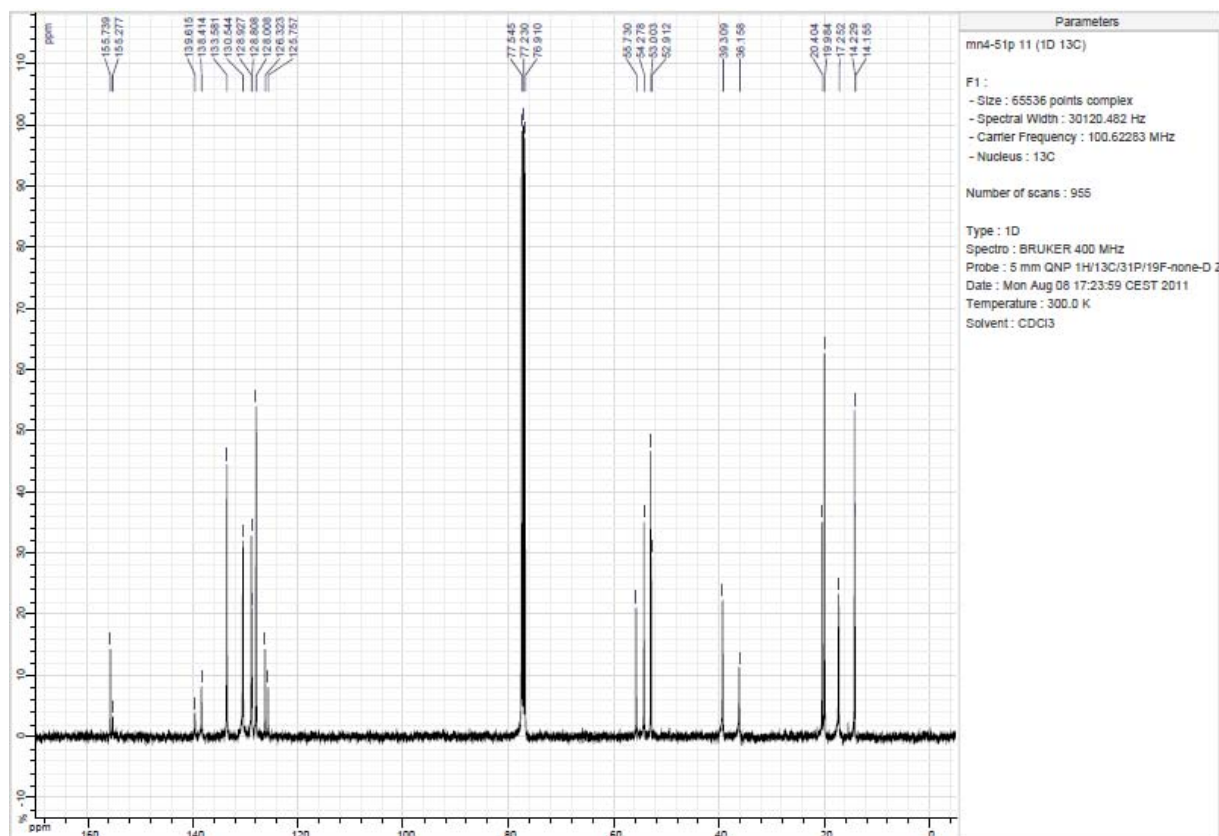

Methyl (2-bromophenyl)(4-phenylbutan-2-yl)carbamate **6c**:

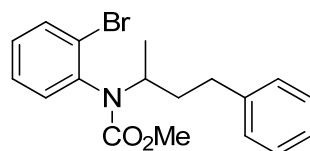

White solid, 88% yield, M.p. 61 °C,  $^1\text{H}$  NMR (400 MHz,  $\text{CDCl}_3$ ): 1.12 (d,  $J = 6.8$  Hz, 1.9H), 1.48 (d,  $J = 6.8$  Hz, 1.1H), 1.55-1.67 (m, 0.4H), 1.82-1.99 (m, 0.6H), 2.08-2.26 (m, 1H), 2.70 (d,  $J = 8.4$  Hz, 0.7H), 2.81 (t,  $J = 8.4$  Hz, 1.3H), 3.71 (s, 3H), 4.23-4.39 (m, 0.4H), 4.49-4.67 (m, 0.6H), 7.15-7.45 (m, 8H), 7.70 (td,  $J = 8.4, 1.2$  Hz, 1H).  $^{13}\text{C}$  NMR (100 MHz):  $\delta = 17.3, 20.2, 33.3, 33.6, 35.9, 39.0, 53.0, 53.1, 54.5, 55.7, 125.7, 126.1, 126.1, 126.3, 128.2, 128.5, 128.6, 128.9, 129.1, 133.7, 138.5, 141.8, 142.0, 155.4, 155.8$ . MS (ESI, 70 eV):  $m/z$  (%) = 278 ( $\text{M}+\text{H}$ ) $^+$ ; IR (neat):  $\nu = 724, 750, 783, 952, 1029, 1043, 1060, 1117, 1190, 1317, 1389, 1440, 1475, 1585, 1705, 2950, 3026$   $\text{cm}^{-1}$ ; ESI-HRMS calcd. for  $\text{C}_{15}\text{H}_{20}\text{NO}_4$  278.1386, found 278.1390.

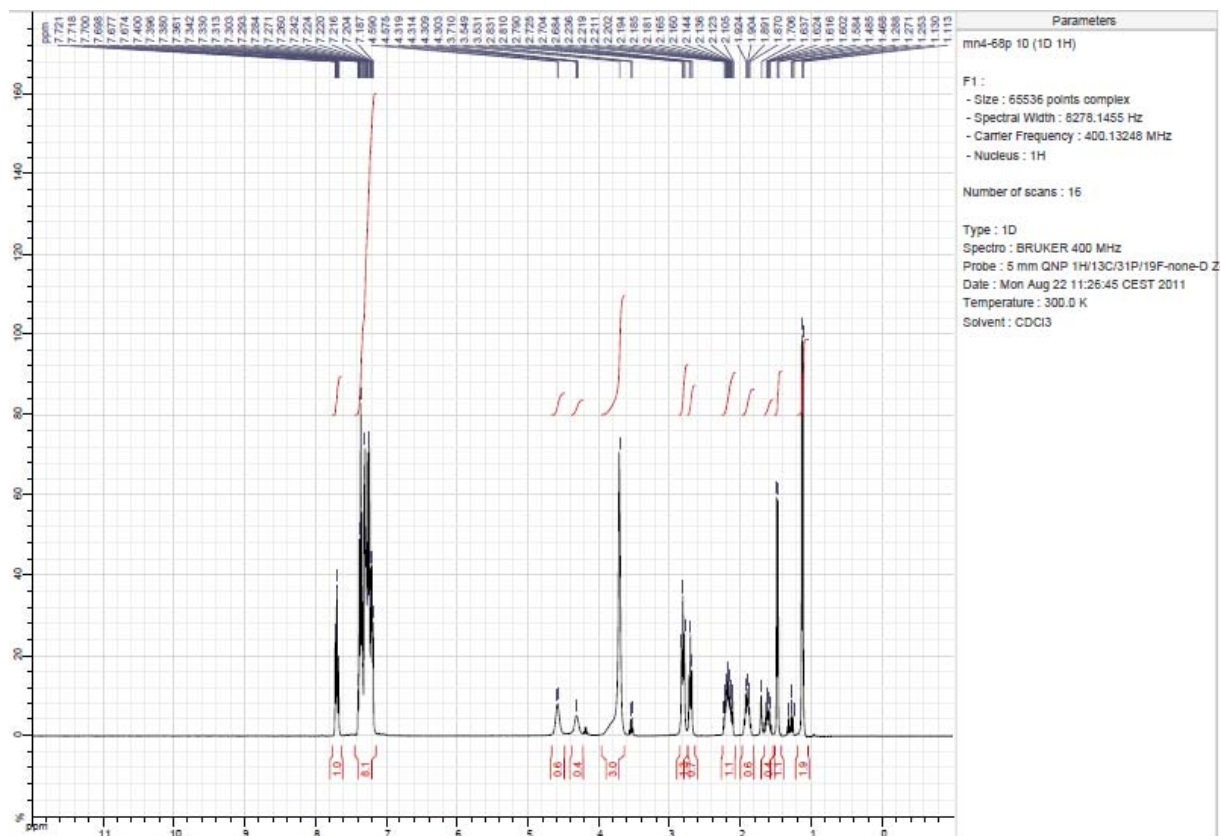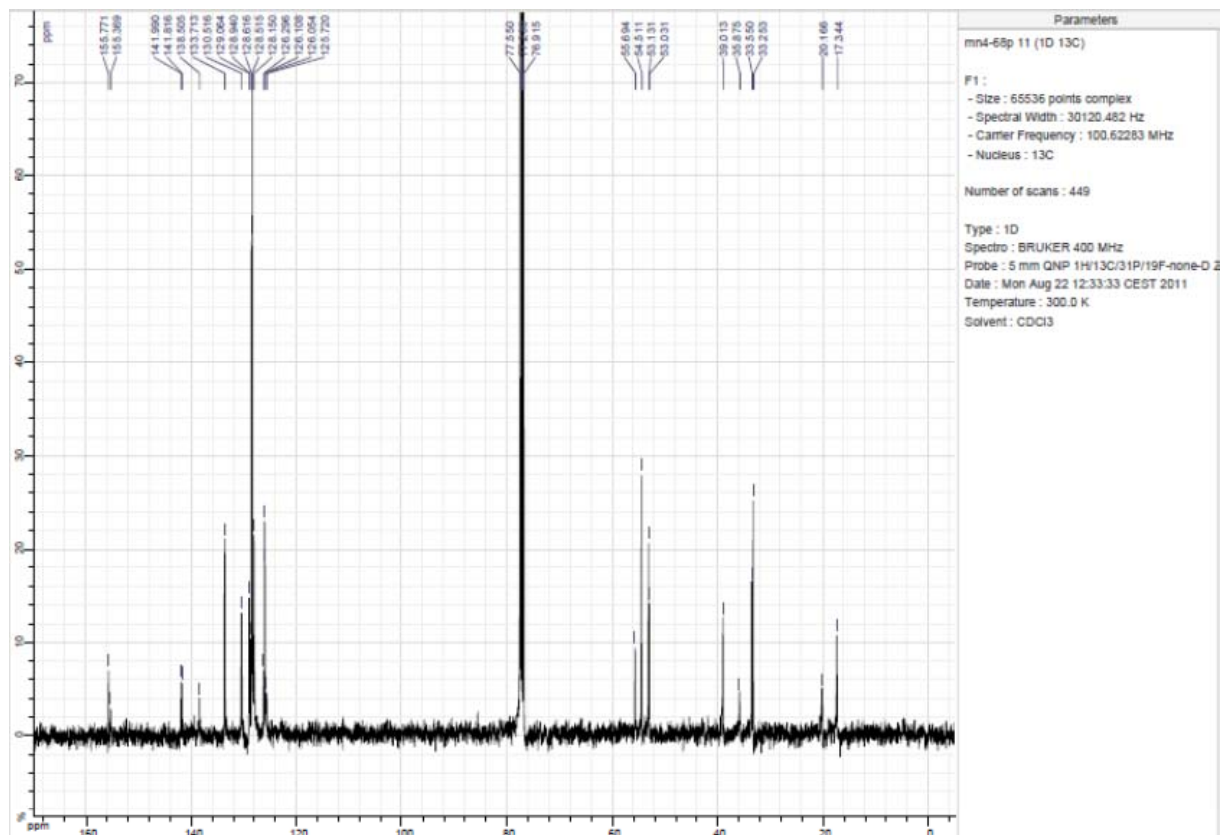

Methyl (2-bromophenyl)(5-((*tert*-butyldimethylsilyl)oxy)pentan-2-yl)carbamate **6d**:

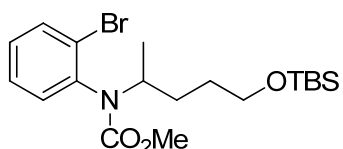

Colorless oil, 29% yield,  $^1\text{H}$  NMR (400 MHz,  $\text{CDCl}_3$ ): -0.04 (s, 1H), -0.03 (s, 1H), 0.04 (s, 3.8H), 0.08 (s, 0.8H), 0.82 (s, 3.2H), 0.88 (d  $J = 6.8$  Hz, 1.1H), 0.89 (s, 5H), 0.98 (d  $J = 6.8$  Hz, 1.9H), 1.34 (d  $J = 6.8$  Hz, 1.1H), 1.44-1.85 (m, 4H), 3.47-3.74 (m, 2H), 3.61 (s, 3H), 4.08-4.28 (m, 0.4H), 4.40-4.58 (m, 0.6H) 7.10-7.23 (m, 2H), 7.29 (td,  $J = 8, 1.2$  Hz, 1H), 7.14 (d,  $J = 8, 1.2$  Hz, 1H), 7.38 (dd,  $J = 8, 1.2$  Hz, 1H).  $^{13}\text{C}$  NMR (100 MHz):  $\delta = -5.2, -5.1, 15.5, 17.6, 18.5, 18.6, 20.1, 26.2, 26.2, 30.0, 30.5, 33.4, 53.0, 53.1, 54.2, 55.8, 63.1, 125.8, 126.4, 128.1, 128.9, 129.0, 130.6, 130.7, 138.2, 155.9$ . MS (ESI, 70 eV):  $m/z$  (%) = 430 ( $\text{M}+\text{H}$ ) $^+$ ; IR (neat):  $\nu = 729, 774, 833, 939, 1006, 1030, 1090, 1192, 1252, 1321, 1390, 1441, 1475, 1586, 1711, 2857, 2952$   $\text{cm}^{-1}$ ; ESI-HRMS calcd. for  $\text{C}_{19}\text{H}_{33}\text{BrNO}_3\text{Si}$  430.1407, found 430.1406.

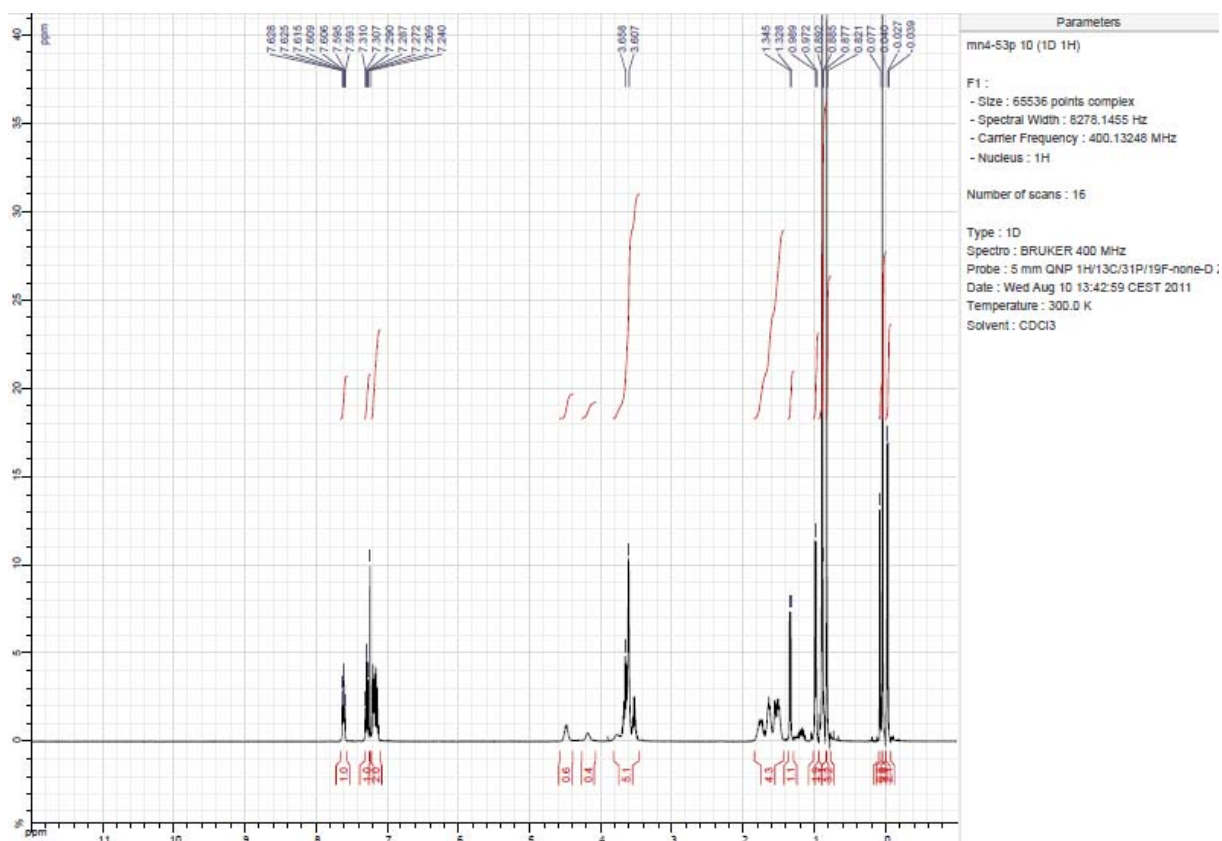

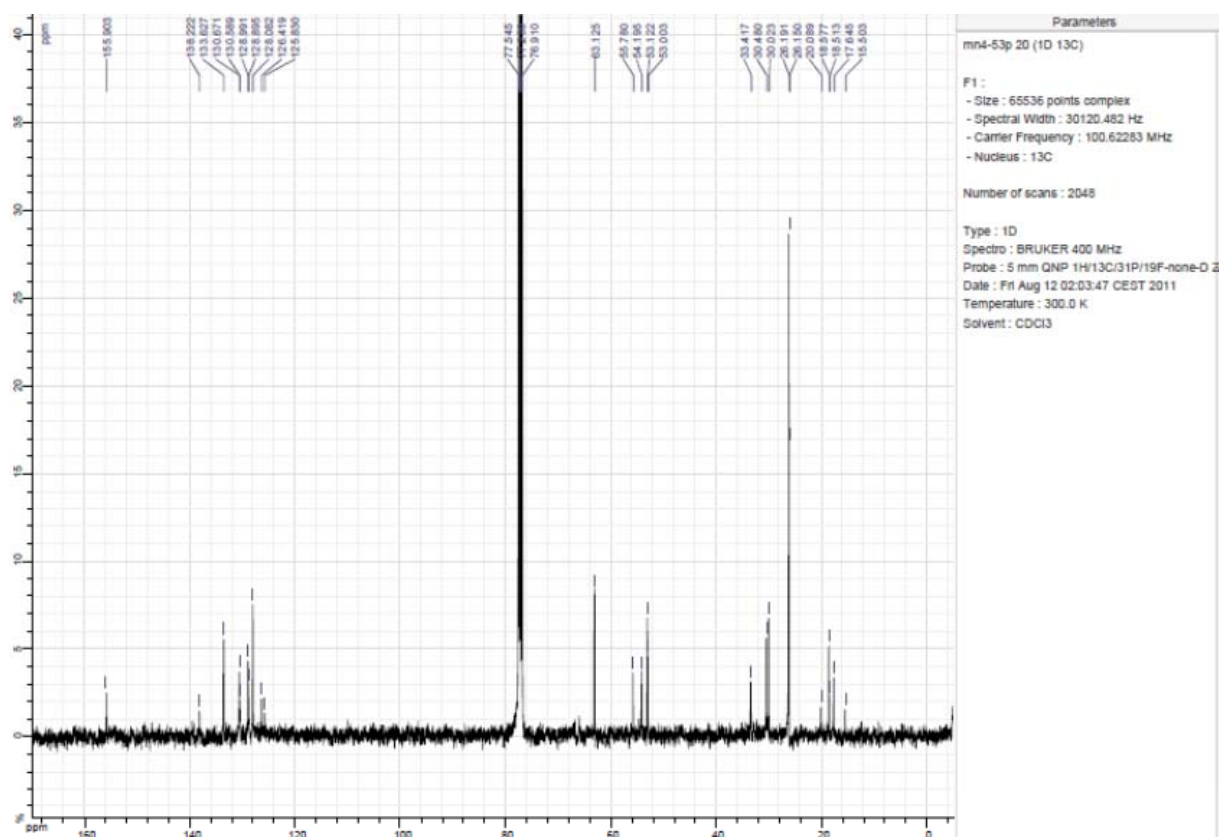

Ethyl 4-((2-bromophenyl)(methoxycarbonyl)amino)pentanoate **6e**:

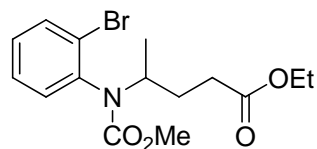

Colorless oil, >99% yield,  $^1\text{H}$  NMR (400 MHz,  $\text{CDCl}_3$ ): 0.99 (d,  $J = 6.8$  Hz, 2H), 1.45-1.28 (m, 3.2H), 1.34 (d,  $J = 6.8$  Hz, 1H), 1.54-1.68 (m, 0.8H), 1.68-1.81 (m, 2H), 1.77-1.91 (m, 0.7H), 1.97-2.14 (m, 1H), 2.36 (t,  $J = 7.6$  Hz, 0.7H), 2.45 (t,  $J = 7.6$  Hz, 1.3H), 3.61 (s, 3H), 4.02-4.20 (m, 2.3H), 4.30-4.56 (m, 0.7H), 7.11-7.23 (m, 2H), 7.26-7.35 (m, 1H), 7.62 (d,  $J = 7.6$  Hz, 1H).  $^{13}\text{C}$  NMR (100 MHz):  $\delta = 14.4, 17.4, 19.9, 29.3, 31.8, 32.1, 53.0, 53.2, 53.8, 55.7, 60.6, 60.7, 125.5, 126.3, 128.2, 128.2, 129.0, 129.1, 130.5, 130.6, 133.7, 133.8, 138.2, 139.5, 155.8$ . MS (ESI, 70 eV):  $m/z$  (%) = 358 ( $\text{M}+\text{H}$ ) $^+$ ; IR (neat):  $\nu = 758, 785, 856, 946, 1029, 1076, 1119, 1129, 1319, 1390, 1441, 1475, 1586, 1706, 2980$   $\text{cm}^{-1}$ ; ESI-HRMS calcd. for  $\text{C}_{15}\text{H}_{21}\text{BrNO}_4$  358.0648, found 358.0640.

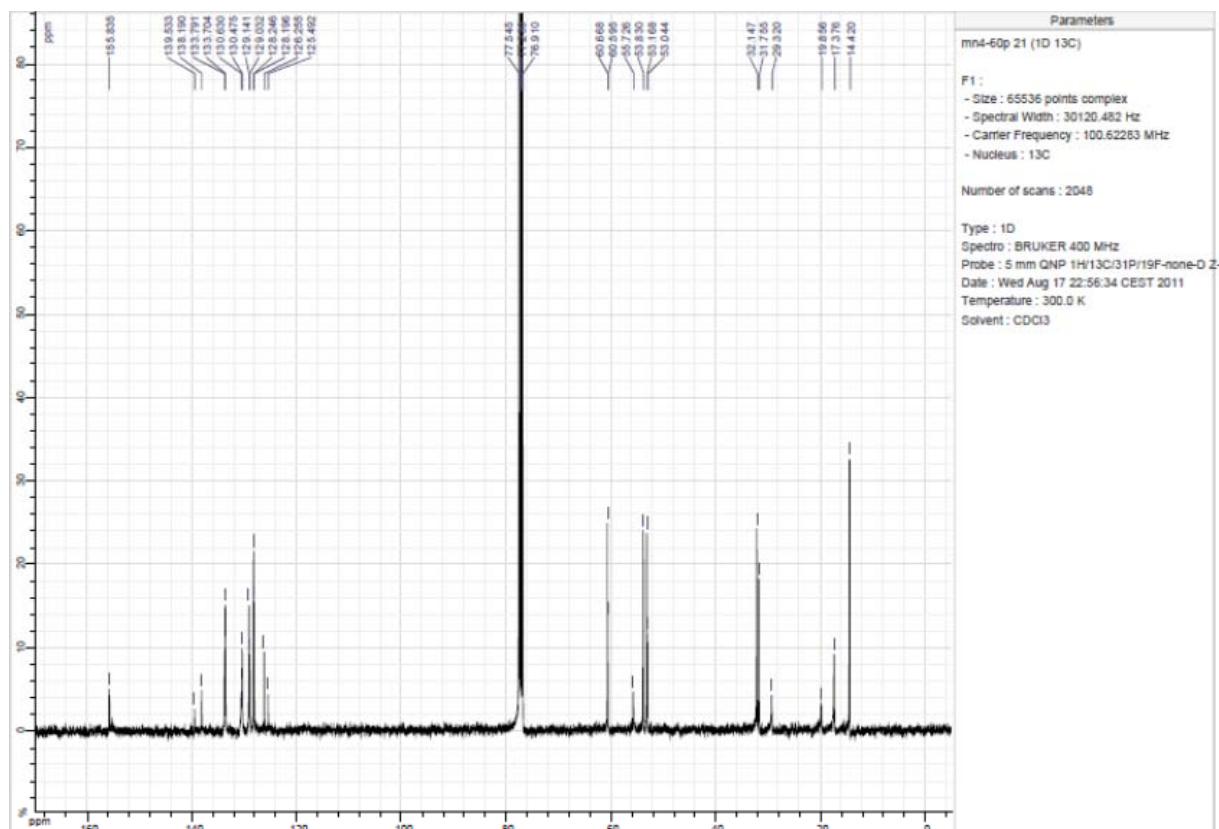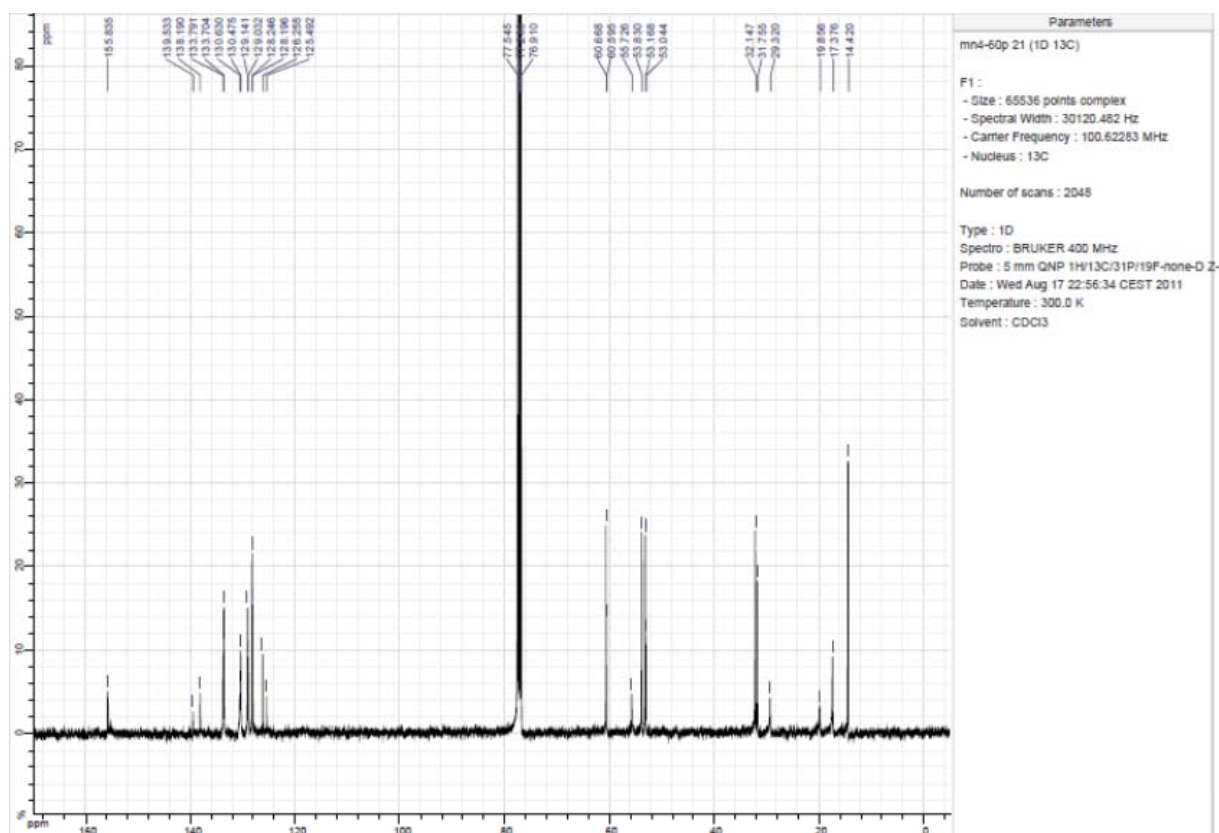

Methyl (2-bromophenyl)(1-methoxypropan-2-yl)carbamate **6f**:

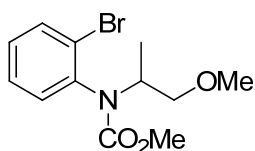

White solid, 87% yield, M.p. 39 °C,  $^1\text{H}$  NMR (400 MHz,  $\text{CDCl}_3$ ): 0.98 (d,  $J = 6.8$  Hz, 2H), 1.39 (d,  $J = 6.8$  Hz, 1H), 3.27 (s, 1.3H), 3.39 (s, 1.7H), 3.42 (d,  $J = 6.4$  Hz, 2H), 3.61 (s, 2.4H), 3.74-3.85 (m, 0.6H), 4.00-4.12 (m, 0.3H), 4.40-4.80 (m, 0.7H), 7.25-7.34 (m, 2H), 7.60 (t,  $J = 7.6$  Hz, 1H).  $^{13}\text{C}$  NMR (100 MHz):  $\delta = 14.4, 16.7, 52.7, 52.9, 53.1, 73.9, 74.8, 124.9, 126.2, 128.0, 128.1, 128.7, 129.1, 130.9, 131.4, 133.3, 133.3, 155.0, 155.8$ . MS (ESI, 70 eV):  $m/z$  (%) = 302 ( $\text{M}+\text{H}$ ) $^+$ ; IR (neat):  $\nu = 728, 759, 786, 928, 958, 982, 1045, 1029, 1073, 1103, 1154, 1194, 1268, 1298, 1318, 1375, 1441, 1475, 1586, 1706, 2582, 2951$   $\text{cm}^{-1}$ ; HRMS calcd. for  $\text{C}_{12}\text{H}_{17}\text{BrNO}_3$  302.0386, found 302.0390.

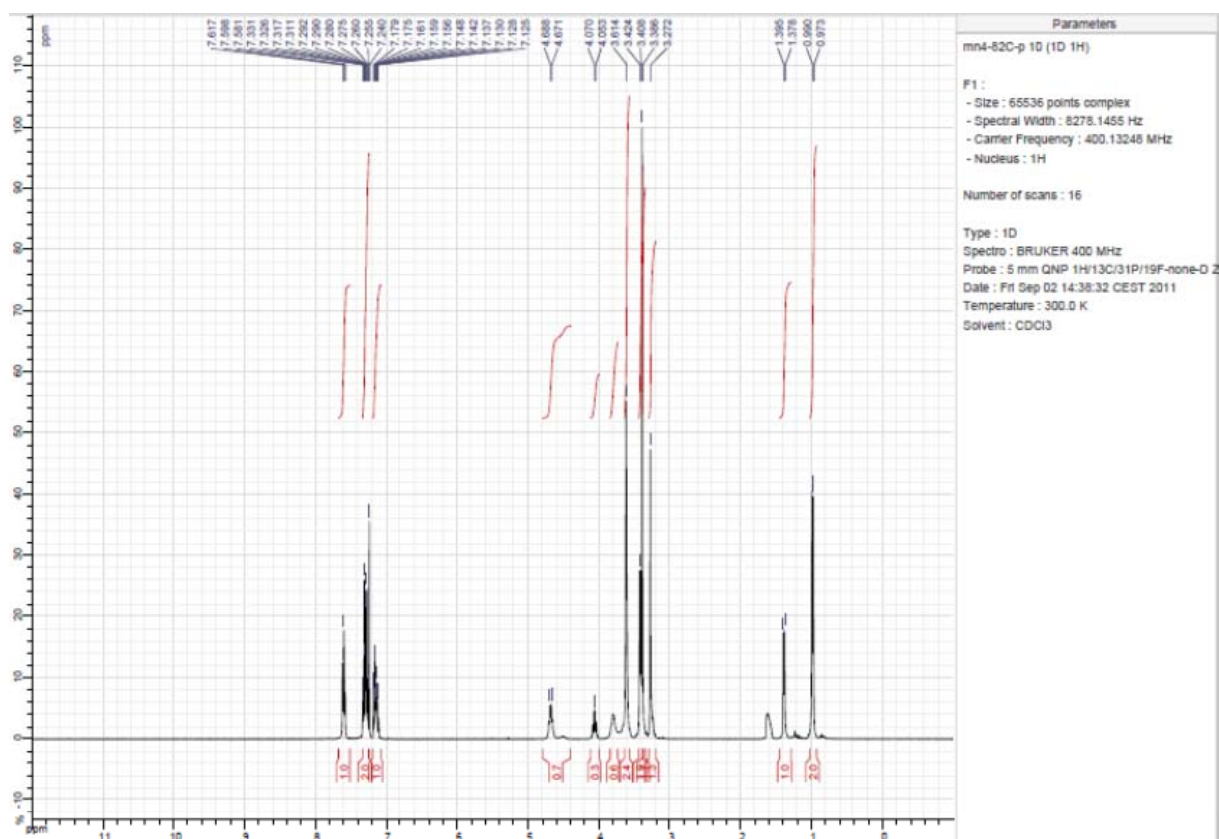

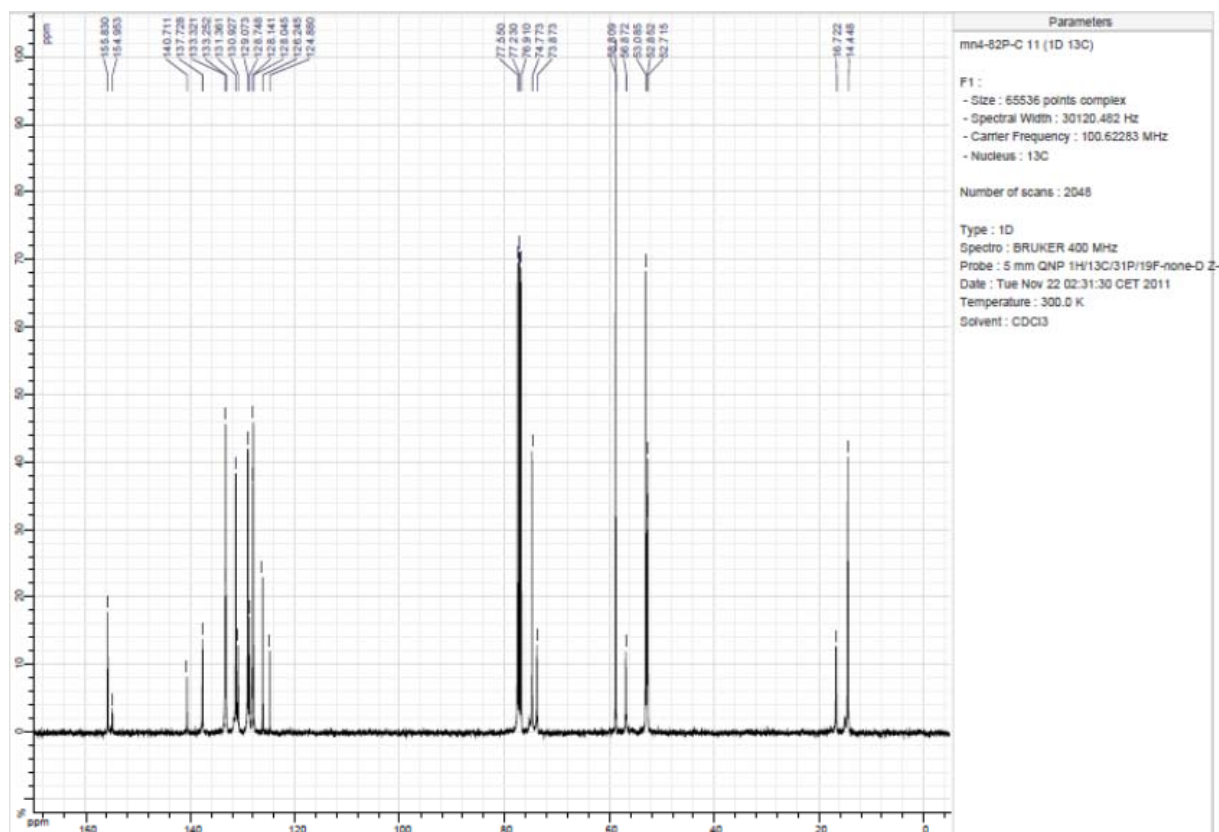

Methyl (2-bromophenyl)(1-phenylpropan-2-yl)carbamate **6g**:

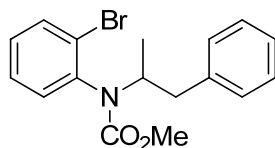

White solid, 97% yield, M.p. 102 °C,  $^1\text{H}$  NMR (400 MHz,  $\text{CDCl}_3$ ): 0.90 (d,  $J = 6.8$  Hz, 1.7H), 0.83 (d,  $J = 6.8$  Hz, 1.3H), 2.44 (dd,  $J = 12.8, 9.2$  Hz, 0.4H), 2.78 (dd,  $J = 12.8, 10$  Hz, 0.6H), 3.27 (dd,  $J = 12.8, 8.4$  Hz, 0.6H), 3.33-3.43 (m, 0.4H), 3.65 (s, 3H), 4.10-4.26 (m, 0.4H), 4.34-4.64 (m, 0.6H), 6.70 (d,  $J = 7.2$  Hz, 0.4H), 7.05-7.37 (m, 7.6H), 7.56-7.66 (m, 1H).  $^{13}\text{C}$  NMR (100 MHz):  $\delta = 16.3, 19.3, 40.8, 43.3, 53.0, 53.1, 56.3, 59.2, 125.3, 126.2, 126.6, 128.2, 128.2, 128.6, 128.9, 129.2, 129.6, 130.6, 130.7, 133.6, 138.9, 139.5, 140.3, 155.2, 155.6$ . MS (ESI, 70 eV):  $m/z$  (%) = 348 ( $\text{M}+\text{H}$ ) $^+$ ; IR (neat):  $\nu = 700, 729, 744, 761, 830, 860, 915, 951, 983, 1029, 1069, 1167, 1191, 1293, 1325, 1388, 1440, 1475, 1585, 1704, 2951, 2978, 3027, 3062$   $\text{cm}^{-1}$ ; HRMS calcd. for  $\text{C}_{17}\text{H}_{19}\text{BrNO}_2$  348.0593, found 348.0589.



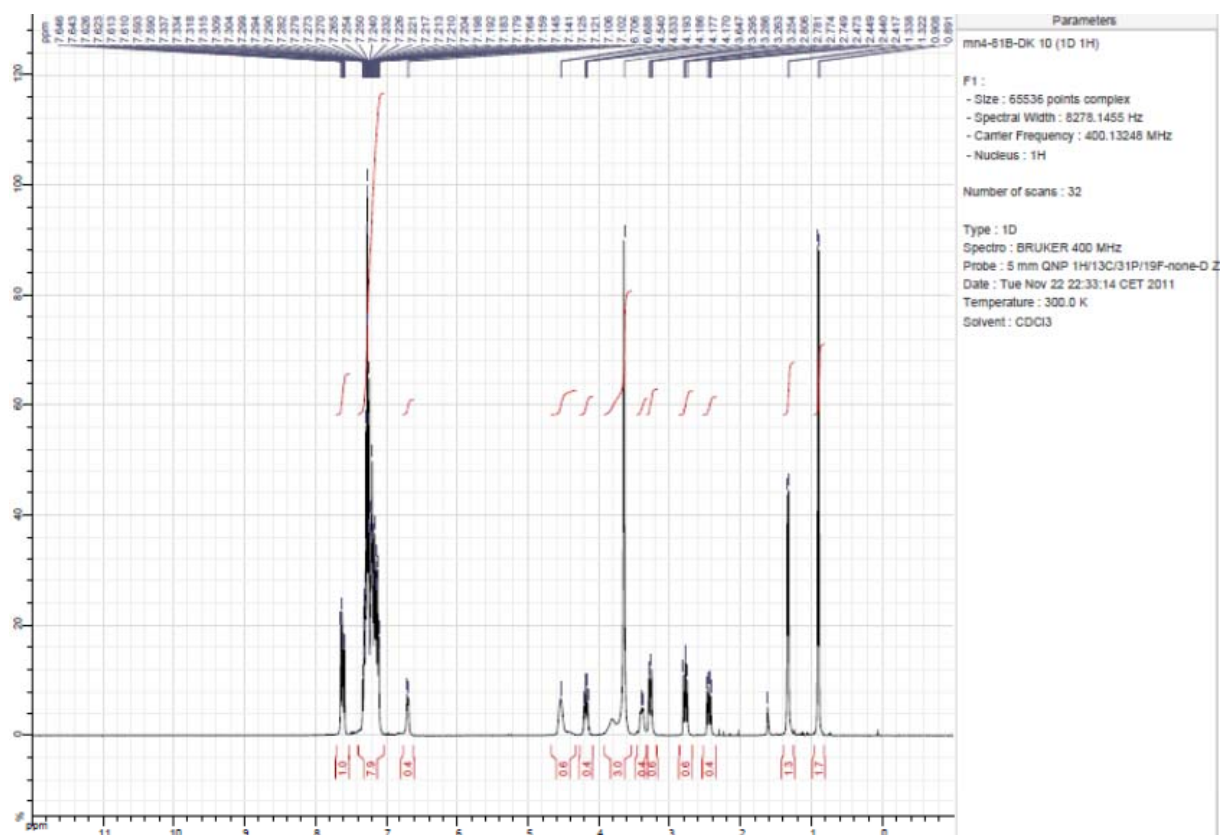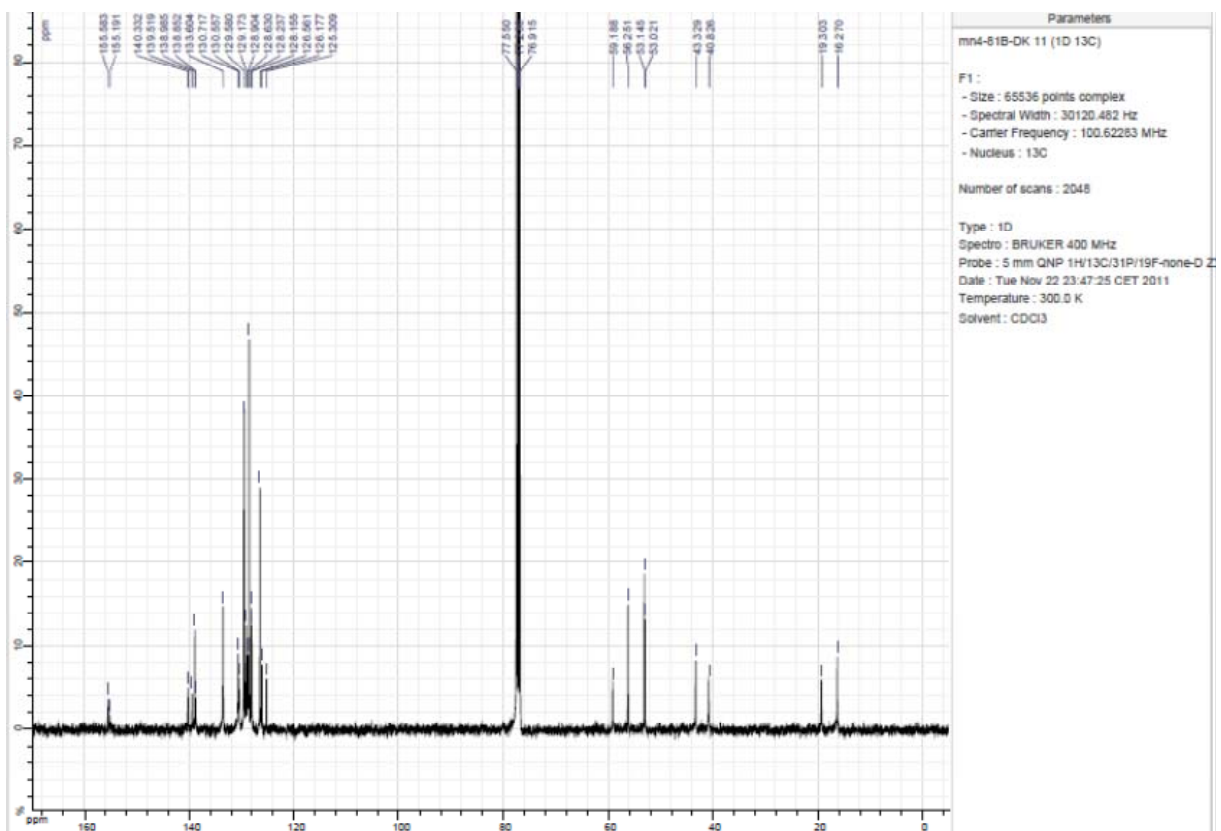

Methyl (2-bromophenyl)(4-methylpentan-2-yl)carbamate **6h**:

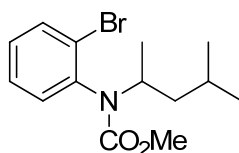

White solid, 91% yield, M.p. 51 °C,  $^1\text{H}$  NMR (400 MHz,  $\text{CDCl}_3$ ): 0.82-0.88 (m, 2.2H), 0.91-1.01 (m, 5.8H), 1.05-1.18 (m, 0.4H), 1.26-1.41 (m, 0.4H), 1.41-1.50 (m, 0.4H), 1.51-1.72 (m, 1.4H), 3.60 (s, 2.6H), 3.78 (s, 0.4H), 4.18-4.36 (brd, 0.4H), 4.44-4.60 (m, 0.6H), 7.10-7.20 (m, 2H), 7.26-7.34 (m, 1H), 7.62 (dt,  $J = 8, 1.6$  Hz, 1H).  $^{13}\text{C}$  NMR (100 MHz):  $\delta = ^{13}\text{C}$  NMR (100 MHz):  $\delta = 17.4, 20.2, 21.7, 22.3, 23.5, 23.8, 25.3, 25.4, 43.1, 46.2, 52.6, 52.9, 53.0, 53.9, 125.8, 126.4, 128.0, 128.8, 128.9, 130.5, 130.6, 133.6, 138.4, 139.5, 155.4, 155.7$ . MS (ESI, 70 eV):  $m/z$  (%) = 314 ( $\text{M}+\text{H}$ ) $^+$ ; IR (neat):  $\nu = 728, 757, 784, 950, 1030, 1061, 1108, 1168, 1191, 1264, 1290, 1317, 1366, 1389, 1400, 1474, 1585, 1705, 2954$   $\text{cm}^{-1}$ ; ESI-HRMS calcd. for  $\text{C}_{14}\text{H}_{21}\text{BrNO}$  314.0750, found 314.0748.

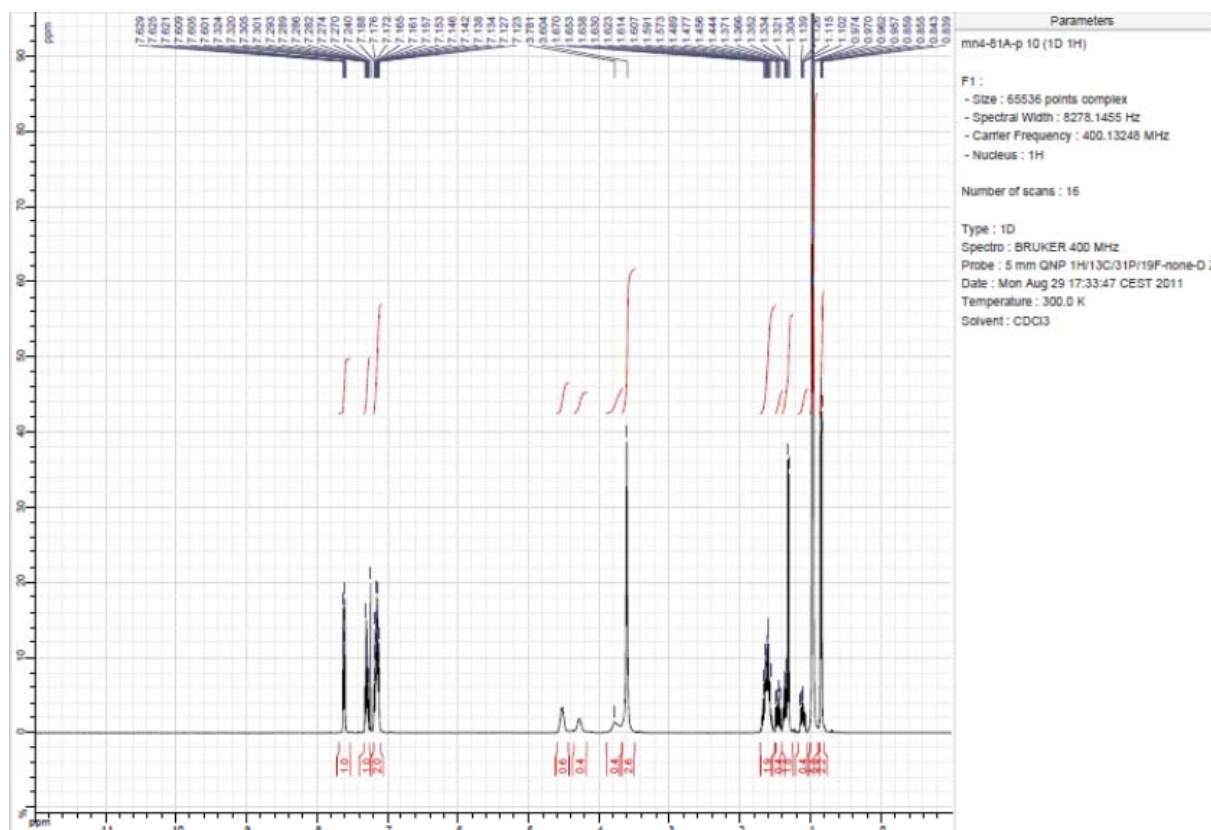

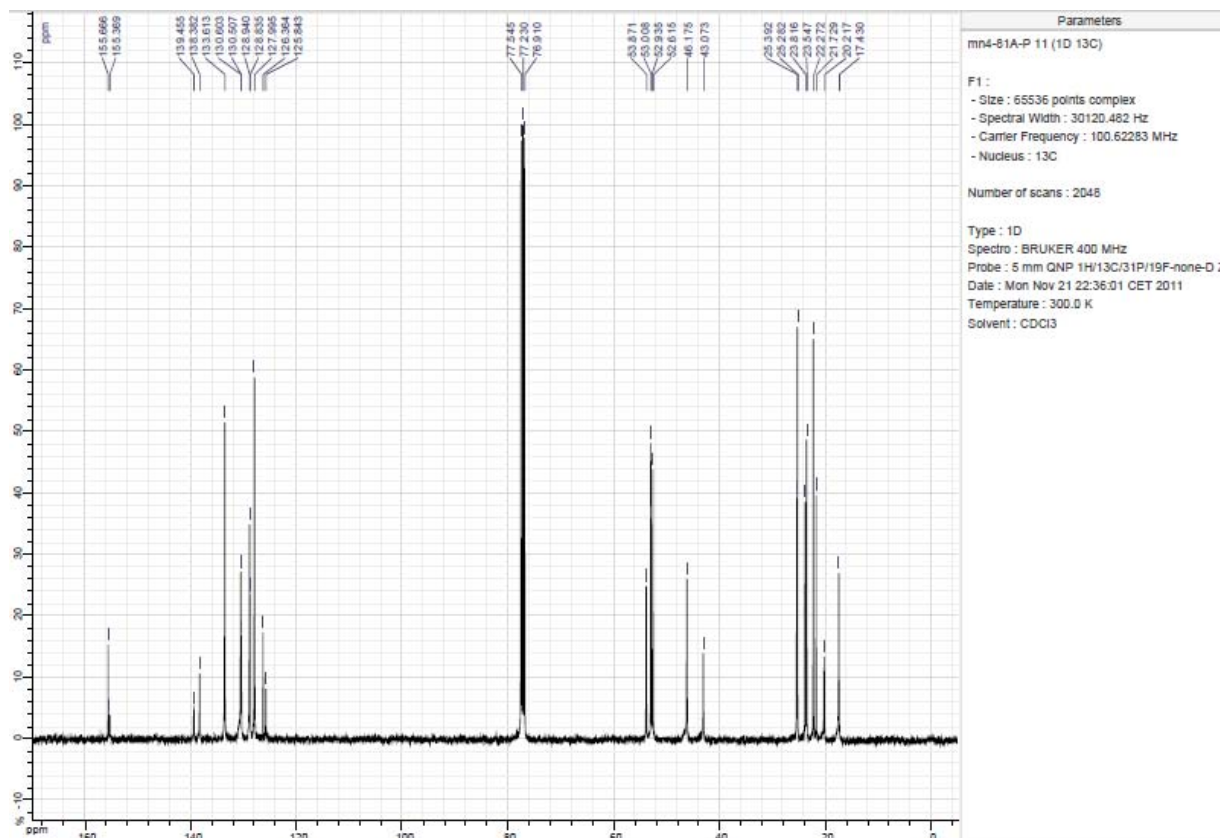

Methyl (2-bromophenyl)(1-cyclohexylpropan-2-yl)carbamate **6i**:

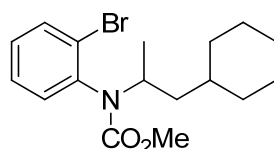

White solid, 94% yield, M.p. 59 °C,  $^1\text{H}$  NMR (400 MHz,  $\text{CDCl}_3$ ): 0.75-1.40 (m, 11.1H), 1.44-1.87 (m, 5.9H), 3.60 (s, 3H), 4.21-4.36 (m, 0.4H), 4.42-4.64 (m, 0.6H), 7.08-7.21 (m, 2H), 7.25-7.33 (m, 1H), 7.56-7.66 (m, 1H).  $^{13}\text{C}$  NMR (100 MHz):  $\delta$  = 17.6, 20.4, 26.4, 26.5, 26.6, 26.8, 26.8, 41.6, 44.8, 52.1, 53.0, 53.0, 53.3, 125.8, 126.4, 128.0, 128.8, 128.9, 130.4, 130.6, 133.6, 138.5, 139.6, 155.4, 155.6. MS (ESI, 70 eV):  $m/z$  (%) = 354 ( $\text{M}+\text{H}$ ) $^+$ ; IR (neat):  $\nu$  = 728, 755, 843, 877, 950, 1030, 1068, 1115, 1190, 1264, 1286, 1314, 1370, 1391, 1440, 1475, 1586, 1606, 2850, 2921  $\text{cm}^{-1}$ ; ESI-HRMS calcd. for  $\text{C}_{17}\text{H}_{25}\text{BrNO}_2$  354.1063, found 354.1054.

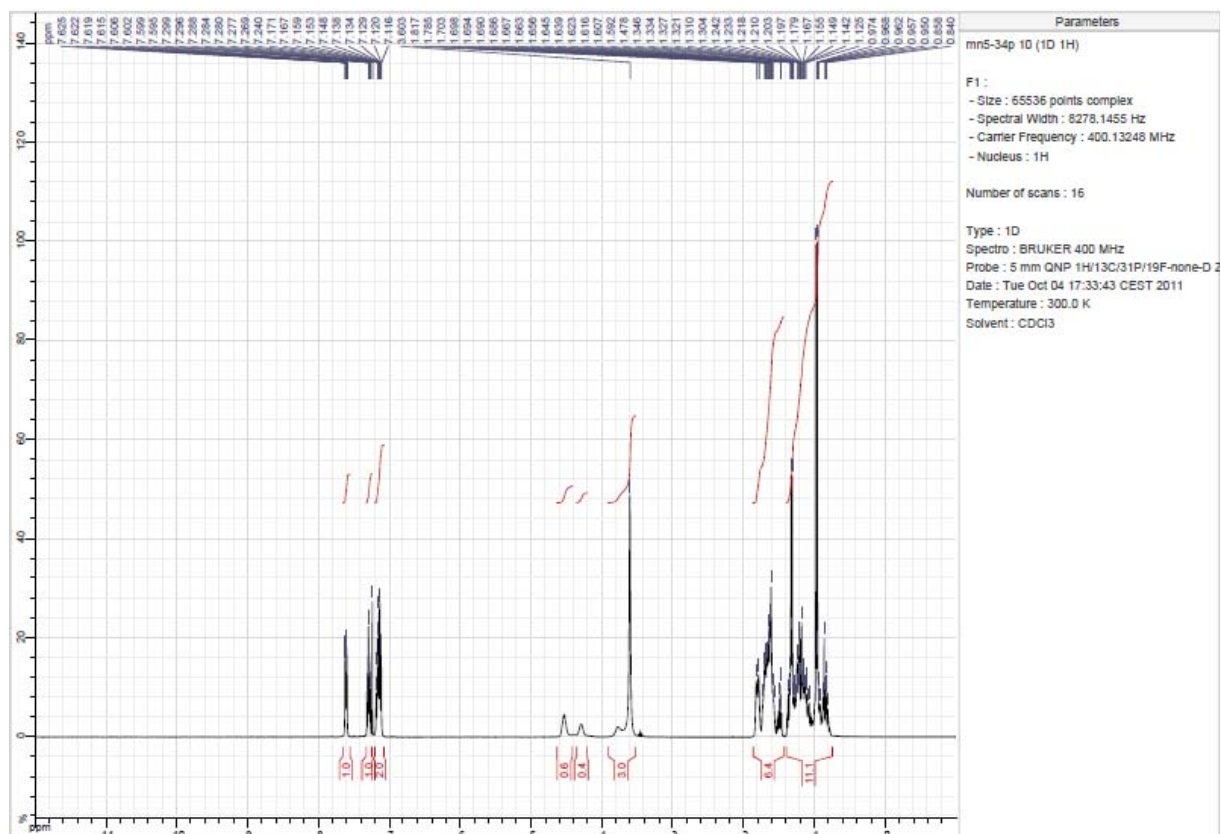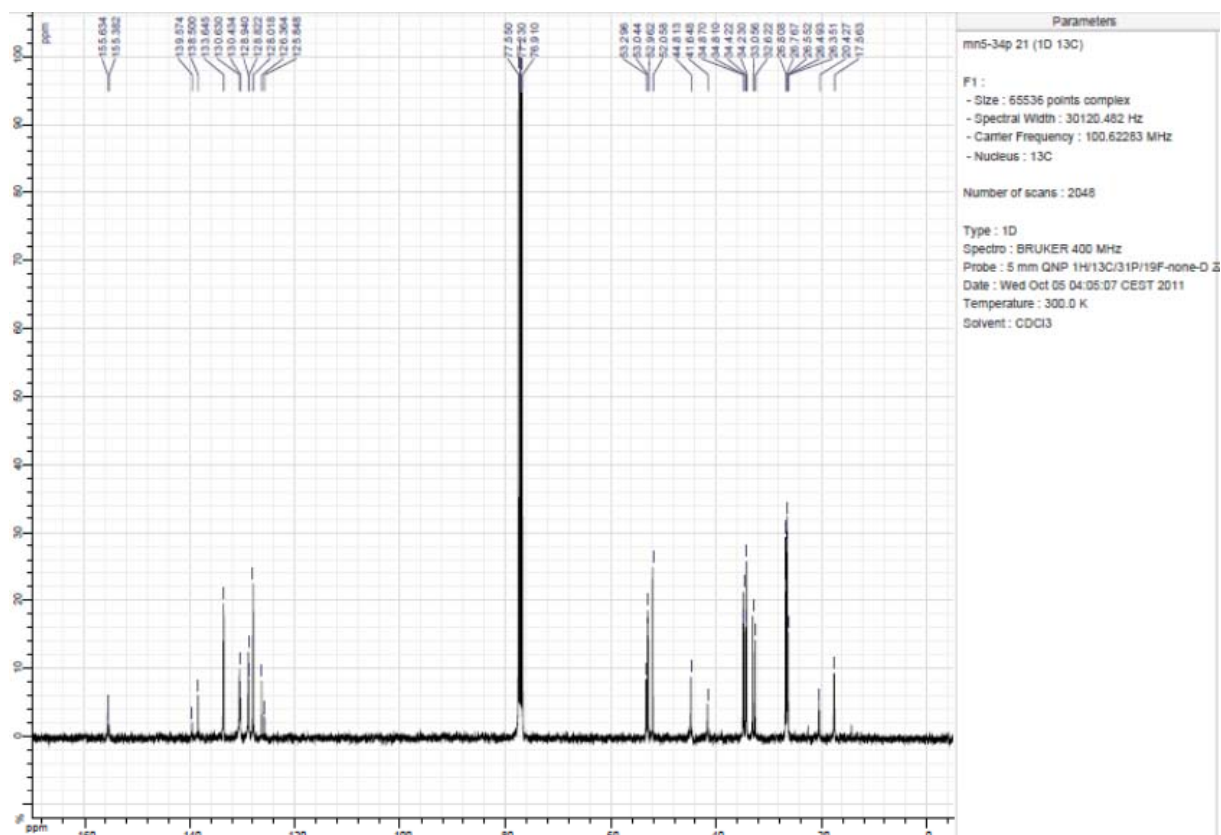

Methyl (2-bromophenyl)(3-methylbutan-2-yl)carbamate **6j**:

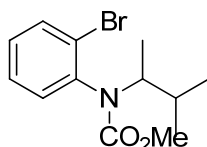

Colorless oil, 88% yield,  $^1\text{H}$  NMR (400 MHz,  $\text{CDCl}_3$ ): 0.80 (d,  $J = 6.8$  Hz, 0.7H), 0.92 (d,  $J = 6.8$  Hz, 2.3H), 0.93 (d,  $J = 6.4$  Hz, 2.3H), 1.03 (d,  $J = 7.6$  Hz, 0.7H), 1.10 (d,  $J = 6.8$  Hz, 1H), 1.74-1.90 (m, 0.8H), 2.20-2.42 (m, 0.2H), 3.38-3.48 (m, 0.3 H), 3.62 (s, 3H), 4.14-4.32 (m, 0.7H), 7.08-7.23 (m, 2H), 7.30 (td,  $J = 7.6, 1.2$  Hz, 1H), 7.56-7.66 (m, 1H).  $^{13}\text{C}$  NMR (100 MHz):  $\delta$  14.9, 16.8, 19.7, 19.8, 20.3, 22.1, 31.2, 34.0, 52.8, 53.1, 59.9, 65.2, 124.8, 126.6, 128.0, 128.2, 128.4, 128.8, 130.1, 130.2, 133.6, 133.7, 138.6, 141.9, 155.1, 156.3. MS (ESI, 70 eV):  $m/z$  (%) = 300 ( $\text{M}+\text{H}$ ) $^+$ ; IR (neat):  $\nu = 731, 755, 900, 949, 986, 1031, 1054, 1092, 1109, 1160, 1191, 1262, 1306, 1383, 1440, 1474, 1585, 1706, 2875, 2964$   $\text{cm}^{-1}$ ; ESI-HRMS calcd. for  $\text{C}_{13}\text{H}_{19}\text{BrNO}_2$  300.0593, found 300.0583.

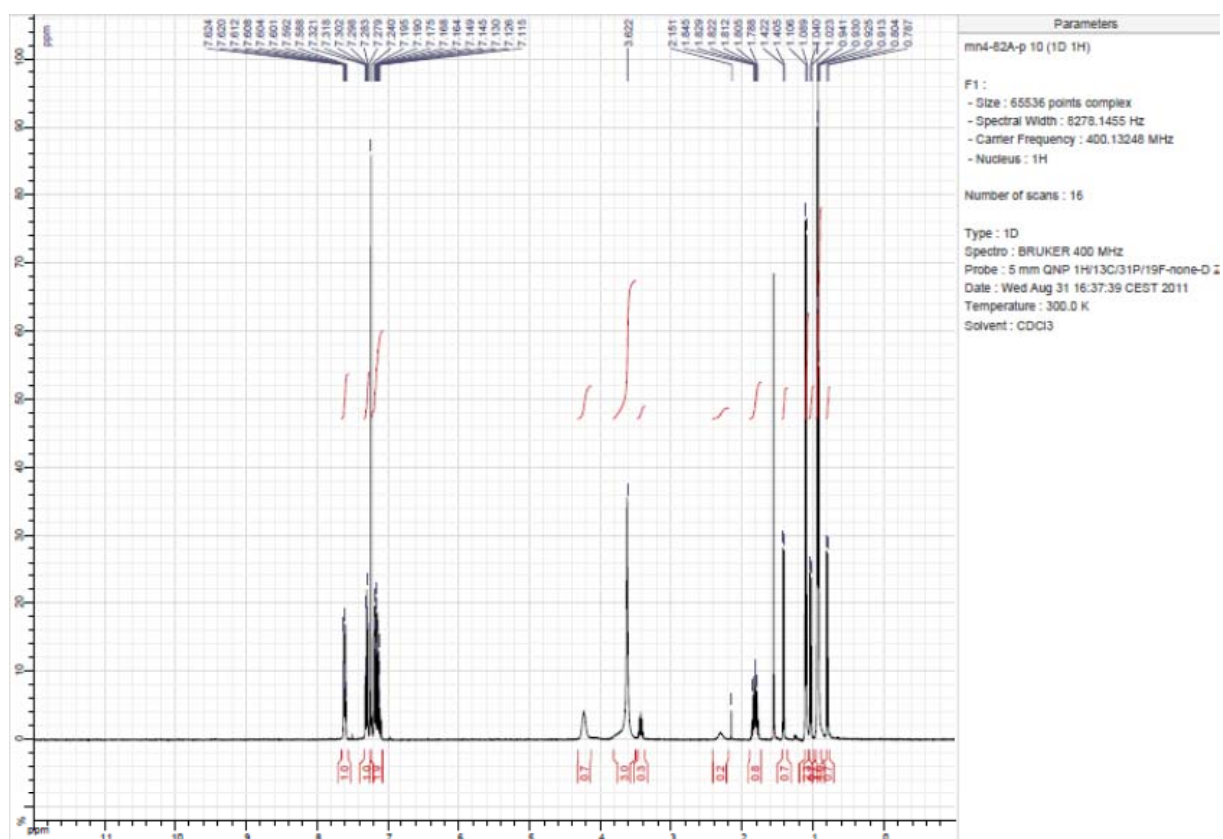

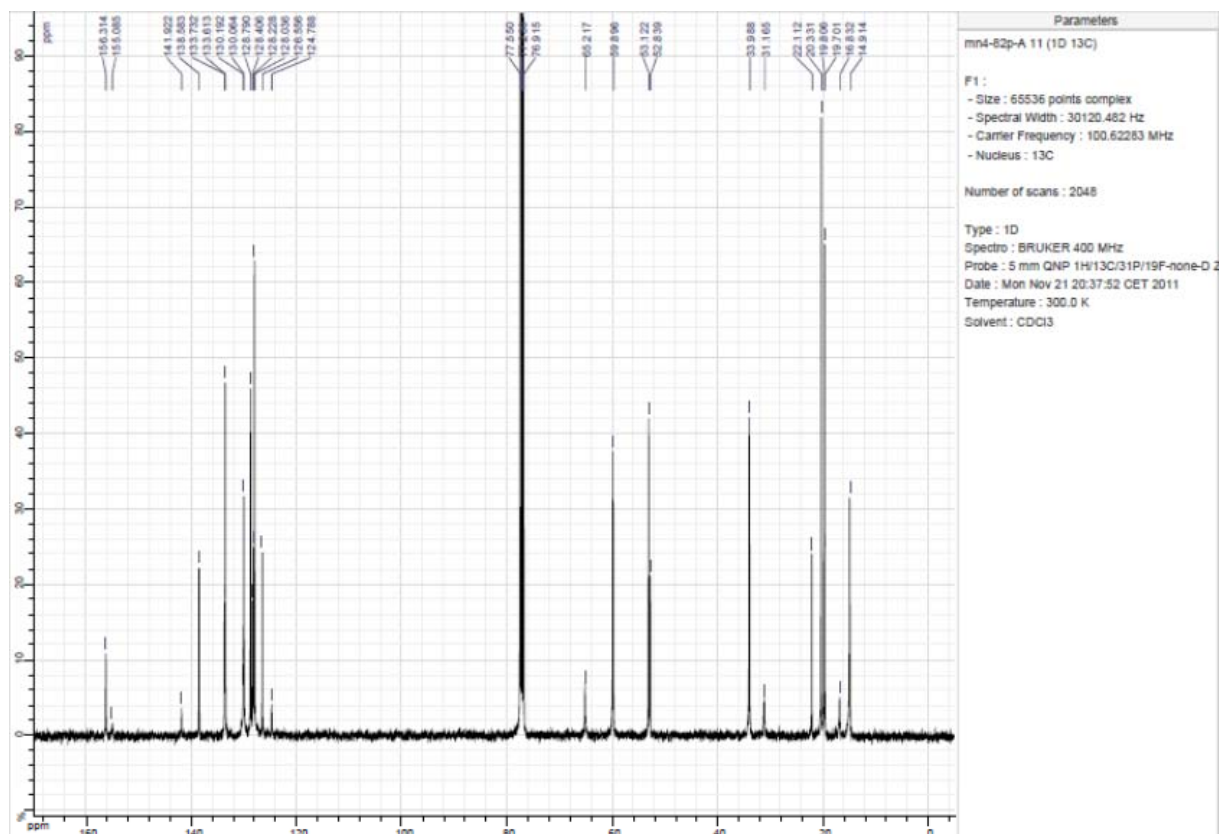

Methyl (2-bromophenyl)(3,3-dimethylbutan-2-yl)carbamate **6k**:

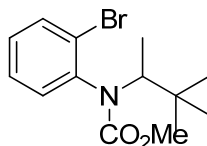

White solid, 48% yield, M.p. 67 °C, <sup>1</sup>H NMR (400 MHz, CDCl<sub>3</sub>): 0.92-1.06 (m, 11.6H), 1.52 (d, *J* = 7.2 Hz, 0.6H), 3.59 (s, 3H), 3.71-3.91 (m, 0.2H), 4.20-4.60 (m, 0.8H), 7.06-7.17 (m, 1H), 7.23-7.41 (m, 2H), 7.55-7.62 (m, 1H). <sup>13</sup>C NMR (100 MHz): δ = 12.6, 16.4, 27.8, 28.5, 36.6, 36.9, 53.0, 53.2, 57.0, 58.9, 62.1, 66.4, 126.7, 127.6, 127.8, 128.3, 128.7, 131.3, 133.5, 134.1, 140.2, 142.6, 156.0. MS (ESI, 70 eV): *m/z* (%) = 314 (M+H)<sup>+</sup>; IR (neat): ν = 731, 755, 900, 949, 986, 1031, 1054, 1092, 1109, 1160, 1191, 1261, 1306, 1283, 1440, 1474, 1585, 1706, 2875, 2964 cm<sup>-1</sup>; ESI-HRMS calcd. for C<sub>14</sub>H<sub>21</sub>BrNO<sub>2</sub> 314.0750, found 314.0752.

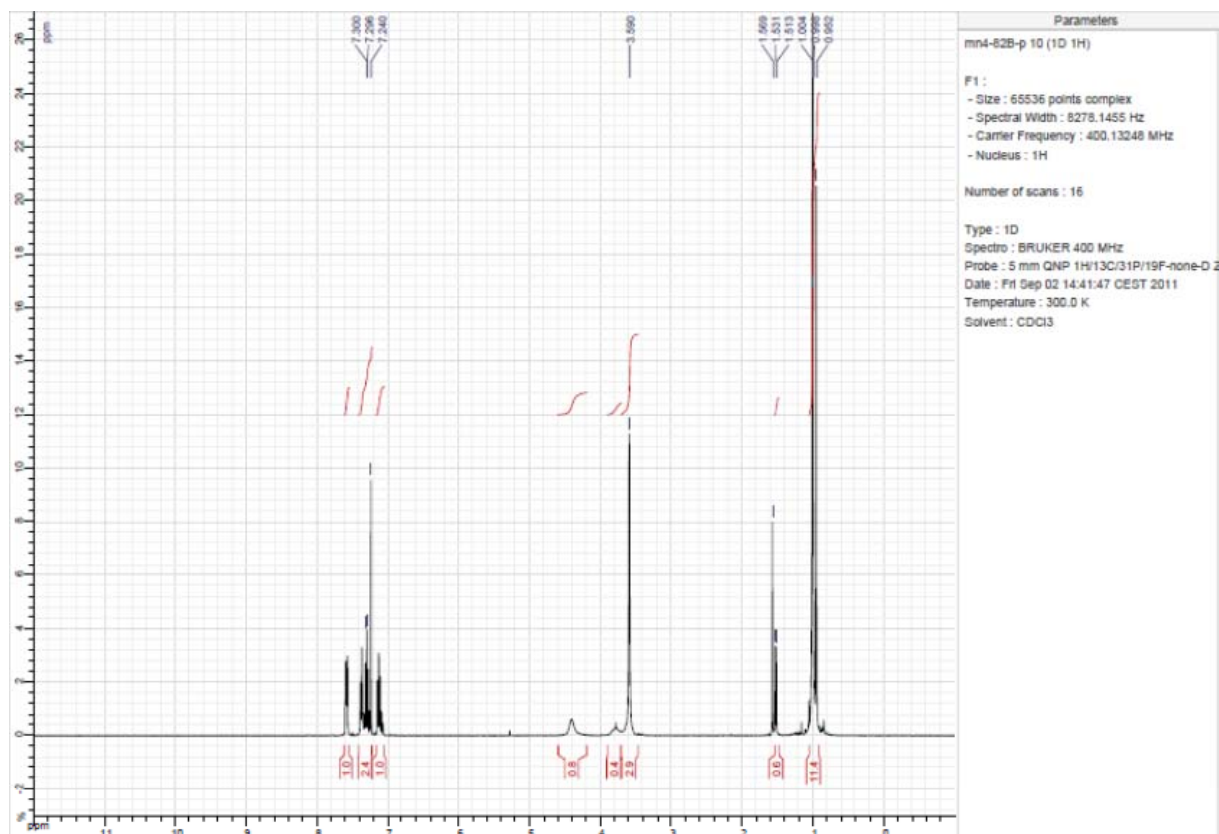

#### 1.4 Representative racemic synthesis of indolines 2 and 7:

Carbamate (0.2 mmol), Pd(OAc)<sub>2</sub> (4.5 mg, 0.02 mmol), pivalic acid (6.1 mg, 0.06 mmol), cesium carbonate (97.5 mg, 0.3 mmol), and PCy<sub>3</sub>·HBF<sub>4</sub> (14.7 mg, 0.04 mmol) were sequentially filled into a Schlenk flask. After the flask was evacuated and backfilled with nitrogen, dry xylenes were added under nitrogen and the resulting reaction mixture was stirred at 140 °C in the Schlenk tube behind a protective shield overnight (17-24 h). The reaction mixture was cooled to r.t. and diluted with dichloromethane (2 mL) followed by filtration through a pad of celite. The filtrate was evaporated by rotary evaporator and the volatiles were removed under vacuum. The residue was purified by f.c. (silica gel; diethyl acetate : pentane = 1 : 30 as eluent) to afford the racemic indoline.

#### 1.5 Racemic synthesis of indoline 7a using PCy<sub>3</sub>·HBF<sub>4</sub> as a ligand:

Substrate **6a** (57.2 mg, 0.2 mmol), Pd(OAc)<sub>2</sub> (4.5 mg, 0.02 mmol), pivalic acid (6.1 mg, 0.06 mmol), cesium carbonate (97.5 mg, 0.3 mmol), and PCy<sub>3</sub>·HBF<sub>4</sub> (14.7 mg, 0.04 mmol) were placed into a Schlenk flask. After the flask was evacuated and backfilled with nitrogen, dry xylenes 2 mL were added under nitrogen and the resulting reaction mixture was stirred at 140 °C in the Schlenk tube behind a protective shield for 17 hours. The reaction mixture was

cooled to r.t. and diluted with dichloromethane (2 mL) followed by filtration through a pad of celite. The filtrate was evaporated by rotary evaporator and the volatiles were removed under vacuum. The residue was purified by f.c. (silica gel; diethyl acetate : pentane = 1 : 30 as eluent) to afford the racemic indoline **7a** in 91% yield (37.3 mg).

**Racemic synthesis of indoline 7a using IPr·HCl as a ligand:**

Substrate **6a** (57.2 mg, 0.2 mmol), cesium carbonate (97.5 mg, 0.3 mmol), [Pd( $\pi$ -cinnamyl)Cl]<sub>2</sub> (5.2 mg, 0.01 mmol), cesium pivalate (46.8 mg, 0.2 mmol) and IPr·HCl (8.5 mg, 0.02 mmol) were placed in a Schlenk flask. After the flask was evacuated and backfilled with nitrogen, dry xylene (2 mL) was added under nitrogen. The resulting reaction mixture was stirred at 140 °C in the Schlenk tube behind a protective shield for 17 hours. The reaction mixture was cooled to r.t. and diluted with dichloromethane (2 mL) followed by filtration through the pad of celite. The filtrate was evaporated by rotary evaporator and the volatiles were removed under vacuum. The residue was purified by f.c.(silica gel; diethyl acetate : pentane = 1 : 30 as eluent) to afford the indoline **7a** in 91% yield (37.5 mg).

**1.6 Representative procedure for the asymmetric NHC-palladium catalyzed C-H activation:**

Carbamate **1a** (62.4 mg, 0.2 mmol), cesium carbonate (97.5 mg, 0.3 mmol), [Pd( $\pi$ -cinnamyl)Cl]<sub>2</sub> (2.6 mg, 0.005 mmol), cesium pivalate (46.8 mg, 0.2 mmol) and NHC·HI (0.01 mmol) were placed in a Schlenk flask. After the flask was evacuated and backfilled with nitrogen, dry mesitylene (2 mL) was added under nitrogen. The resulting reaction mixture was stirred at 160 °C in the Schlenk tube behind a protective shield for 3 hours. The reaction mixture was cooled to r.t. and diluted with dichloromethane (2 mL) followed by filtration through a pad of celite. The filtrate was evaporated by rotary evaporator and the volatiles were removed under vacuum. The residue was purified by f.c.(silica gel; diethyl acetate : pentane = 1 : 30 as eluent) to afford the indoline methyl carbamate **2a**.



## 1.7 Synthesis, spectra, analysis of substrates 2a-d and 7a-h, and 8a-h

(*S*)-methyl 2-methylindoline-1-carboxylate **2a**:<sup>[3]</sup>

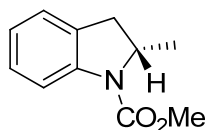

Colorless oil, 84% yield (32.1 mg), 90% *ee*, <sup>1</sup>H NMR (400 MHz, CDCl<sub>3</sub>): 1.27 (d, *J* = 7.2 Hz, 1H), 2.62 (dd, *J* = 16, 2 Hz, 1H), 3.35 (dd, *J* = 16, 9.6 Hz, 1H), 3.83 (s, 3H), 4.40-4.65 (m, 1H), 6.57 (t, *J* = 7.2 Hz, 1H), 7.14 (d, *J* = 7.6 Hz, 1H), 7.17 (t, *J* = 7.6 Hz, 1H), 7.44-8.10 (brd, 1H).

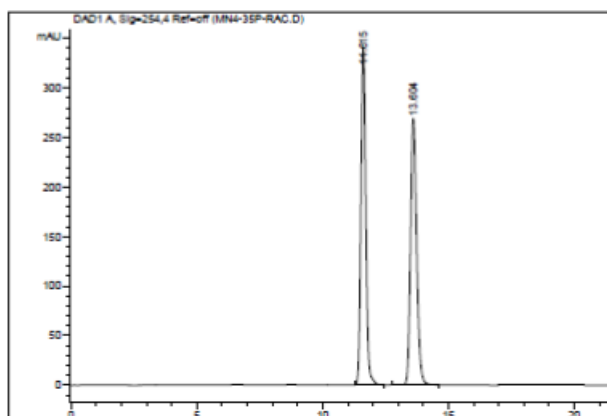

Area Percent Report

Sorted By : Signal  
Multiplier : 1.0000  
Dilution : 1.0000  
Use Multiplier & Dilution Factor with ISTDs

Signal 1: DAD1 A, Sig-254,4 Ref-off

| Peak #   | RetTime [min] | Type | Width [min] | Area [mAU*s] | Height [mAU] | Area %  |
|----------|---------------|------|-------------|--------------|--------------|---------|
| 1        | 11.615        | BB   | 0.2055      | 4543.38916   | 340.79941    | 50.1157 |
| 2        | 13.604        | BB   | 0.2601      | 4522.40381   | 268.98697    | 49.8843 |
| Totals : |               |      |             | 9065.79297   | 609.78638    |         |

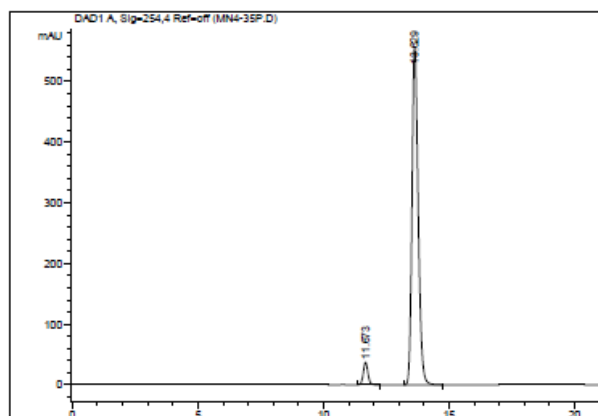

Area Percent Report

Sorted By : Signal  
Multiplier : 1.0000  
Dilution : 1.0000  
Use Multiplier & Dilution Factor with ISTDs

Signal 1: DAD1 A, Sig-254,4 Ref-off

| Peak #   | RetTime [min] | Type | Width [min] | Area [mAU*s] | Height [mAU] | Area %  |
|----------|---------------|------|-------------|--------------|--------------|---------|
| 1        | 11.673        | BB   | 0.1985      | 483.13275    | 37.44048     | 4.8096  |
| 2        | 13.629        | BB   | 0.2643      | 9562.10547   | 557.08234    | 95.1904 |
| Totals : |               |      |             | 1.00452e4    | 594.52282    |         |

The enantiomer ratio was determined by HPLC: (chiral column: AS-H, *n*-hexane/ *i*-propanol = 99 : 1, 0.5 mL/min, 254 nm); *t*<sub>R</sub> = 11.7 min [minor] and 13.6 min [major]. [ $\alpha$ ]<sub>D</sub><sup>20</sup> = +52.0 (*c* = 0.5 in CH<sub>2</sub>Cl<sub>2</sub>).

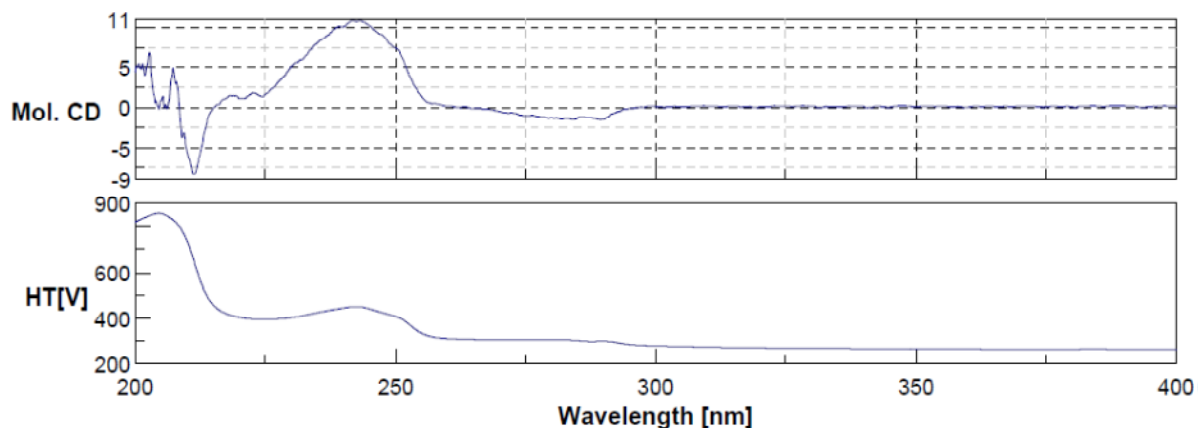

CD spectrum: 0.000052 M in *n*-hexane at 20 °C

(2*S*,3*R*)-methyl 2-ethyl-3-methylindoline-1-carboxylate **2b**:

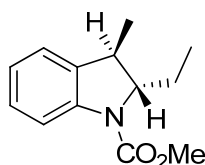

Colorless oil, 92% yield (40.3 mg), 97% *ee*,  $^1\text{H}$  NMR (400 MHz,  $\text{CDCl}_3$ ): 0.87 (t,  $J = 7.6$  Hz, 3H), 1.23 (d,  $J = 6.8$  Hz, 3H), 1.46-1.61 (m, 1H), 1.70-1.82 (m, 1H), 2.96 (qd,  $J = 6.8, 1.6$  Hz, 1H), 3.82 (s, 3H), 3.78-3.98 (m, 1H), 7.03 (s, 1H), 6.96 (t,  $J = 7.6$  Hz, 1H), 7.12 (d,  $J = 7.2$  Hz, 1H), 7.17 (d,  $J = 7.6$  Hz, 1H), 7.34-8.12 (brd, 1H).  $^{13}\text{C}$  NMR (100 MHz):  $\delta = 9.2, 22.8, 27.1, 40.2, 52.7, 66.9, 115.4, 123.0, 124.4, 127.8, 136.2, 136.4, 154.2$ . MS (ESI, 70 eV):  $m/z$  (%) = 220 ( $\text{M}+\text{H}$ ) $^+$ ; IR (neat):  $\nu = 753, 820, 1019, 1065, 1137, 1192, 1216, 1284, 1312, 1335, 1391, 1441, 1485, 1602, 1706, 2963$   $\text{cm}^{-1}$ ; ESI-HRMS calcd. for  $\text{C}_{13}\text{H}_{18}\text{NO}_2$  220.1332, found 220.1332.

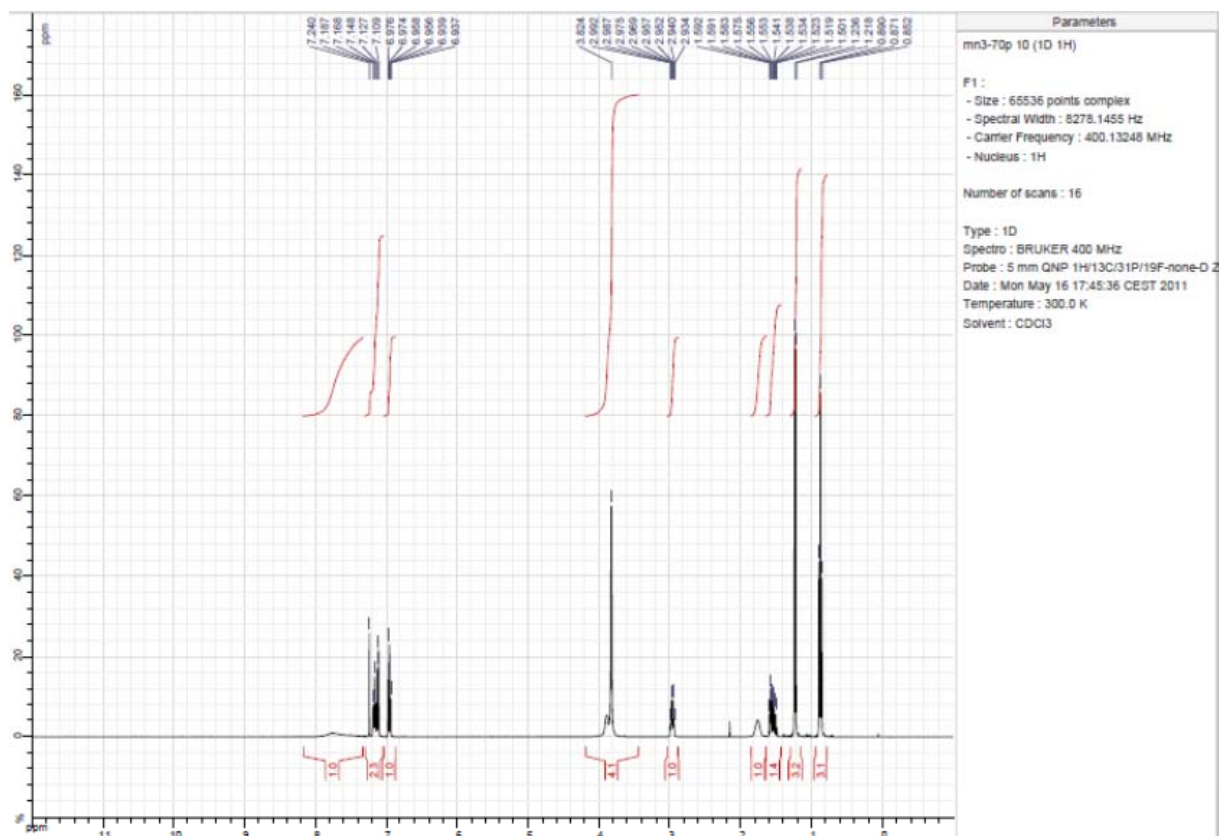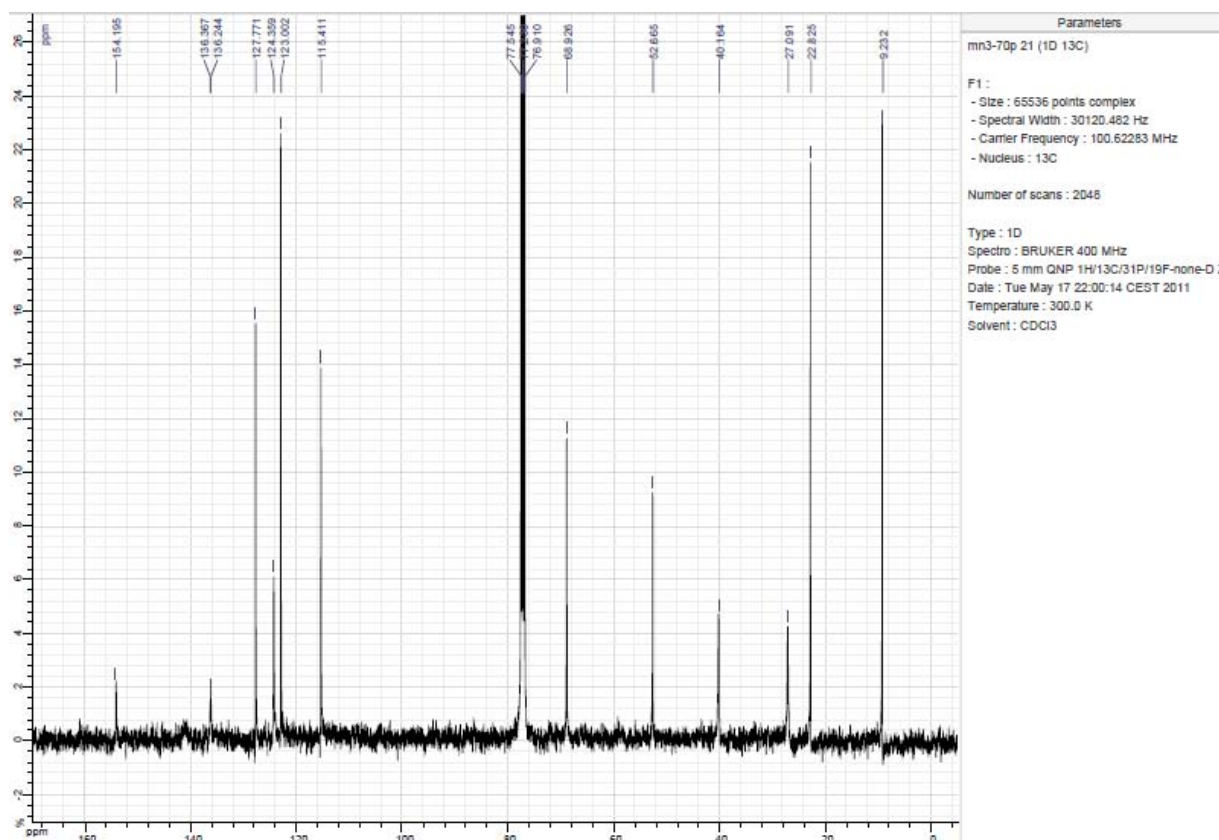

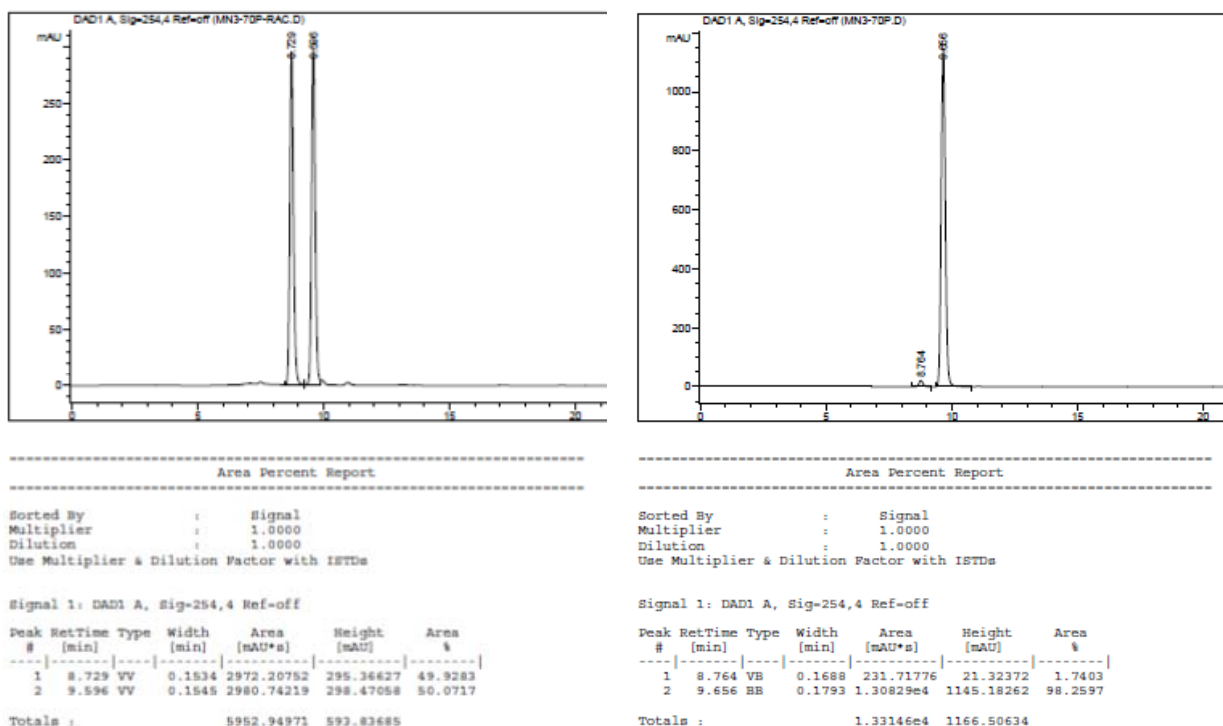

The ratio of enantiomers was determined by HPLC: (chiral column: AS-H, *n*-hexane/ *i*-propanol = 99 : 1, 0.5 mL/min, 254 nm);  $t_R = 8.7$  min [minor] and 9.6 min [major].  $[\alpha]_D^{20} = +6.3$  ( $c = 1.0$  in  $\text{CH}_2\text{Cl}_2$ ).

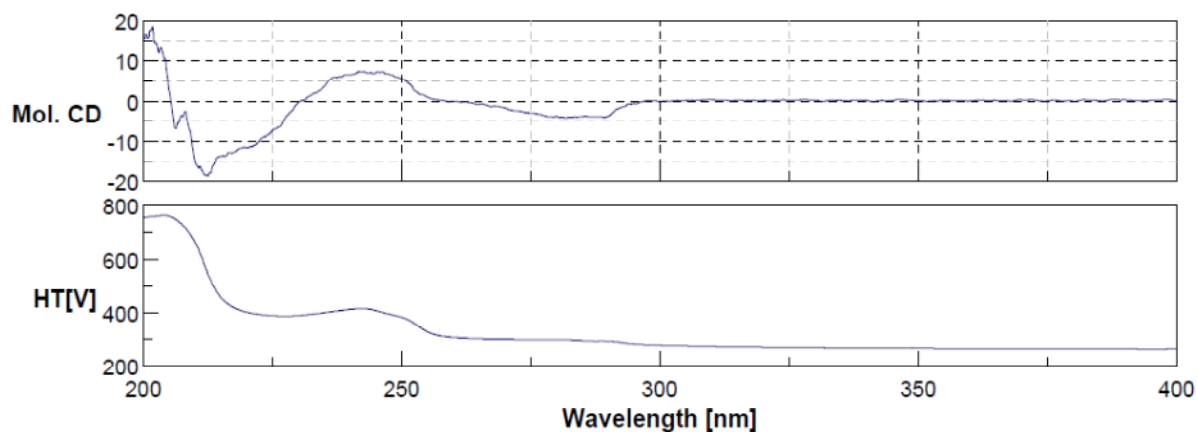

CD spectrum: 0.000023 M in *n*-hexane at 20 °C

(2*S*,3*R*)-methyl 3-ethyl-2-propylindoline-1-carboxylate **2c**:

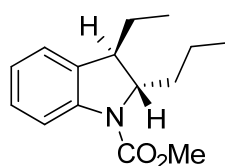

Colorless oil, 92% yield (45.4 mg), 97% *ee*,  $^1\text{H}$  NMR (400 MHz,  $\text{CDCl}_3$ ): 0.81-0.98 (m, 6H), 1.18-1.78 (m, 6H), 2.76 (t,  $J = 6.4$  Hz, 1H), 3.83 (s, 3H), 3.95-4.18 (m, 1H), 6.95 (td,  $J = 7.6$ , 0.8 Hz, 1H), 7.12 (d,  $J = 7.6$  Hz, 1H), 7.17 (t,  $J = 7.6$  Hz, 1H), 7.46-8.10 (m, 1H).  $^{13}\text{C}$  NMR (100 MHz):  $\delta = 11.3, 14.2, 18.2, 29.5, 31.1, 36.4, 36.8, 47.2, 47.6, 52.6, 65.0, 115.5, 122.8, 124.9, 125.2, 127.8, 134.7, 135.4, 140.8, 141.9, 153.9, 154.2$ . MS (ESI, 70 eV):  $m/z$  (%) = 248 ( $\text{M}+\text{H}$ ) $^+$ ; IR (neat):  $\nu = 748, 794, 869, 931, 1022, 1064, 1116, 1135, 1190, 1209, 1269, 1284, 1306, 1332, 1389, 1441, 1461, 1483, 1602, 1703, 2873, 2931, 2958$   $\text{cm}^{-1}$ ; ESI-HRMS calcd. for  $\text{C}_{15}\text{H}_{22}\text{NO}_2$  248.1645, found 248.1642.

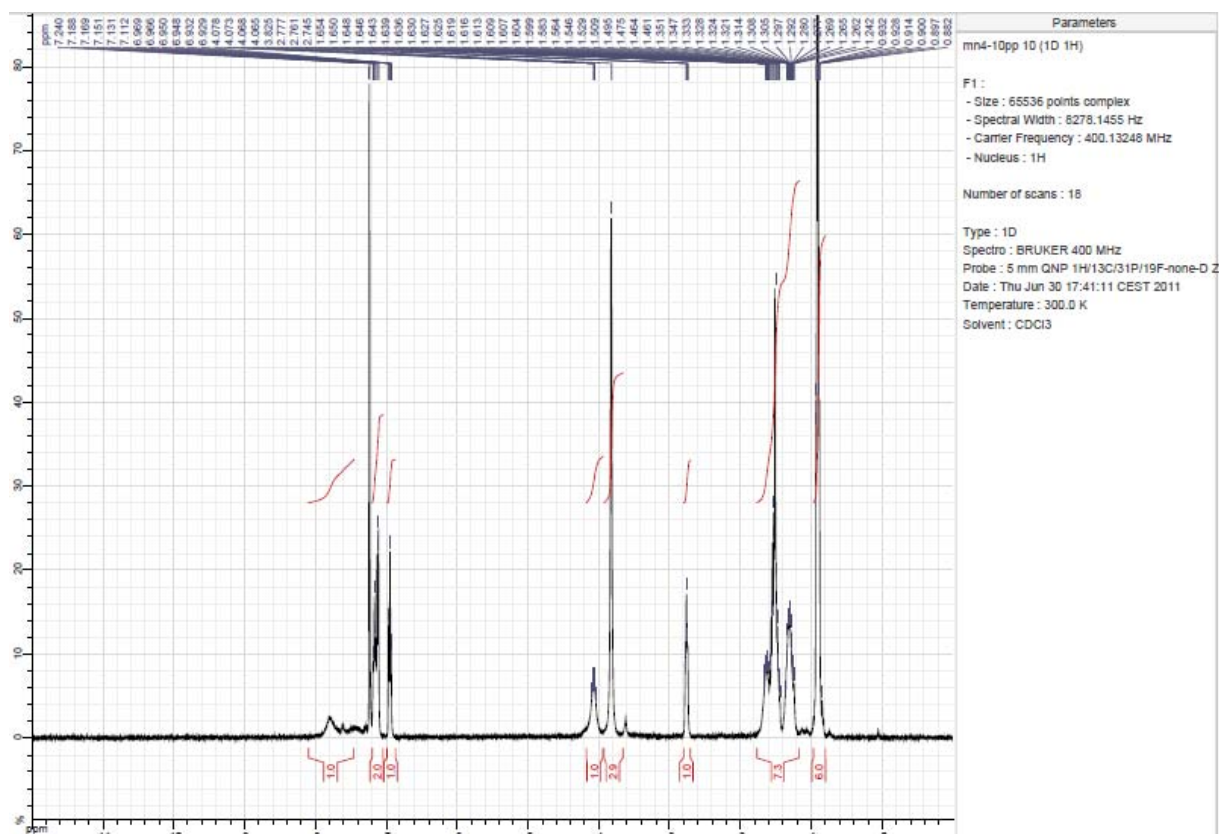

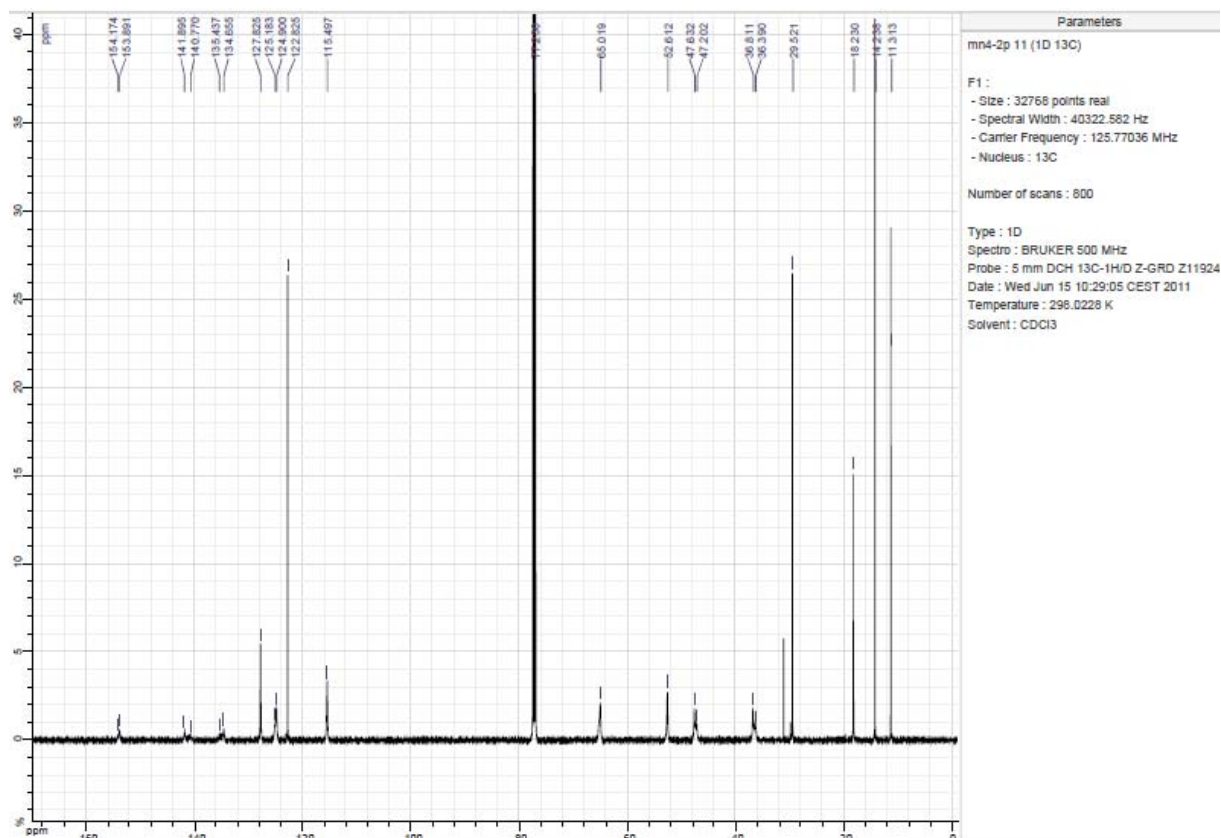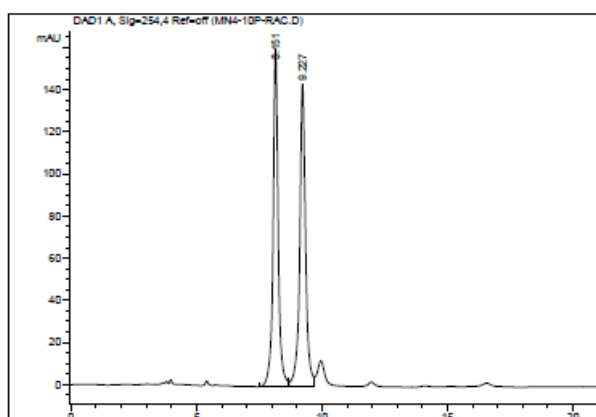

Area Percent Report

Sorted By : Signal

Multiplier : 1.0000

Dilution : 1.0000

Use Multiplier & Dilution Factor with ISTDs

Signal 1: DAD1 A, Sig=254,4 Ref-off

| Peak #   | RetTime [min] | Type | Width [min] | Area [mAU*s] | Height [mAU] | Area %  |
|----------|---------------|------|-------------|--------------|--------------|---------|
| 1        | 8.151         | BV   | 0.2100      | 2278.67578   | 160.18820    | 49.6975 |
| 2        | 9.227         | VV   | 0.2374      | 2306.41821   | 143.60440    | 50.3025 |
| Totals : |               |      |             | 4585.09399   | 303.79260    |         |

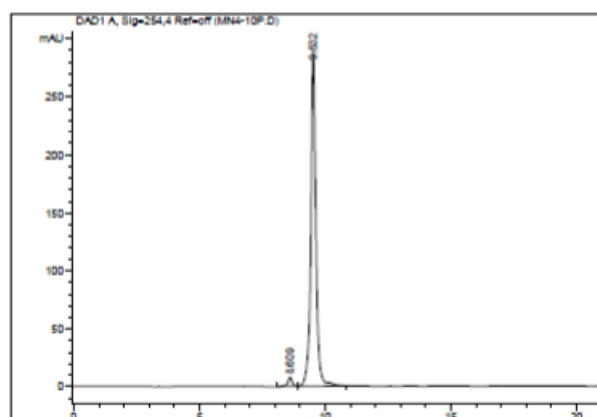

Area Percent Report

Sorted By : Signal

Multiplier : 1.0000

Dilution : 1.0000

Use Multiplier & Dilution Factor with ISTDs

Signal 1: DAD1 A, Sig=254,4 Ref-off

| Peak #   | RetTime [min] | Type | Width [min] | Area [mAU*s] | Height [mAU] | Area %  |
|----------|---------------|------|-------------|--------------|--------------|---------|
| 1        | 8.609         | BV   | 0.1815      | 96.41615     | 7.73317      | 2.3341  |
| 2        | 9.532         | VV   | 0.2040      | 4034.26855   | 290.59344    | 97.6659 |
| Totals : |               |      |             | 4130.68470   | 298.32661    |         |

The enantiomer ratio was determined by HPLC: (chiral column: (*R,R*)-Whelk-O1, *n*-hexane/*i*-propanol = 99.05 : 0.5, 1.0 mL/min, 254 nm);  $t_R = 8.2$  min [minor] and 9.3 min [major].  $[\alpha]_D^{20} = +9.0$  ( $c = 2.0$  in  $\text{CH}_2\text{Cl}_2$ ).

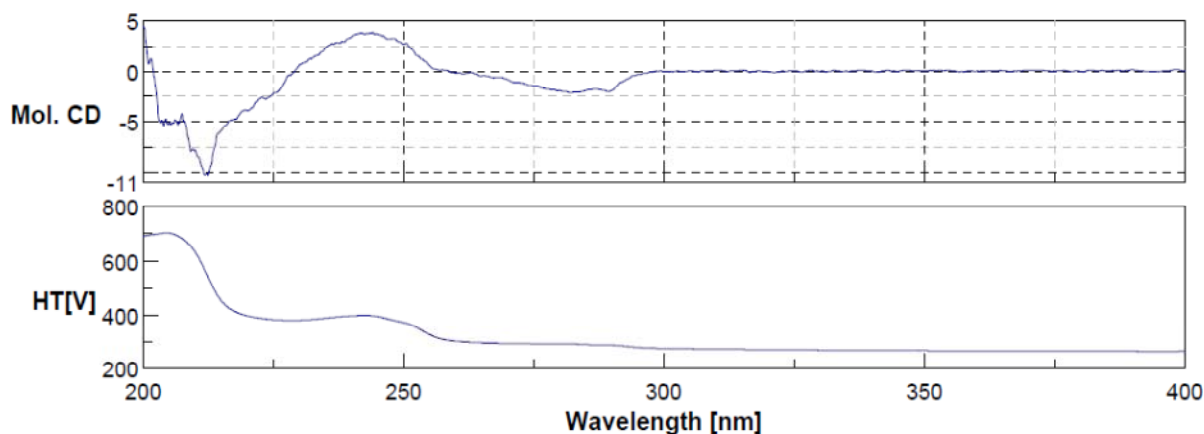

CD spectrum: 0.000049 M in *n*-hexane at 20 °C

(2*R*,3*S*)-methyl 2-benzyl-3-phenylindoline-1-carboxylate **2d**:

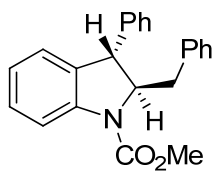

White solid, 82% yield (56.3 mg), M.p. 75 °C, 98% *ee*, <sup>1</sup>H NMR (400 MHz, CDCl<sub>3</sub>): 2.70 (dd, *J* = 12.8, 10.8 Hz, 1H), 3.20-3.50 (brd, 1H), 3.79 (s, 3H), 4.15 (s, 1H), 4.40-4.60 (m, 1H), 6.50-6.62 (m, 2H), 6.96-7.14 (m, 5H), 7.18-7.41 (m, 6H), 4.4-8.20 (brd, 1H). <sup>13</sup>C NMR (100 MHz):  $\delta$  = 40.6, 50.4, 52.8, 69.9, 115.7, 123.5, 126.3, 126.8, 126.9, 127.2, 128.6, 128.8, 128.8, 129.9, 132.9, 137.4, 144.1, 153.7. MS (ESI, 70 eV): *m/z* (%) = 344 (M+H)<sup>+</sup>; IR (neat):  $\nu$  = 698, 733, 757, 792, 849, 878, 919, 1057, 1079, 1136, 1157, 1193, 1246, 1278, 1304, 1342, 1390, 1441, 1484, 1598, 1711, 2952, 3027 cm<sup>-1</sup>; ESI-HRMS calcd. for C<sub>23</sub>H<sub>22</sub>NO<sub>2</sub> 344.1645, found 344.1648.

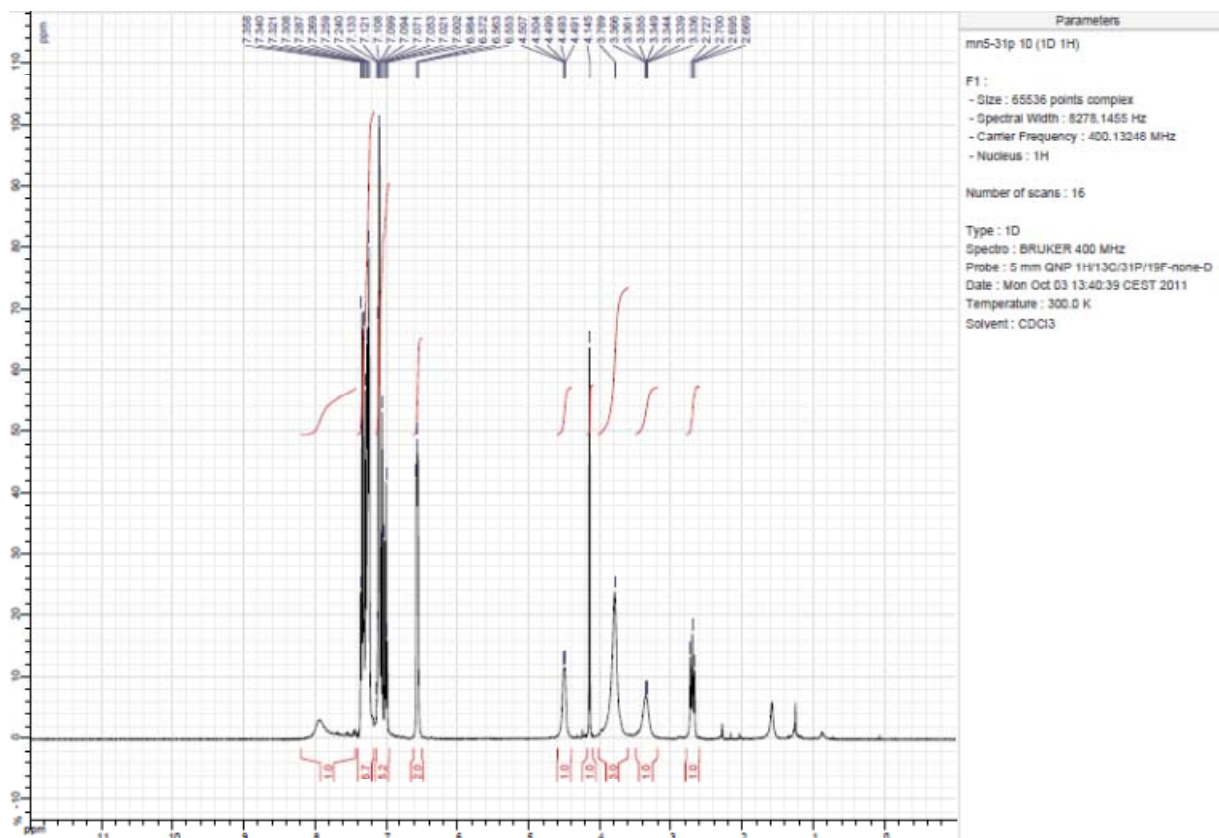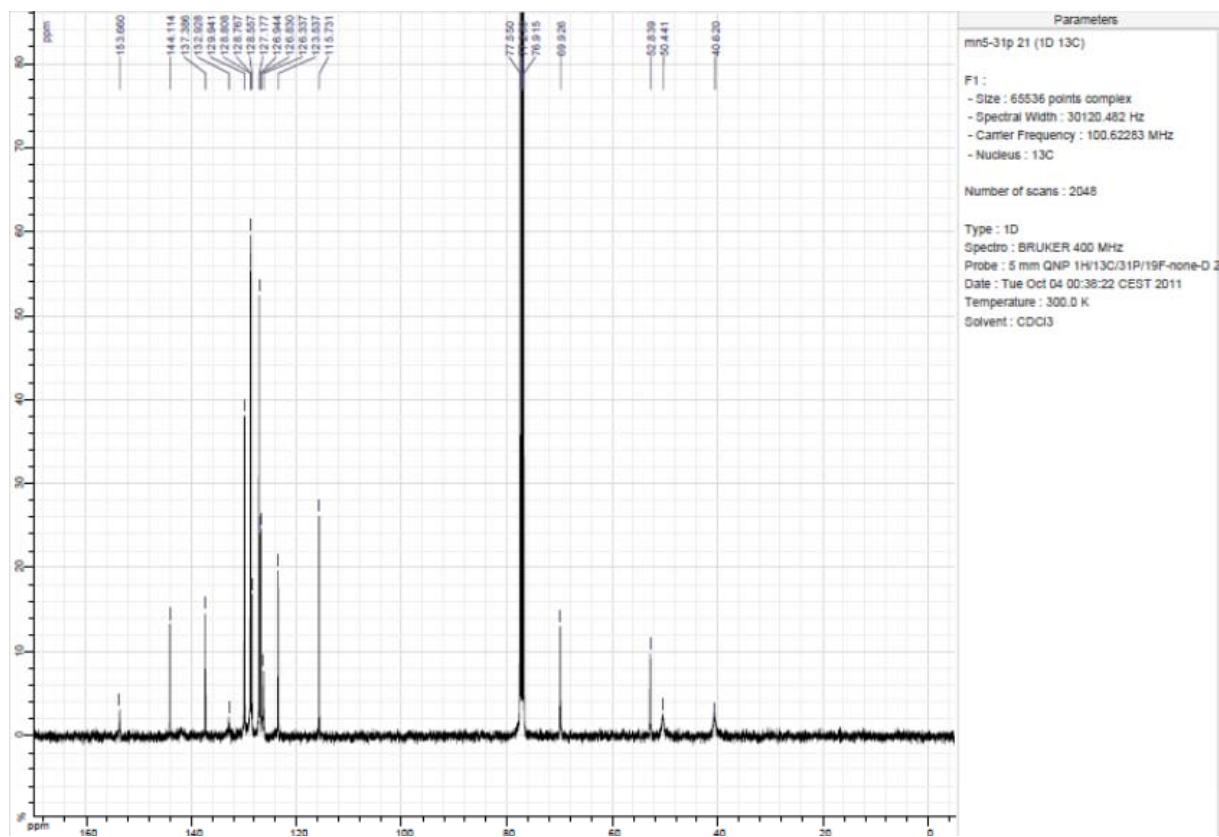



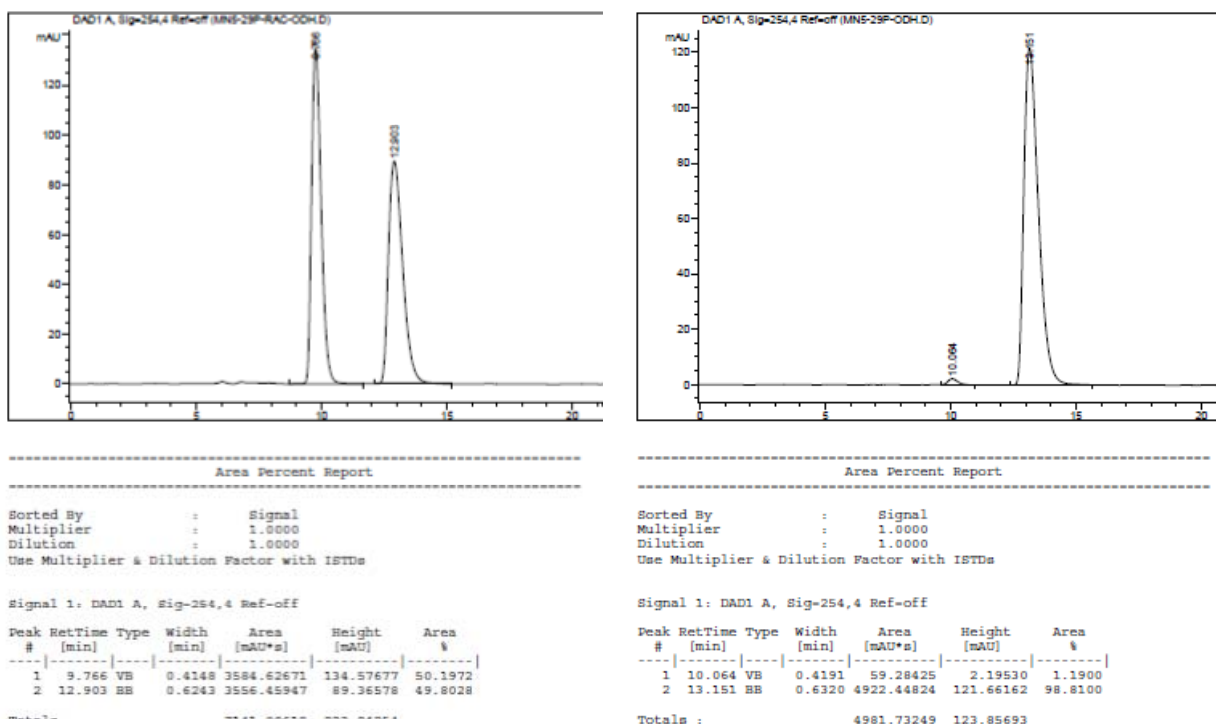

The ratio of enantiomers was determined by HPLC: (chiral column: OD-H, *n*-hexane/ *i*-propanol = 99 : 1, 1.0 mL/min, 254 nm);  $t_R = 10.1$  min [minor] and 13.2 min [major].  $[\alpha]_D^{20} = +107.8$  ( $c = 1.0$  in  $\text{CH}_2\text{Cl}_2$ ).

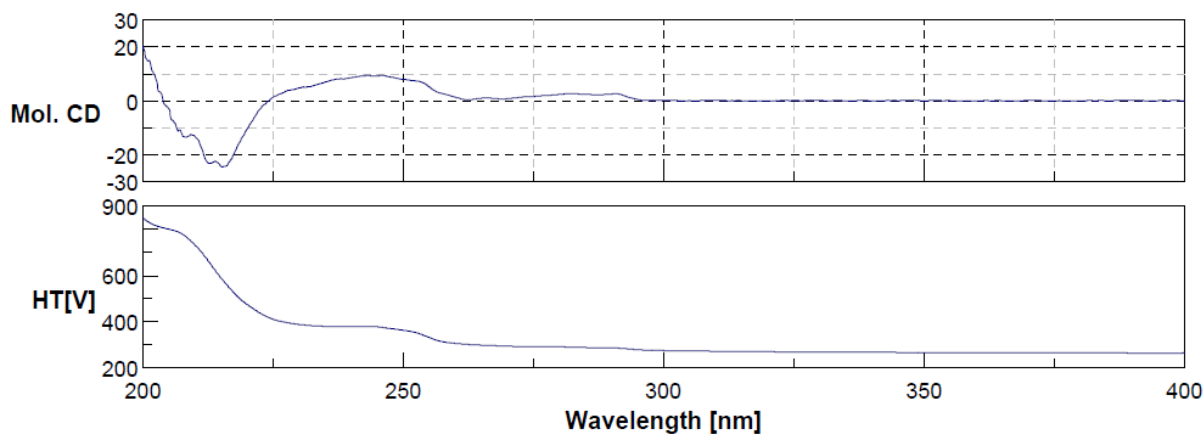

CD spectrum: 0.000052 M in *n*-hexane at 20 °C

(*R*)-methyl 2-ethylindoline-1-carboxylate **7a**; (*S,S*)-NHC·HI (**3**) was used.

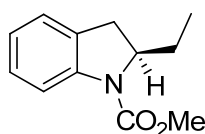

Colorless oil, 57% yield calcd. by NMR (23.2 mg), 77% *ee*,  $^1\text{H}$  NMR (400 MHz,  $\text{CDCl}_3$ ): 0.86 (t,  $J = 7.6$  Hz, 3H), 1.49-1.63 (m, 1H), 1.67-1.87 (m, 1H), 2.74 (dd,  $J = 16, 2.4$  Hz, 1H), 3.27 (dd,  $J = 16, 9.6$  Hz, 1H), 3.82 (s, 3H), 4.28-4.46 (m, 1H), 6.94 (td,  $J = 7.2, 0.8$  Hz, 1H), 7.12 (d,  $J = 7.6$  Hz, 1H), 7.15 (t,  $J = 7.6$  Hz, 1H), 7.34-8.10 (m, 1H).

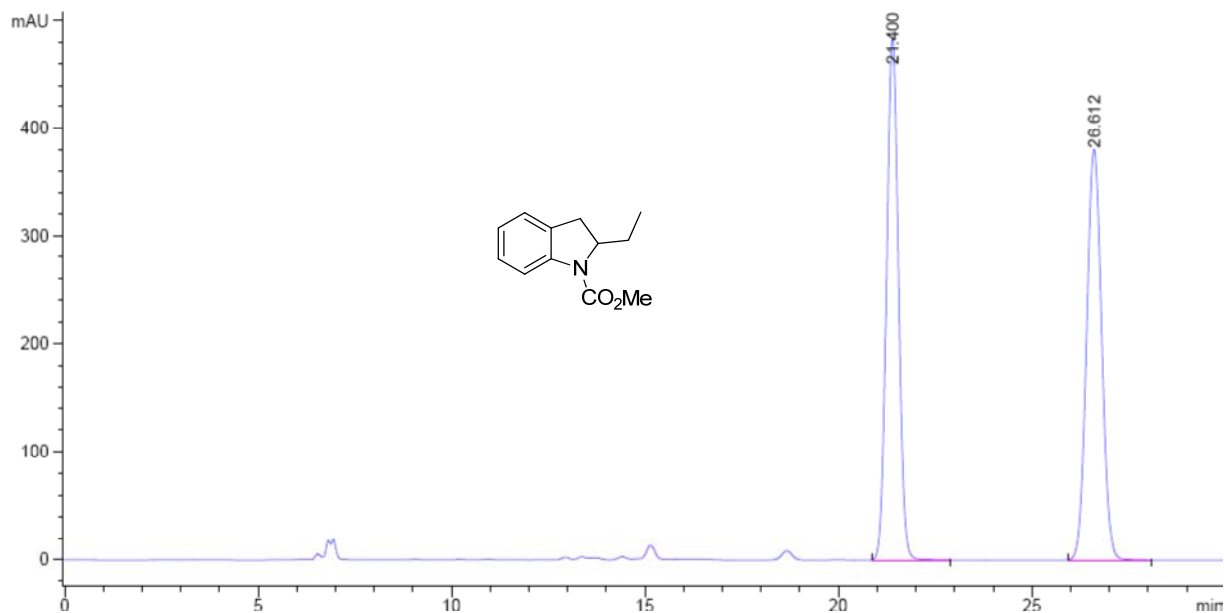

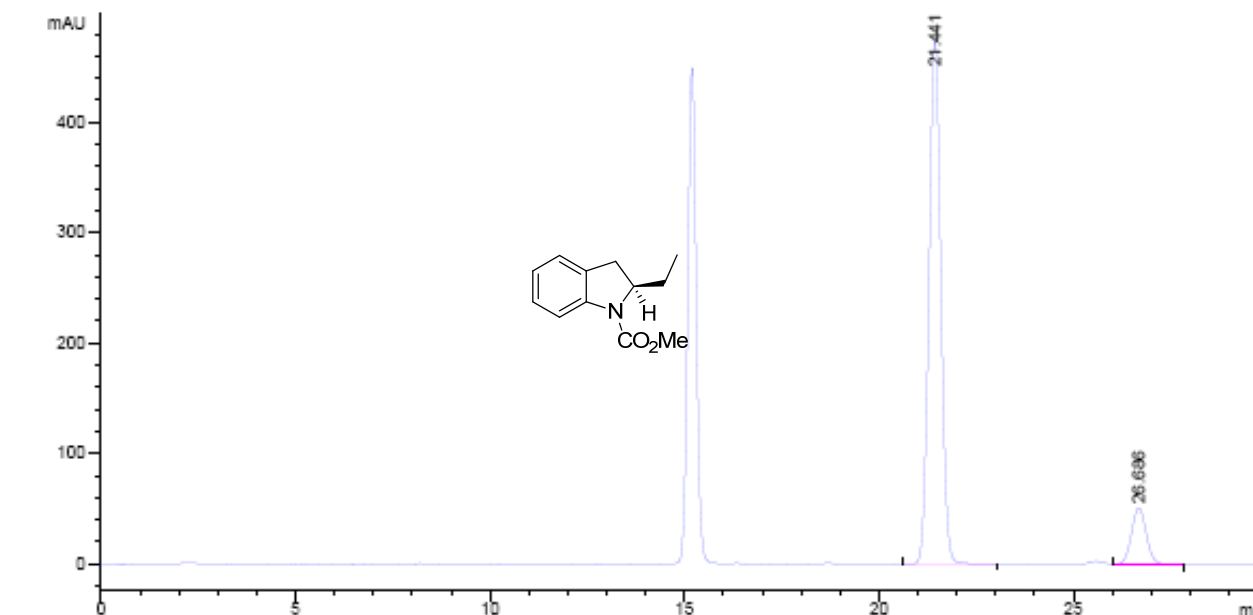

-----  
Area Percent Report  
-----

Sorted By : Signal  
Multiplier : 1.0000  
Dilution : 1.0000  
Use Multiplier & Dilution Factor with ISTDs

Signal 1: DAD1 A, Sig-254,4 Ref-off

| Peak # | RetTime [min] | Type | Width [min] | Area [mAU*s] | Height [mAU] | Area %  |
|--------|---------------|------|-------------|--------------|--------------|---------|
| 1      | 21.441        | BB   | 0.3470      | 1.01076e4    | 469.88608    | 88.2174 |
| 2      | 26.686        | VB   | 0.4205      | 1350.00818   | 51.04708     | 11.7826 |

Totals : 1.14576e4 520.93316

-----  
\*\*\* End of Report \*\*\*  
-----

76% *ee* [chiral column: AD-H, *n*-hexane/*i*-PrOH = 99 : 1, 0.5 mL/min, 254 nm;  $t_R$  = 21.44 min. (major) and 26.68 (minor)].

(*R*)-methyl 2-ethylindoline-1-carboxylate **7a** and (*2R,3S*)-methyl 2,3-dimethylindoline-1-carboxylate **8a**; (*S,S*)-NHC·HI (**3**) was used.

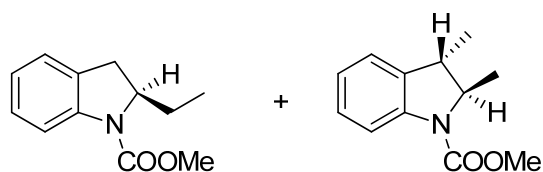

Colorless oil, **8a**: 38% yield calcd. by NMR (15.5 mg), **7a** + **8a**:  $^1\text{H}$  NMR (400 MHz,  $\text{CDCl}_3$ ):  $\delta$  0.88 (t,  $J$  = 7.4 Hz, 4H), 1.23 (d,  $J$  = 7.0 Hz, 2.6H), 1.29 (d,  $J$  = 6.3 Hz, 2.2H), 1.52-1.63 (m,

1.4H), 1.77 (brd, 1H), 2.76 (d,  $J = 16.0$  Hz, 1H), 2.85 (q,  $J = 6.8$  Hz, 0.65H), 3.28 (dd,  $J = 16.0, 9.6$  Hz, 1H), 3.83 (s, 5H), 4.05 (brd, 0.65H), 4.38 (brd, 1H), 6.93-7.00 (m, 1.65H), 7.13-7.21 (m, 3.5H), 7.77 (brd, 1.65H). **7a** + **8a**:  $^{13}\text{C}$  NMR (100 MHz,  $\text{CDCl}_3$ ): 9.1, 20.5, 21.8, 27.3, 32.90, 32.97, 43.0, 52.4, 60.6, 63.4, 115.2, 115.3, 122.7, 122.8, 124.3, 124.8, 127.3, 127.7, 153.8.

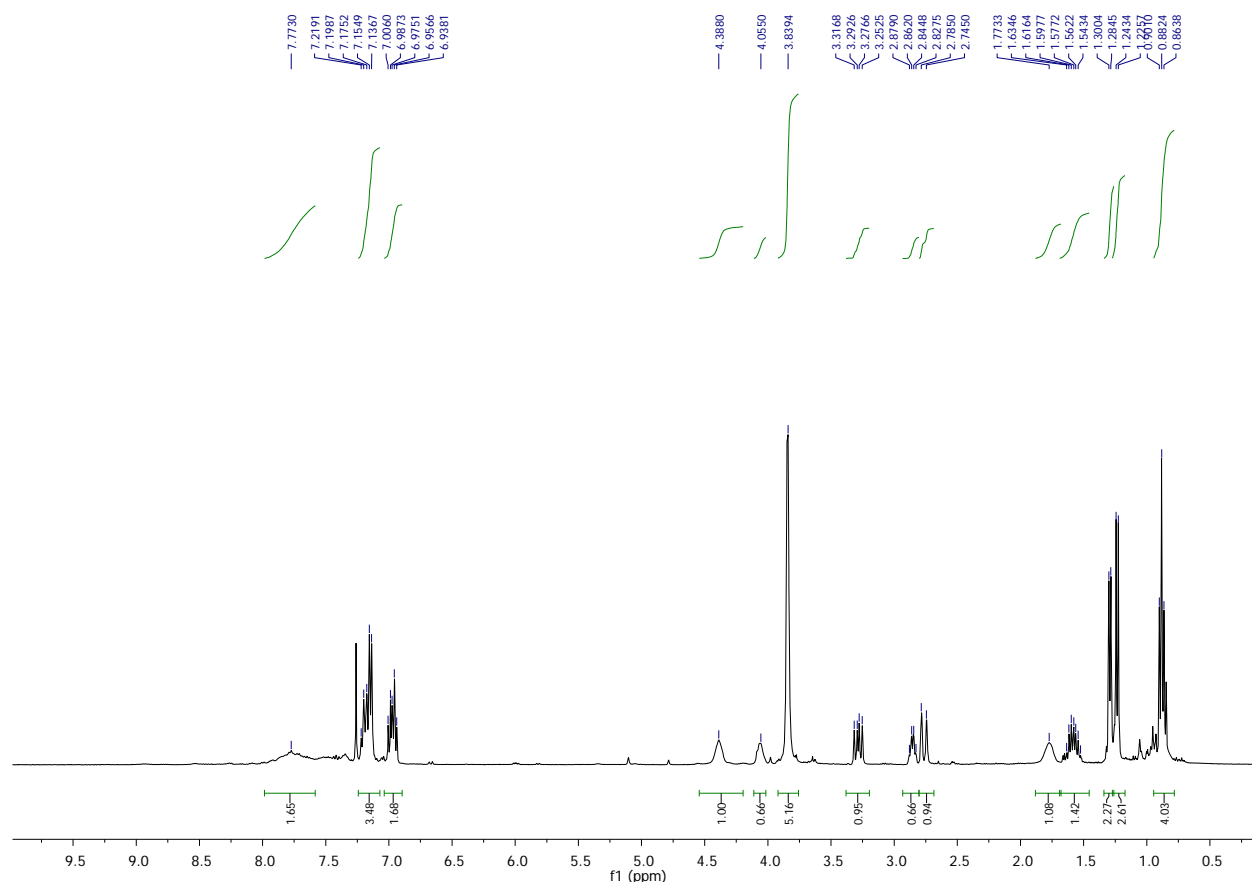

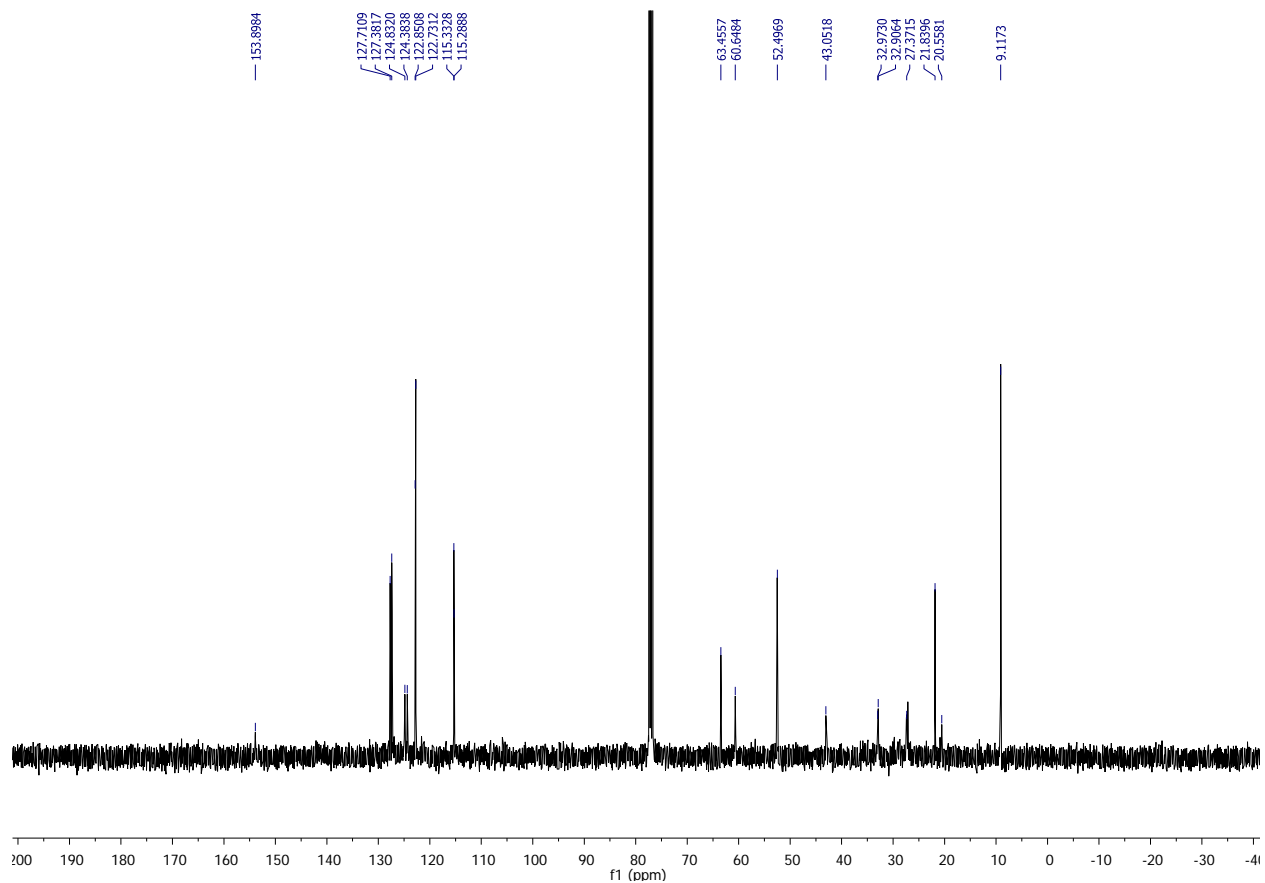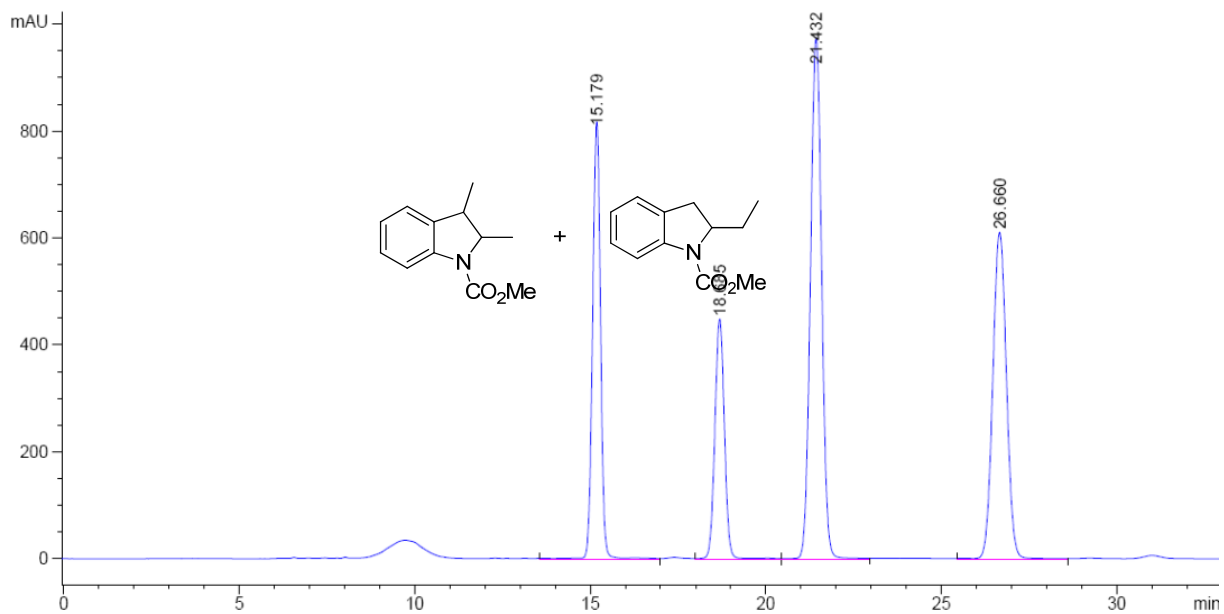

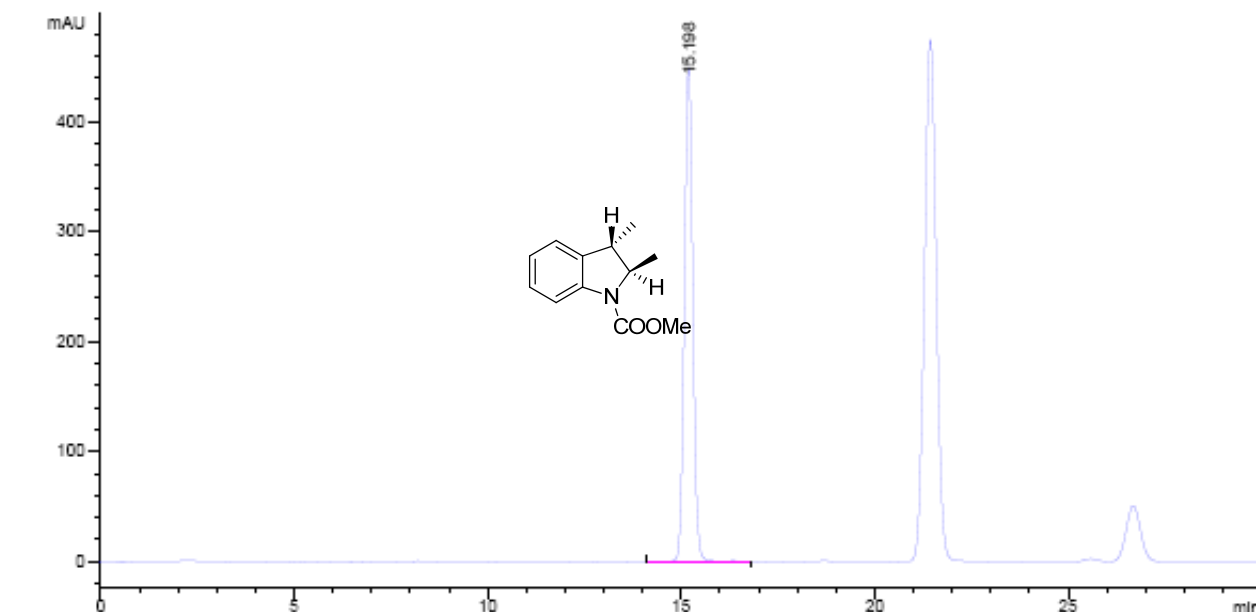

-----  
Area Percent Report  
-----

Sorted By : Signal  
Multiplier : 1.0000  
Dilution : 1.0000  
Use Multiplier & Dilution Factor with ISTDs

Signal 1: DAD1 A, Sig-254,4 Ref-off

| Peak # | RetTime [min] | Type | Width [min] | Area [mAU*s] | Height [mAU] | Area %   |
|--------|---------------|------|-------------|--------------|--------------|----------|
| 1      | 15.198        | VB   | 0.2786      | 6871.64307   | 438.97583    | 100.0000 |

Totals :                    6871.64307   438.97583

-----  
\*\*\* End of Report \*\*\*  
-----

**8a**: >99% *ee* [chiral column: AD-H, *n*-hexane/*i*-PrOH = 99 : 1, 0.5 mL/min, 254 nm;  $t_R$  = 15.19 min. (major)]

(*R*)-methyl 2-propylindoline-1-carboxylate **7b**; (*S,S*)-NHC<sup>HI</sup> (**3**) was used.

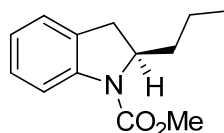

68% yield calcd. by NMR (29.7 mg). <sup>1</sup>H NMR (400 MHz, CDCl<sub>3</sub>): 0.90 (t, *J* = 7.6 Hz, 3H), 1.22-1.39 (m, 2H), 1.22-1.39 (m, 2H), 1.45-1.56 (m, 1H), 2.73 (dd, *J* = 16, 2 Hz, 1H), 3.27 (dd, *J* = 16, 9.6 Hz, 1H), 3.82 (s, 3H), 4.34-4.56 (brd, 1H), 6.94 (td, *J* = 7.6, 1.2 Hz, 1H), 7.12(d, *J* = 8 Hz, 1H), 7.16 (t, *J* = 7.6 Hz, 1H), 7.26-8.40 (brd, 1H). <sup>13</sup>C NMR (100 MHz):  $\delta$  =

14.2, 18.3, 33.6, 37.0, 52.6, 59.5, 115.5, 122.9, 125.0, 127.5, 130.6, 154.0. MS (ESI, 70 eV):  
 $m/z$  (%) = 220 (M+H)<sup>+</sup>; IR (neat):  $\nu$  = 751, 1022, 1059, 1135, 1193, 1221, 1239, 1270, 1290,  
1330, 1390, 1441, 1485, 1603, 1702, 2871, 2957 cm<sup>-1</sup>; ESI-HRMS calcd. for C<sub>13</sub>H<sub>18</sub>NO<sub>2</sub>  
220.1332, found 220.1320.

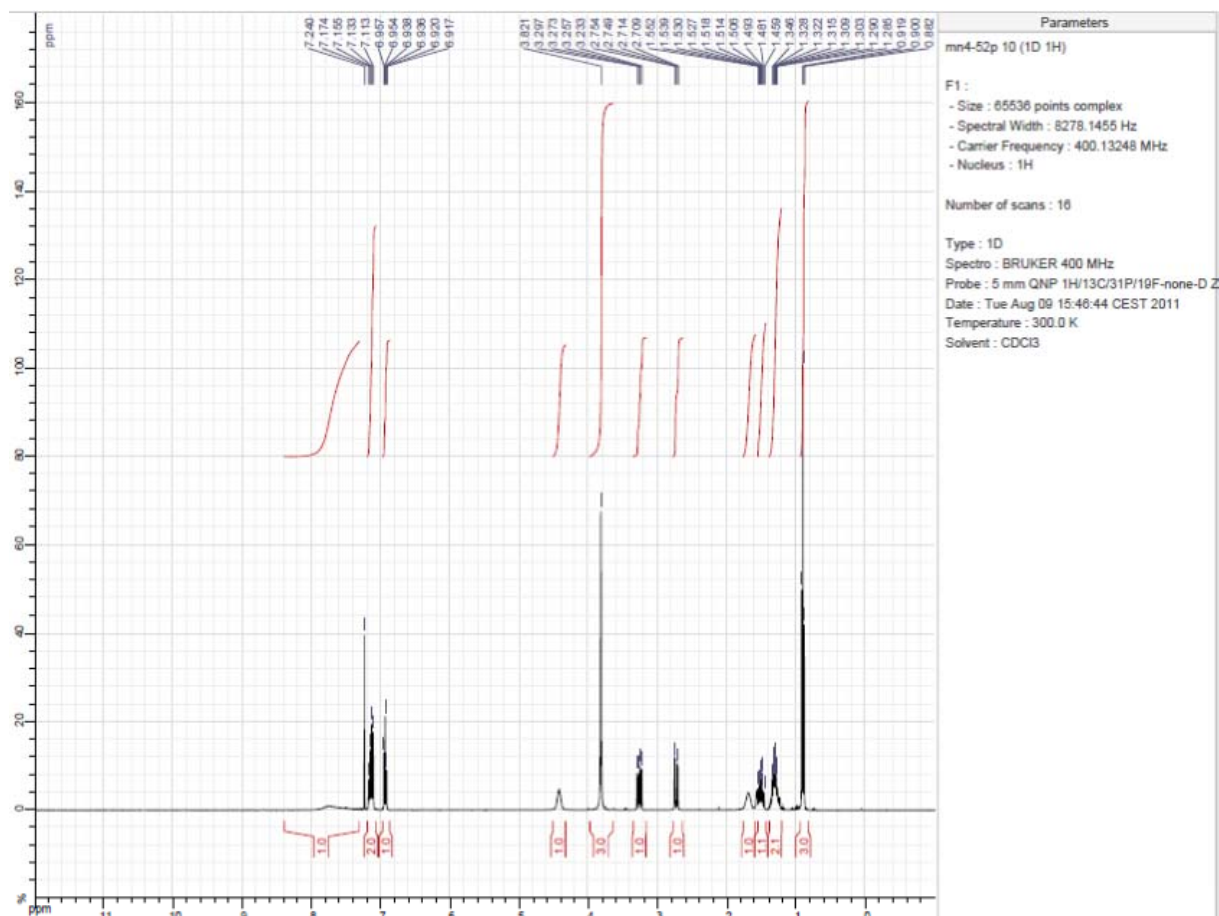

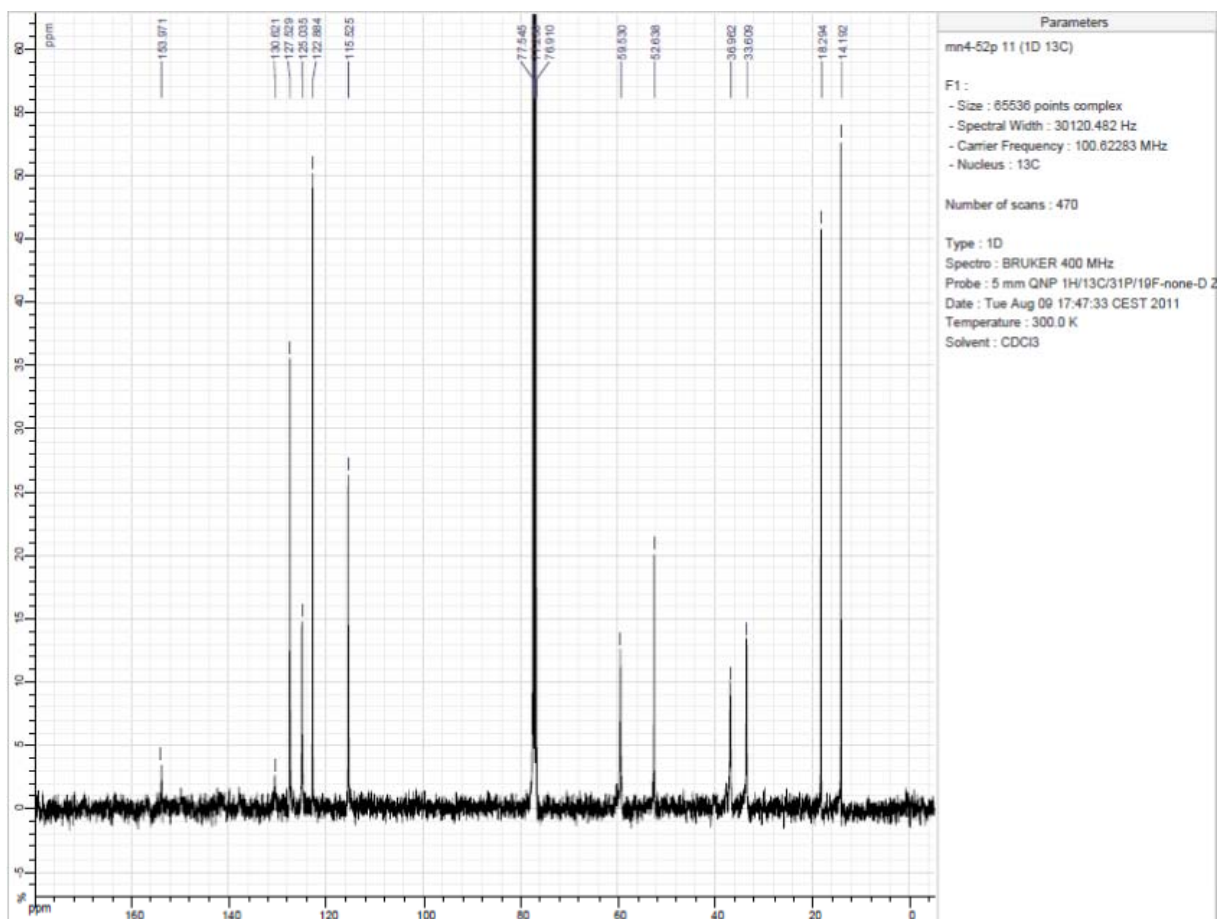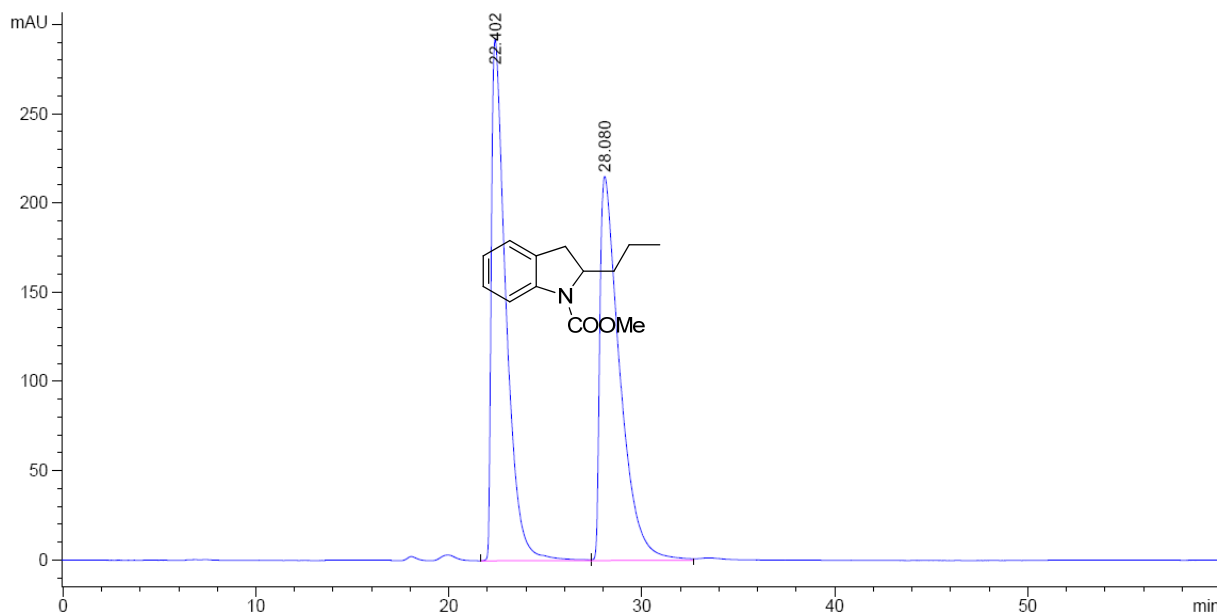



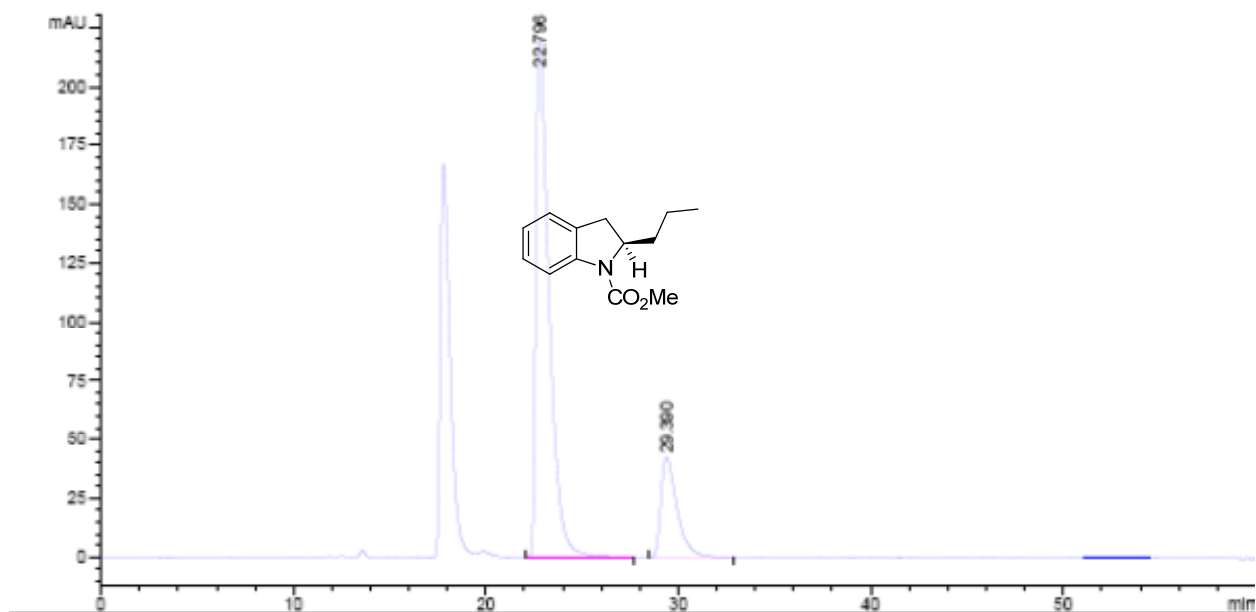

-----  
Area Percent Report  
-----

Sorted By : Signal  
Multiplier : 1.0000  
Dilution : 1.0000  
Use Multiplier & Dilution Factor with ISTDs

Signal 1: DAD1 A, Sig-254,4 Ref-Off

| Peak # | RetTime [min] | Type | Width [min] | Area [mAU*s] | Height [mAU] | Area %  |
|--------|---------------|------|-------------|--------------|--------------|---------|
| 1      | 22.796        | BB   | 0.7140      | 1.05878e4    | 219.79529    | 80.6193 |
| 2      | 29.390        | BB   | 0.8937      | 2545.28711   | 42.56399     | 19.3807 |

Totals : 1.31331e4 262.35928

-----  
\*\*\* End of Report \*\*\*  
-----

61% *ee* [chiral column: AS-H, *n*-hexane/*i*-PrOH = 100 : 0, 0.5 mL/min, 254 nm;  $t_R$  = 22.79 min. (major) and 29.39 (minor)].

(*R*)-methyl 2-propylindoline-1-carboxylate **7b** and (*2R,3S*)-methyl 3-ethyl-2-methylindoline-1-carboxylate **8b**; (*S,S*)-NHC·HI (**3**) was used.

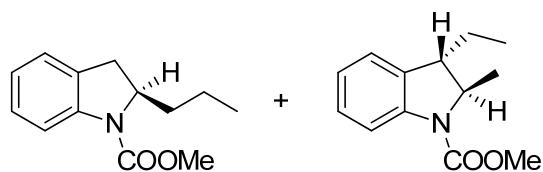

Colorless oil **8b**: 22% yield calcd. by NMR (9.6 mg), **7b** + **8b**:  $^1\text{H}$  NMR (400 MHz,  $\text{CDCl}_3$ ):  $\delta$  0.90-0.95 (m, 4.7H), 1.27-1.36 (m, 4H), 1.48-1.59 (m, 2H), 1.72 (brd, 1.4H), 2.67 (t,  $J$  = 6.4

Hz, 0.5H), 2.74 (dd,  $J = 16.0, 1.8$  Hz, 1H), 3.28 (dd,  $J = 16.0, 9.6$  Hz, 1H), 3.84 (s, 4.5H), 4.18 (brd, 0.5H), 4.44 (brd, 1H), 6.93-7.00 (m, 1.5H), 7.13-7.22 (m, 3H), 7.65 (brd, 1.5H). **7b** + **8b**:  $^{13}\text{C}$  NMR (100 MHz,  $\text{CDCl}_3$ ): 11.1, 14.0, 18.1, 29.0, 33.4, 36.7, 49.9, 52.4, 59.3, 61.0, 115.3, 122.6, 122.7, 124.8, 127.3, 127.7, 153.5, 153.7.

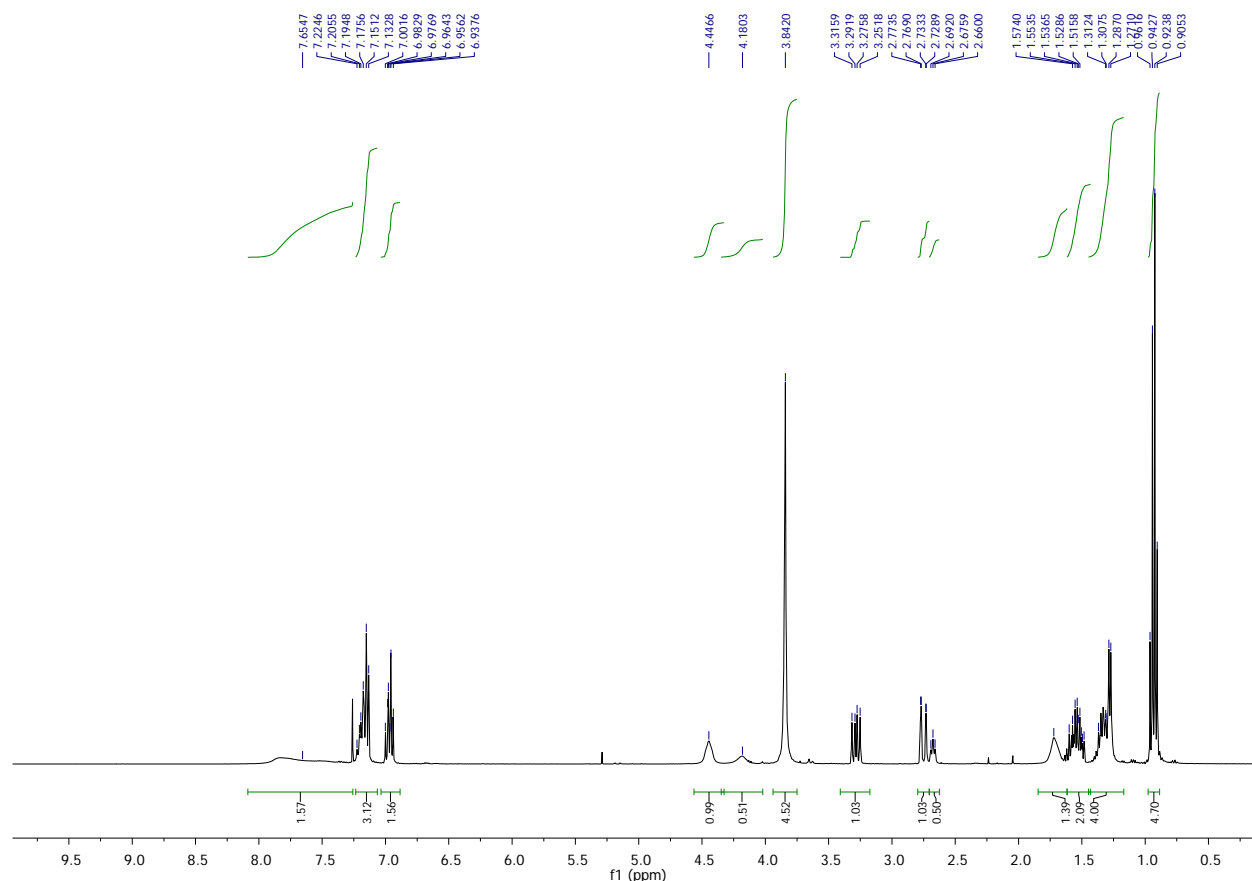

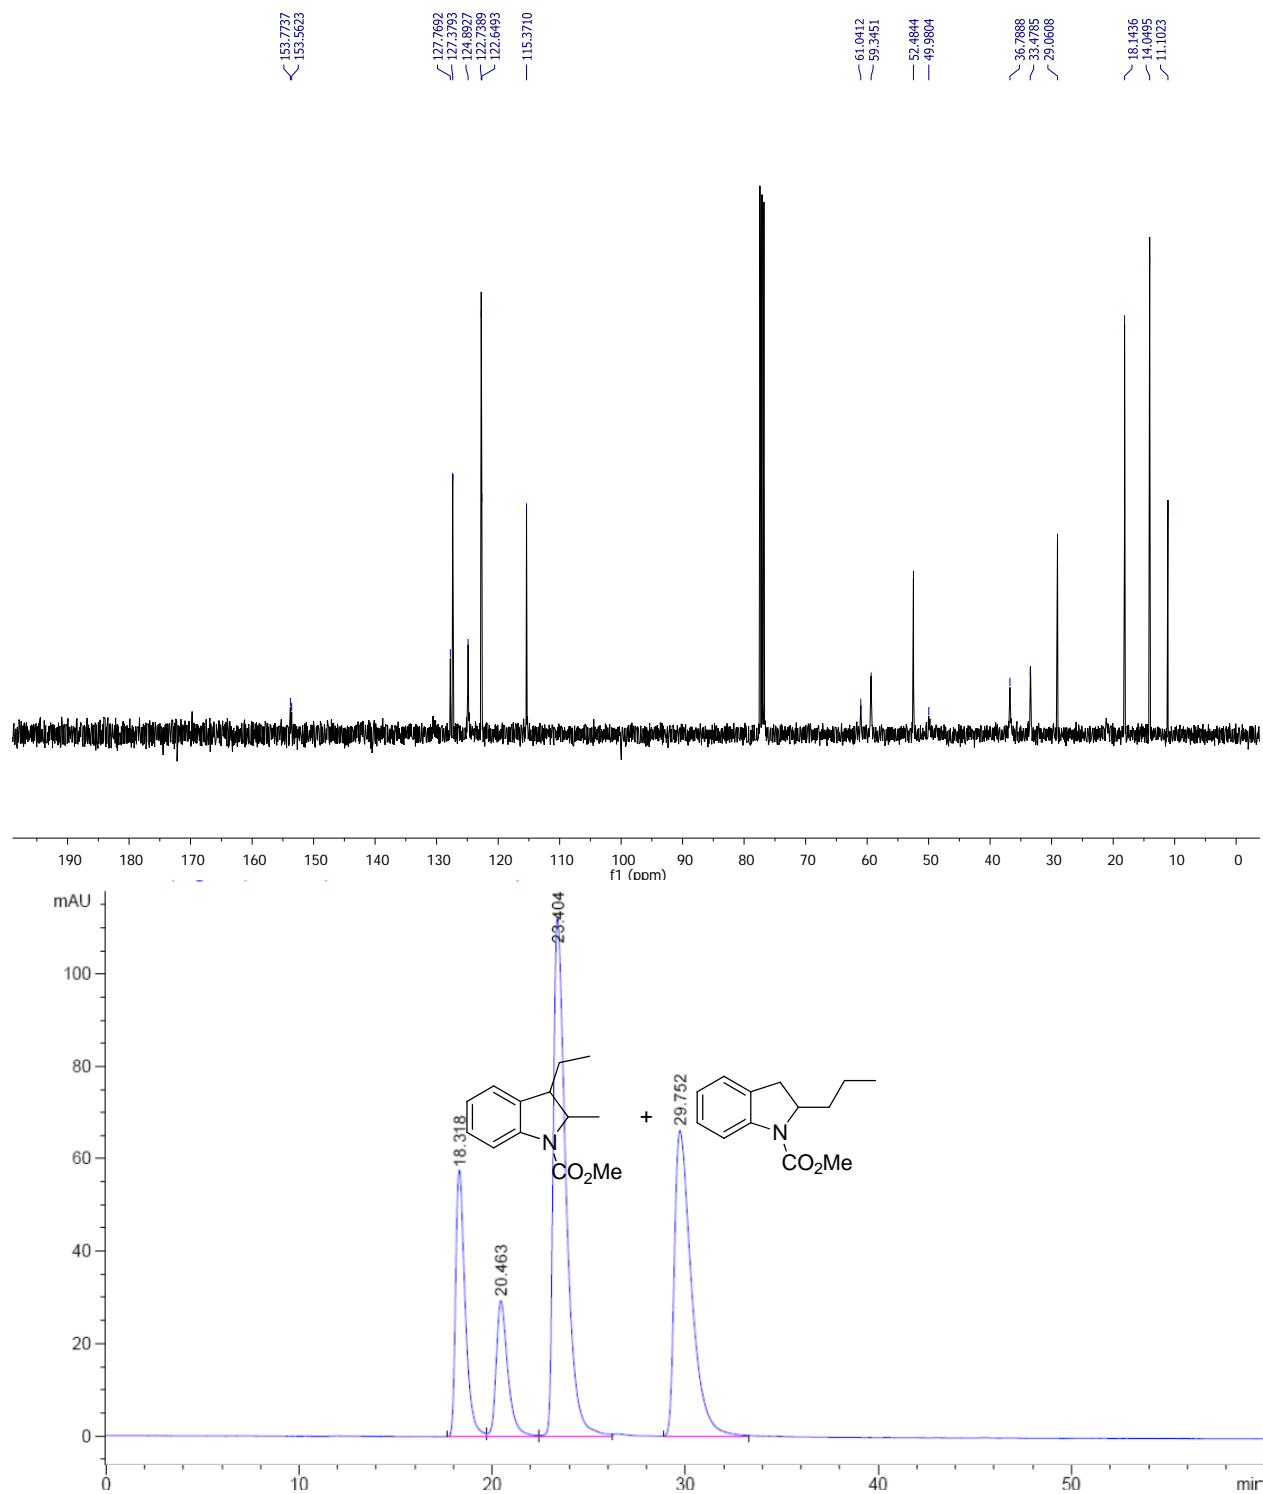

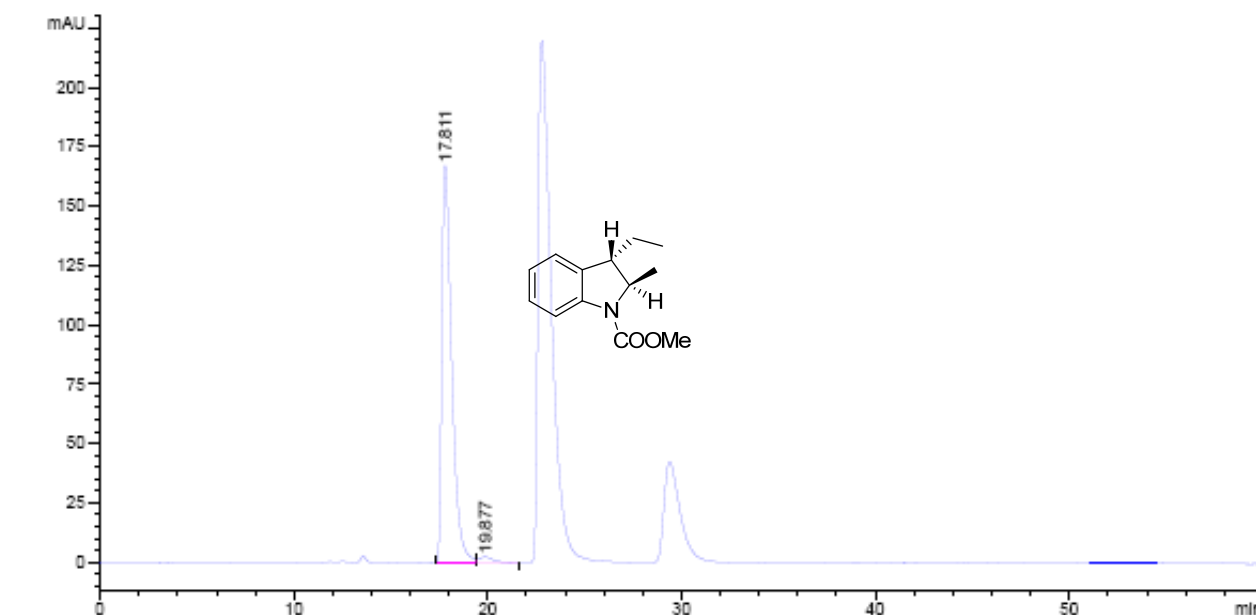

-----  
Area Percent Report  
-----

Sorted By : Signal  
Multiplier : 1.0000  
Dilution : 1.0000  
Use Multiplier & Dilution Factor with ISTDs

Signal 1: DAD1 A, Sig-254,4 Ref-off

| Peak # | RetTime [min] | Type | Width [min] | Area [mAU*s] | Height [mAU] | Area %  |
|--------|---------------|------|-------------|--------------|--------------|---------|
| 1      | 17.811        | BV   | 0.5397      | 5897.92506   | 167.12987    | 97.7527 |
| 2      | 19.877        | VB   | 0.7546      | 135.59413    | 2.49281      | 2.2473  |

Totals : 6033.52919 169.62268

-----  
\*\*\* End of Report \*\*\*  
-----

**8b**: 96% *ee* [chiral column: AS-H, *n*-hexane/*i*-PrOH = 100 : 0, 0.5 mL/min, 254 nm;  $t_R$  = 17.81 min. (major) and 19.87 (minor)].

(*R*)-methyl 2-phenethylindoline-1-carboxylate **7c**; (*S,S*)-NHC<sup>+</sup>HI (**4**) was used.

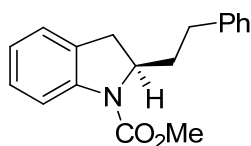

Colorless oil, 62% yield (34.8 mg), <sup>1</sup>H NMR (400 MHz, CDCl<sub>3</sub>): 1.80-1.96 (m, 1H), 2.00-2.18 (m, 1H), 2.52-2.72 (m, 2H), 2.82 (dd, *J* = 16, 2 Hz, 1H), 3.32 (dd, *J* = 16, 9.6 Hz, 1H), 3.81 (s, 3H), 4.34-4.60 (brd, 1H), 6.96 (t, *J* = 7.2, 0.8 Hz, 1H), 7.10-7.22 (m, 5H), 7.26-7.30

(m, 2H), 7.40-8.10 (brd, 1H).  $^{13}\text{C}$  NMR (125 MHz):  $\delta = 15.5, 31.3, 33.6, 36.2, 52.7, 59.3, 66.0, 115.6, 123.0, 125.1, 126.1, 127.6, 128.5, 130.3, 141.5, 142.1, 153.9$ . MS (ESI, 70 eV):  $m/z$  (%) = 282 ( $\text{M}+\text{H}$ ) $^+$ ; IR (neat):  $\nu = 749, 840, 942, 1056, 1130, 1191, 1225, 1289, 1330, 1389, 1440, 1484, 1602, 1701, 2858, 2952, 3027\text{ cm}^{-1}$ ; ESI-HRMS calcd. for  $\text{C}_{18}\text{H}_{20}\text{NO}_2$  282.1488, found 282.1480.

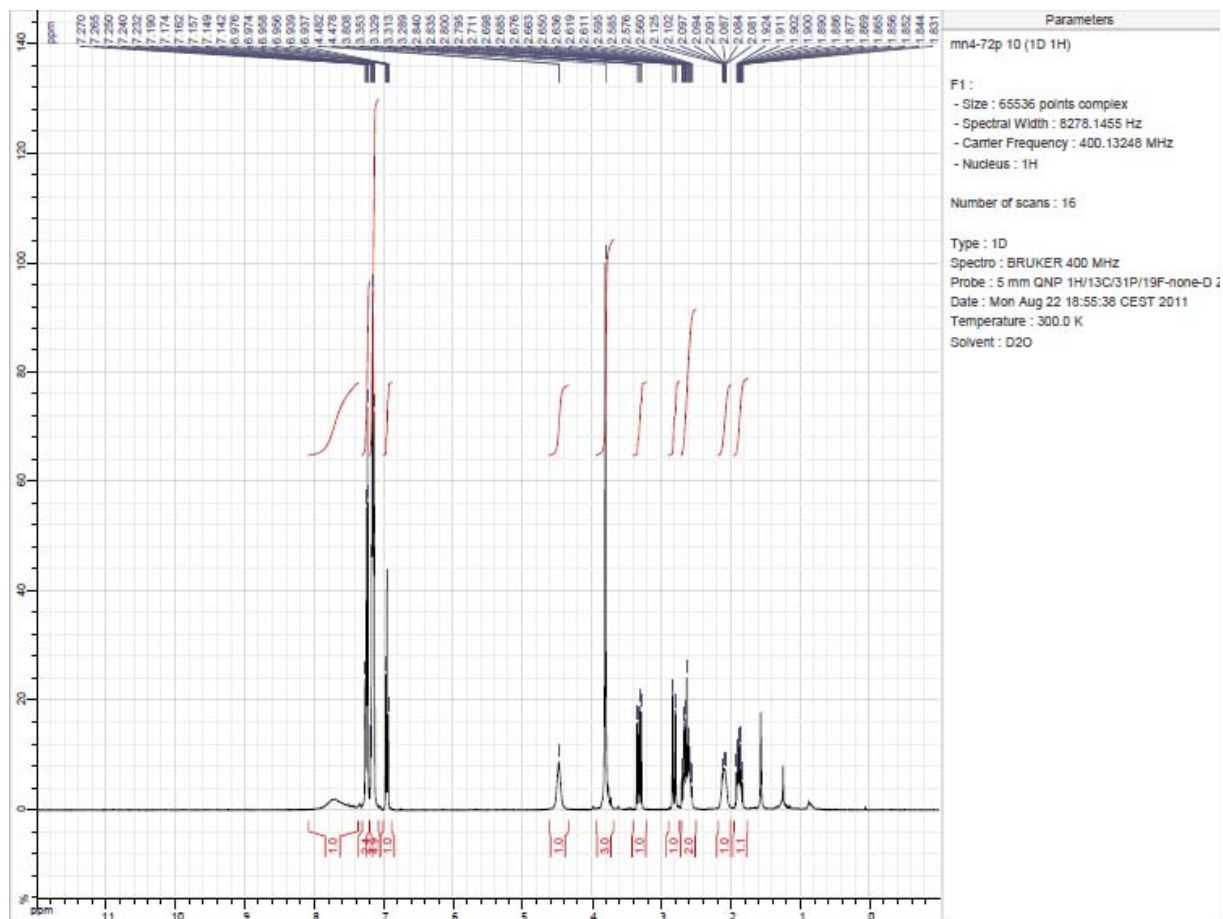

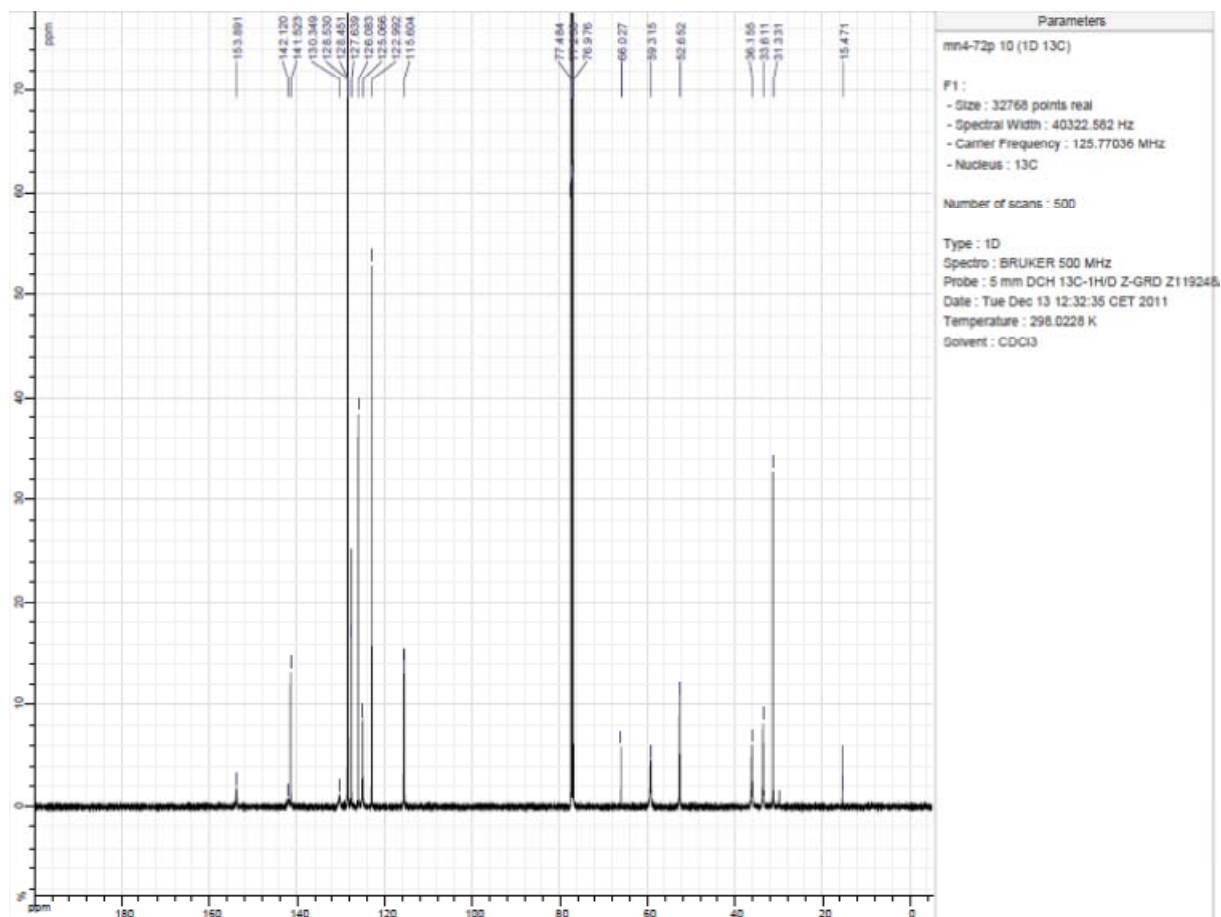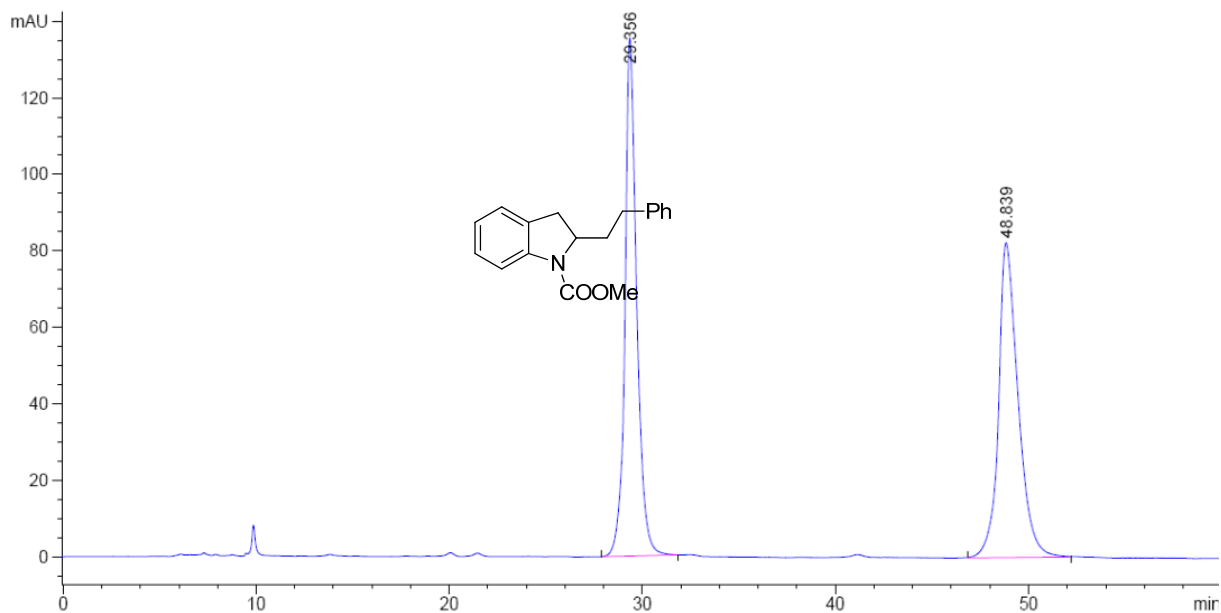

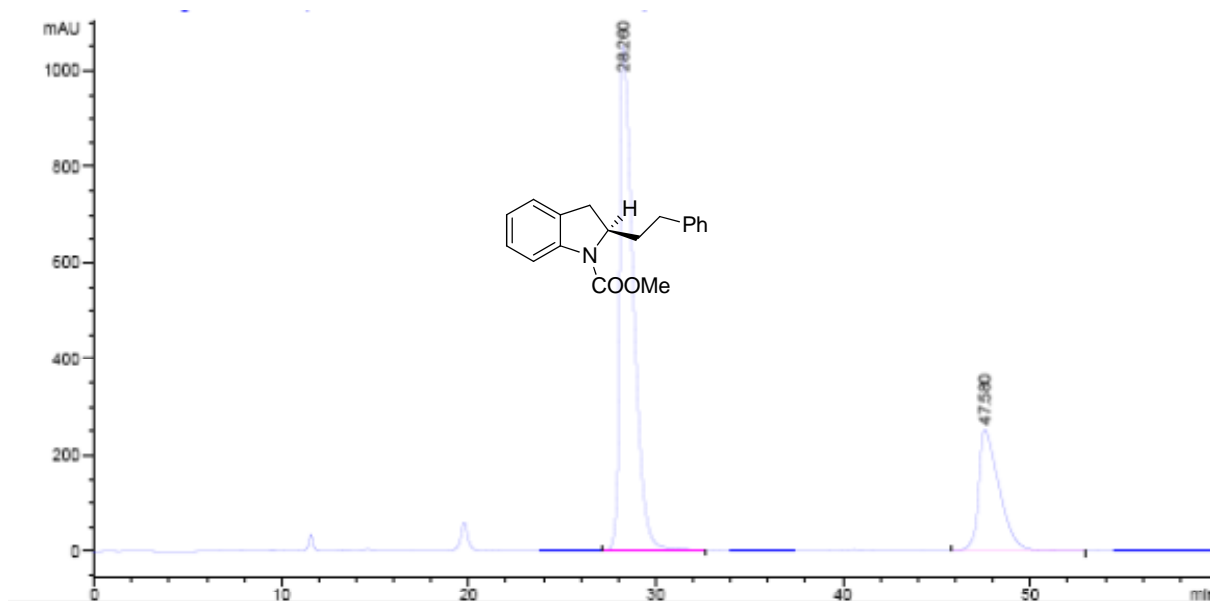

-----  
Area Percent Report  
-----

Sorted By : Signal  
Multiplier : 1.0000  
Dilution : 1.0000  
See Multiplier & Dilution Factor with ISTDs

Signal 1: DAD1 A, Sig-254,4 Ref-off

| Peak # | RetTime [min] | Type | Width [min] | Area [mAU*s] | Height [mAU] | Area %  |
|--------|---------------|------|-------------|--------------|--------------|---------|
| 1      | 28.260        | BV   | 0.7789      | 5.29535e4    | 1050.97388   | 73.5913 |
| 2      | 47.580        | BB   | 1.1546      | 1.93616e4    | 252.49791    | 26.4087 |

Totals : 7.33152e4 1303.47179

-----  
\*\*\* End of Report \*\*\*  
-----

$[\alpha]_D^{20} = -19.4$  ( $c = 1.0$  in  $\text{CH}_2\text{Cl}_2$ ), 47% *ee*, [chiral column: (*R,R*)-Whelk-O1, *n*-hexane/*i*-PrOH = 99 : 1, 0.5 mL/min, 254 nm;  $t_R = 28.26$  min. (major) and 47.58 min. (minor)].

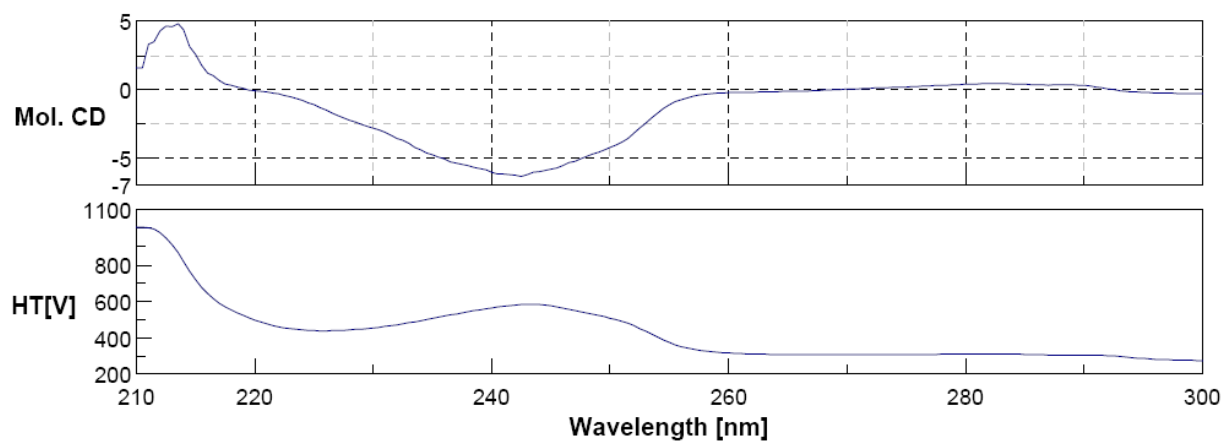

CD spectrum: 0.0001 M in *n*-hexane at 20 °C.

(2*R*,3*S*)-methyl 3-benzyl-2-methylindoline-1-carboxylate **8c**; (*S,S*)-NHC<sup>HI</sup> (**4**) was used.

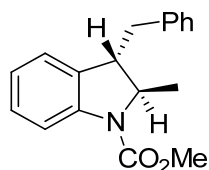

Colorless oil, 32% yield (17.9 mg), <sup>1</sup>H NMR (400 MHz, CDCl<sub>3</sub>): δ 1.12 (d, *J* = 6.4 Hz, 3H), 2.69-2.82 (m, 2H), 3.02 (t, *J* = 14.9 Hz, 1H), 3.78 (s, 3H), 4.18 (brd, 1H), 6.85-6.93 (m, 2H), 7.08 (d, *J* = 6.9 Hz, 2H), 7.13-7.27 (m, 4H), 7.59 (brd, 1H). <sup>13</sup>C NMR (100 MHz, CDCl<sub>3</sub>): 20.9, 42.4, 49.9, 52.6, 60.8, 115.6, 122.7, 125.3, 126.6, 128.2, 128.6, 129.4, 139.0. IR (neat, cm<sup>-1</sup>): 2947, 1701, 1601, 1482, 1439, 1387, 1280, 1190, 1059, 748, 698. EI-HRMS: calcd. for C<sub>18</sub>H<sub>20</sub>NO<sub>2</sub>: 282.1488, found: 282.1479.

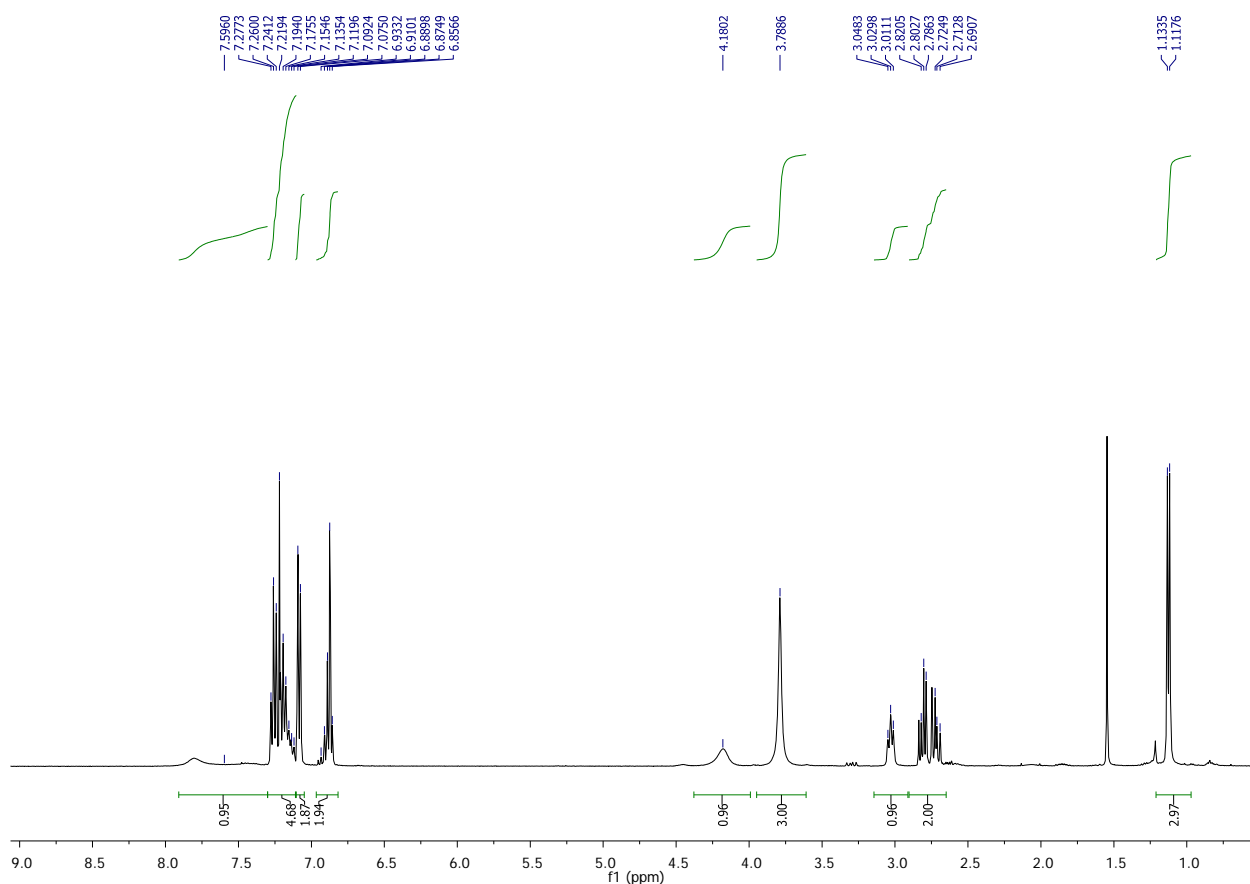



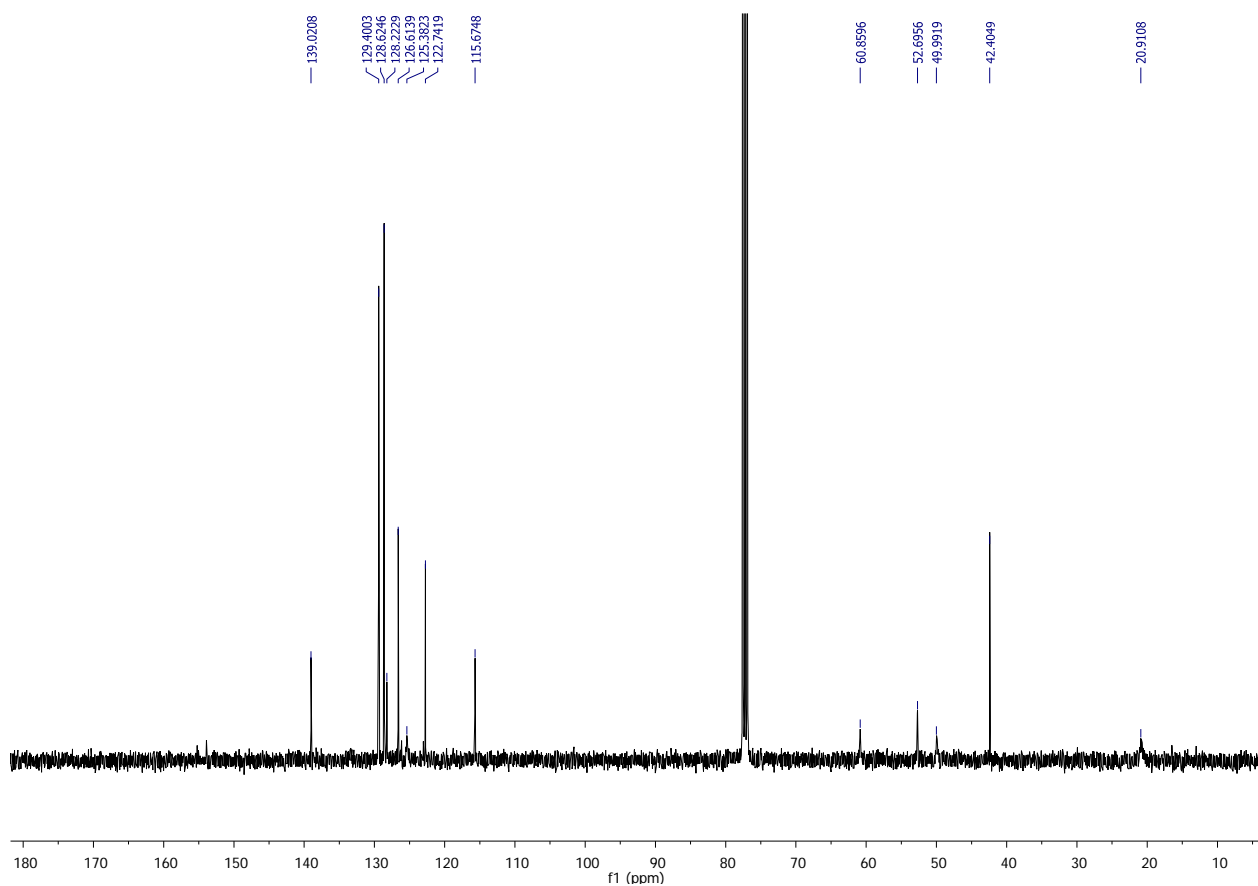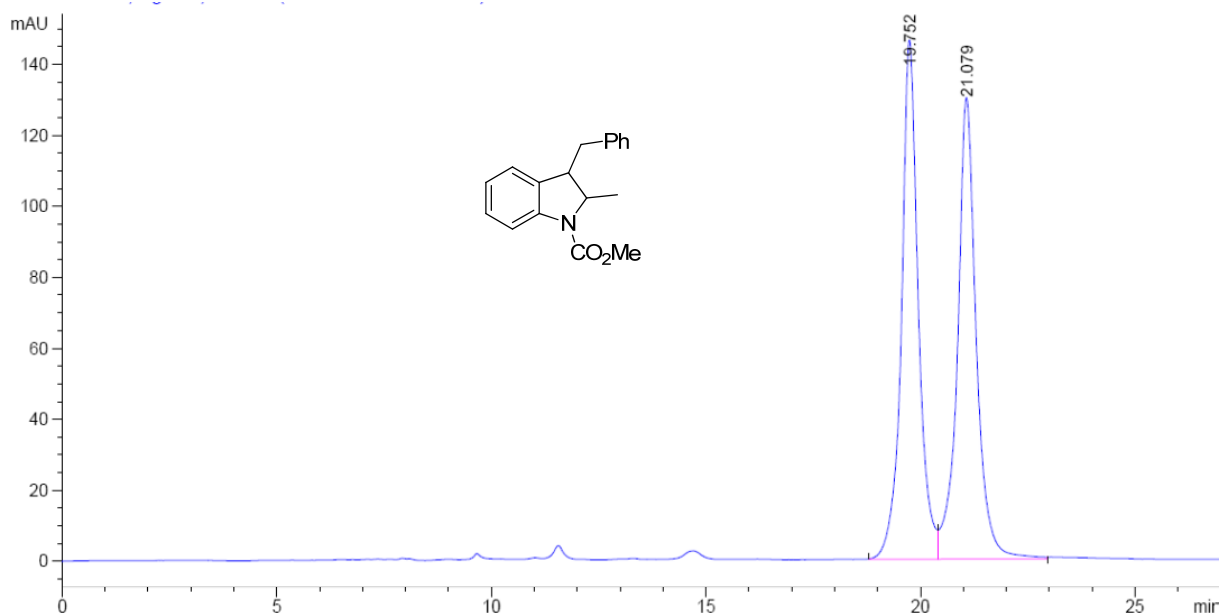

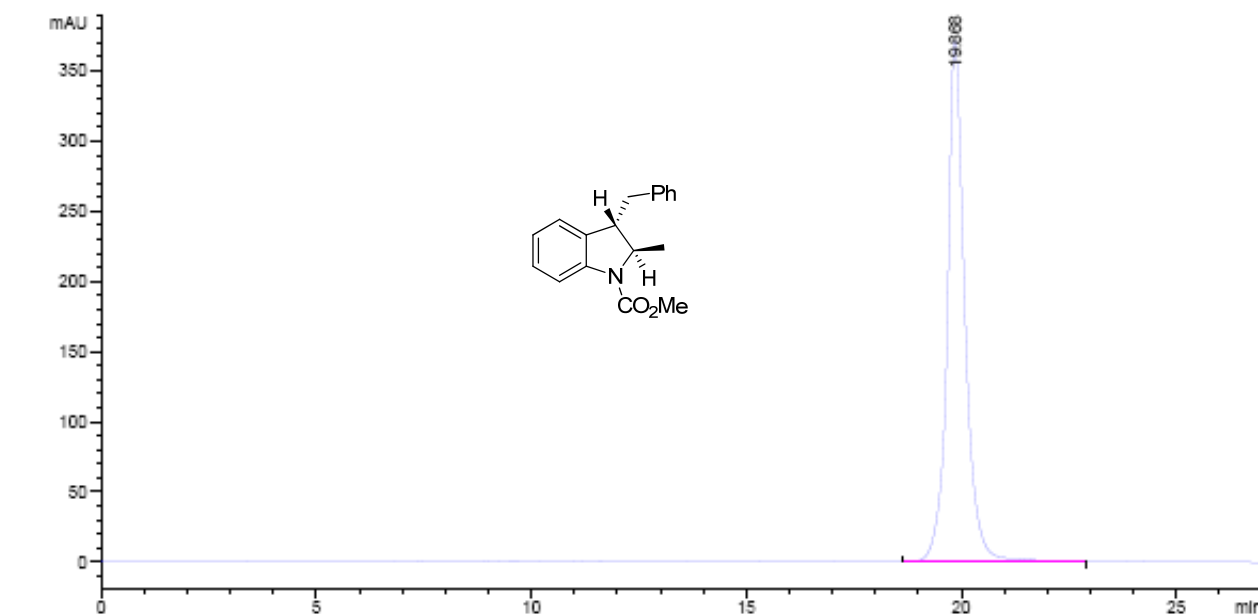

-----  
Area Percent Report  
-----

Sorted By : Signal  
Multiplier : 1.0000  
Dilution : 1.0000  
Use Multiplier & Dilution Factor with ISTDs

Signal 1: DAD1 A, Sig=254,4 Ref=off

| Peak #   | RetTime [min] | Type | Width [min] | Area [mAU*s] | Height [mAU] | Area %   |
|----------|---------------|------|-------------|--------------|--------------|----------|
| 1        | 19.868        | BB   | 0.4490      | 1.06690e4    | 369.40372    | 100.0000 |
| Totals : |               |      |             | 1.06690e4    | 369.40372    |          |

-----  
\*\*\* End of Report \*\*\*  
-----

$[\alpha]_D^{25} = +15.4$  ( $c = 0.5$  in  $\text{CH}_2\text{Cl}_2$ ),  $>99\%$   $ee$ , [chiral column: (*R,R*)-Whelk-O1, *n*-hexane/*i*-PrOH = 99 : 1, 0.5 mL/min, 254 nm;  $t_R = 19.86$  min. (major)].

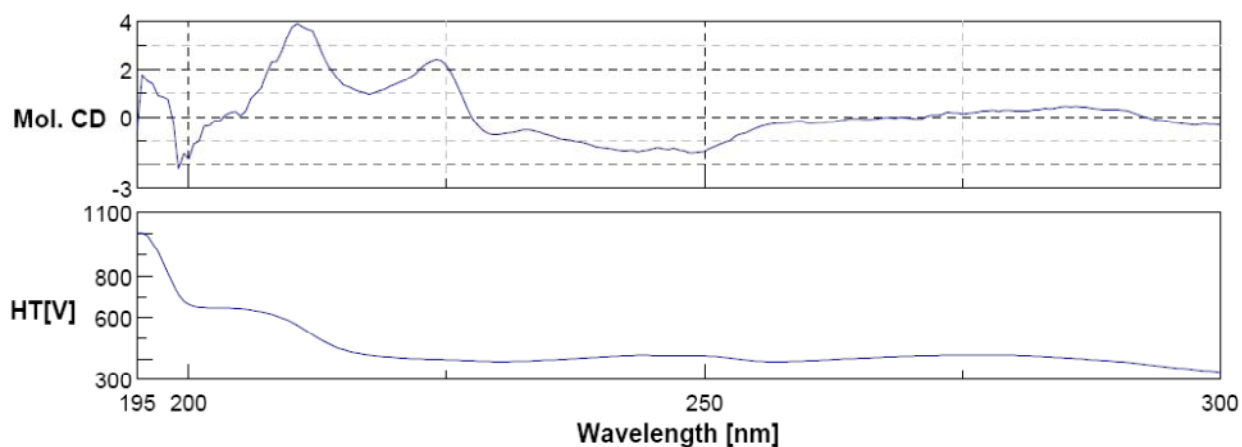

CD spectrum: 0.0001 M in *n*-hexane at 20 °C.

(*R*)-methyl 2-(3-((*tert*-butyldimethylsilyloxy)propyl)indoline-1-carboxylate **7d**; (*S,S*)-NHC·HI (**3**) was used.

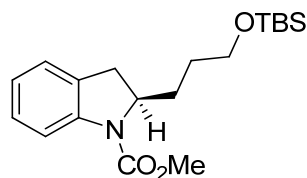

Colorless oil, 68% yield (47.4 mg), <sup>1</sup>H NMR (400 MHz, CDCl<sub>3</sub>): 0.00 (s, 3H), 0.01 (s, 3H), 0.86 (s, 9H), 1.41-1.67 (m, 3H), 1.70-1.84 (m, 1H), 2.75 (dd, *J* = 16, 2 Hz, 1H), 3.28 (dd, *J* = 16, 9.6 Hz, 1H), 3.58 (t, *J* = 6.4 Hz, 2H), 3.81 (s, 3H), 4.30-4.60 (brd, 1H), 6.94 (td, *J* = 7.2, 0.8 Hz, 1H), 7.12 (d, *J* = 7.2 Hz, 1H), 7.16 (t, *J* = 7.6 Hz, 1H), 7.40-8.20 (brd, 1H). <sup>13</sup>C NMR (125 MHz):  $\delta$  = 18.5, 26.1, 28.3, 31.2, 33.6, 52.6, 59.5, 63.1, 115.5, 122.9, 125.0, 127.6, 130.5, 154.0. MS (ESI, 70 eV): *m/z* (%) = 350 (M+H)<sup>+</sup>; IR (neat):  $\nu$  = 751, 833, 938, 1022, 1059, 1093, 1132, 1191, 1227, 1251, 1284, 1307, 1330, 1390, 1441, 1463, 1486, 1603, 1705, 2857, 2930, 2952 cm<sup>-1</sup>; EI-HRMS calcd. for C<sub>19</sub>H<sub>32</sub>NO<sub>3</sub>Si 350.2145, found 350.2150.

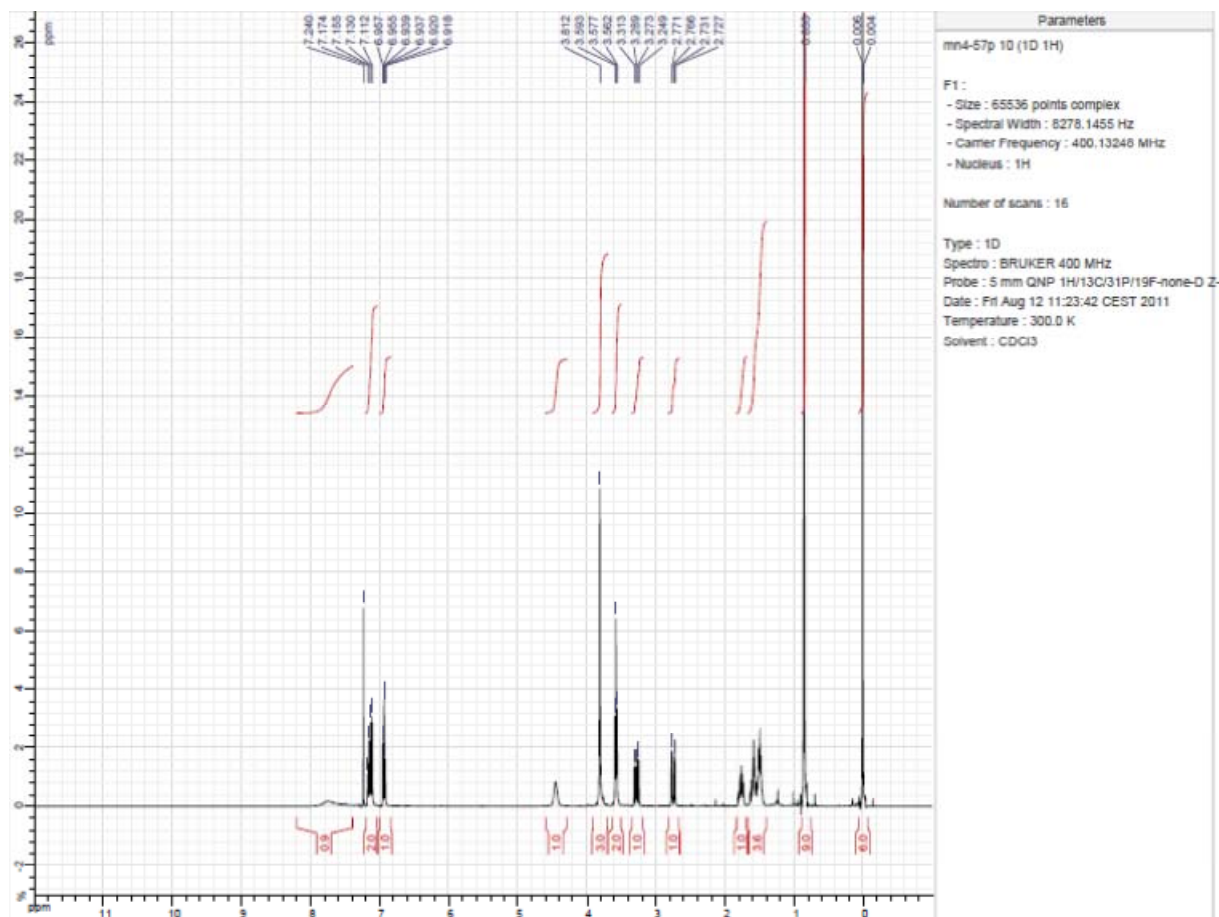

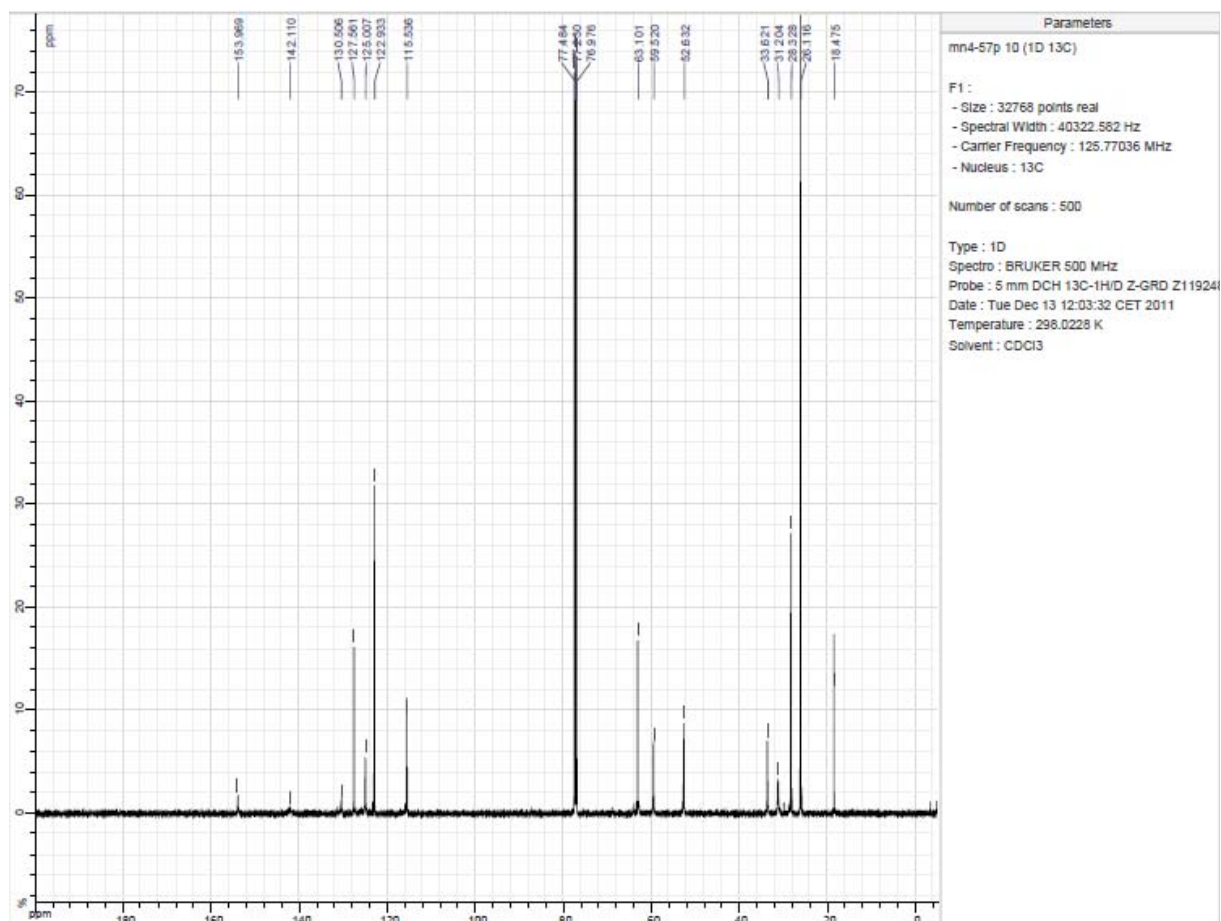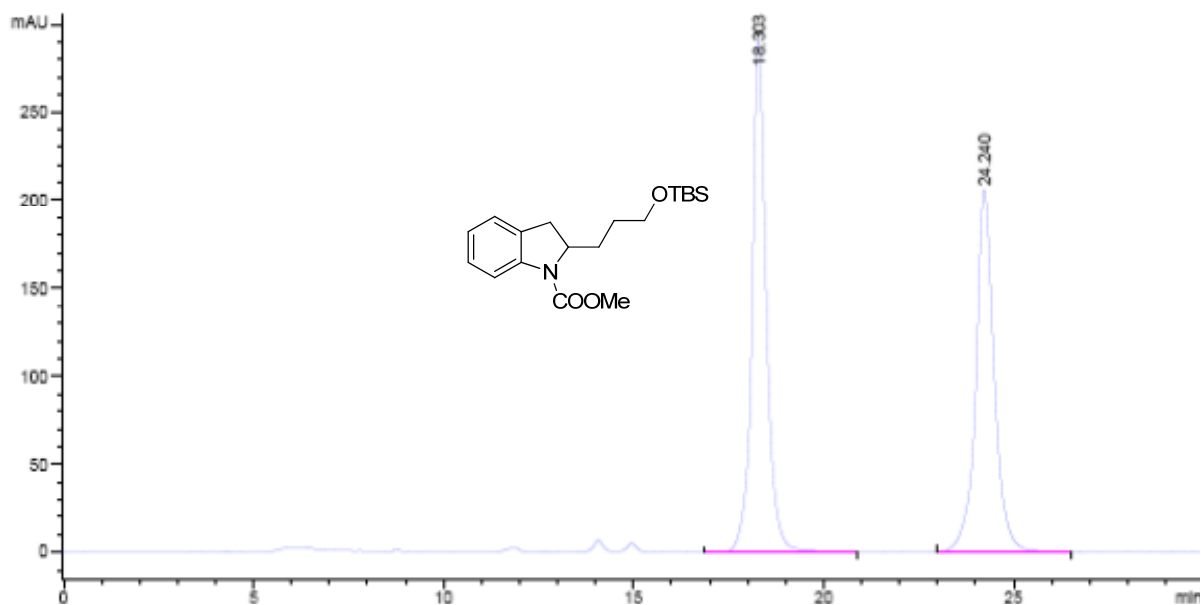

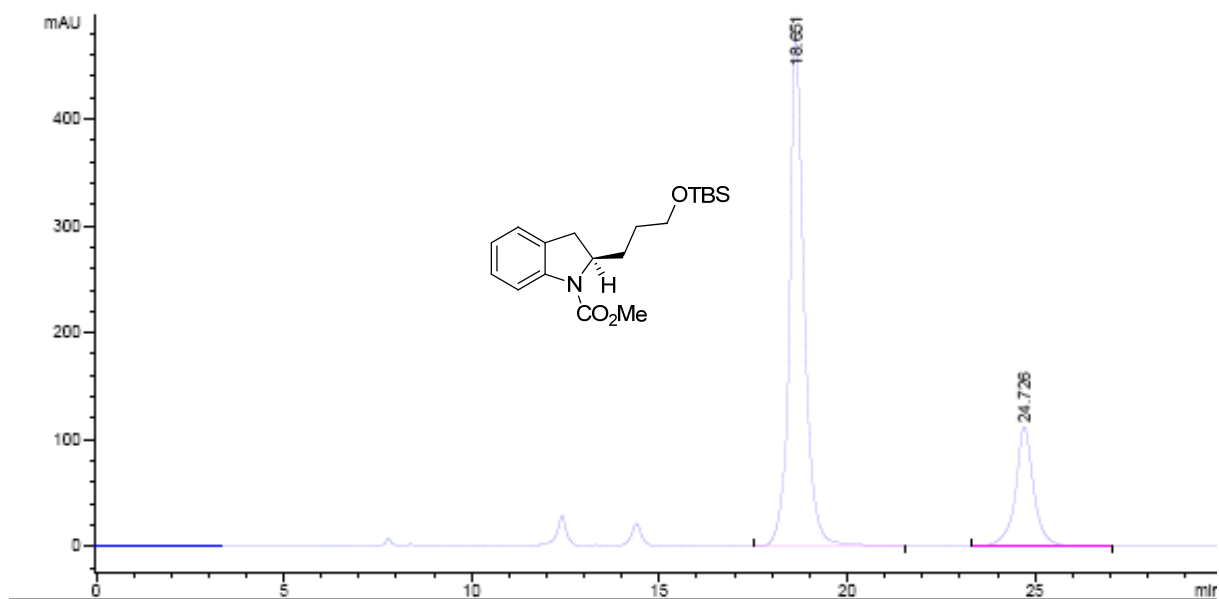

-----  
Area Percent Report  
-----

Sorted By : Signal  
Multiplier : 1.0000  
Dilution : 1.0000  
See Multiplier & Dilution Factor with ISTDs

Signal 1: DAD1 A, Sig-254,4 Ref-off

| Peak # | RetTime [min] | Type | Width [min] | Area [mAU*s] | Height [mAU] | Area %  |
|--------|---------------|------|-------------|--------------|--------------|---------|
| 1      | 18.651        | BB   | 0.4199      | 1.31376e4    | 473.17184    | 77.3458 |
| 2      | 24.726        | BB   | 0.5140      | 3847.94482   | 111.66259    | 22.6542 |

Totals : 1.69856e4 584.83443

-----  
\*\*\* End of Report \*\*\*

$[\alpha]_D^{25} = -18.8$  ( $c = 1.0$  in  $\text{CH}_2\text{Cl}_2$ ), 55% *ee*, [chiral column: (*R,R*)-Whelk-O1, *n*-hexane/*i*-PrOH = 99 : 1, 0.5 mL/min, 254 nm;  $t_R = 18.65$  min. (major) and 24.72 min. (minor)].

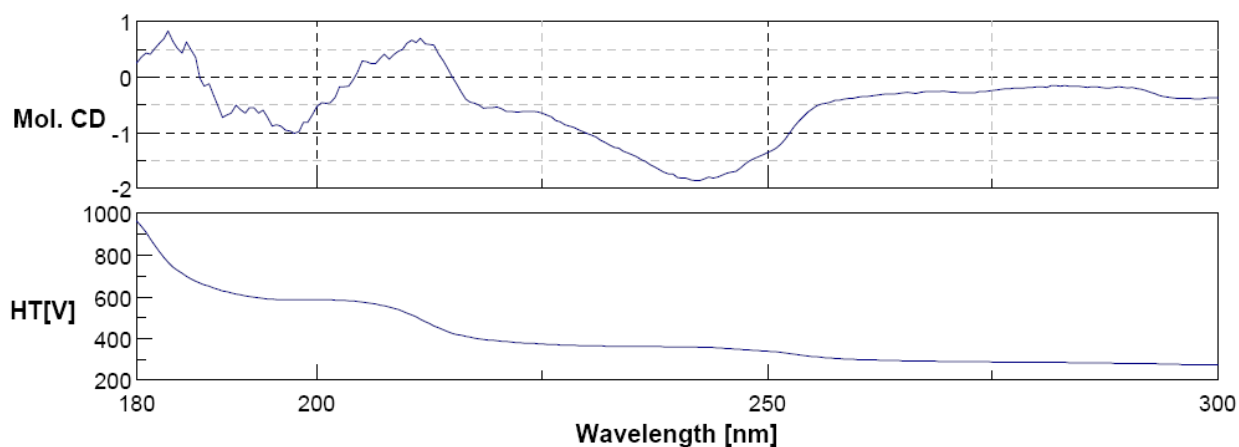

CD spectrum: 0.0001 M in *n*-hexane at 20 °C.

(2*R*,3*S*)-methyl 3-(2-((*tert*-butyldimethylsilyl)oxy)ethyl)-2-methylindoline-1-carboxylate **8d**;  
(*S,S*)-NHC<sup>•</sup>HI (**3**) was used.

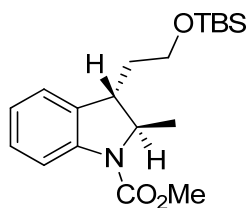

Colorless oil, 21% yield (14.6 mg), <sup>1</sup>H NMR (400 MHz, CDCl<sub>3</sub>): δ 0.06 (d, *J* = 3.4 Hz, 6H), 0.91 (s, 9H), 1.26 (d, *J* = 6.4 Hz, 3H), 1.69-1.74 (m, 2H), 2.96 (t, *J* = 6.7 Hz, 1H), 3.71 (d, *J* = 6.0 Hz, 2H), 3.83 (s, 3H), 4.26-4.30 (m, 1H), 6.97 (td, *J* = 7.4, 0.9 Hz, 1H), 7.15-7.21 (m, 2H), 7.61 (brd, 1H). <sup>13</sup>C NMR (100 MHz, CDCl<sub>3</sub>): 5.0, 1.2, 18.4, 20.6, 26.1, 39.0, 45.1, 52.6, 60.6, 61.3, 115.6, 122.8, 125.0, 127.9, 134.4. IR (neat, cm<sup>-1</sup>): 2926, 2854, 1705, 1602, 1485, 1440, 1389, 1250, 1094, 1054, 938, 832, 749. EI-HRMS: calcd. for C<sub>19</sub>H<sub>32</sub>NO<sub>3</sub>Si [M+H]<sup>+</sup>: 350.2145, found: 350.2137.

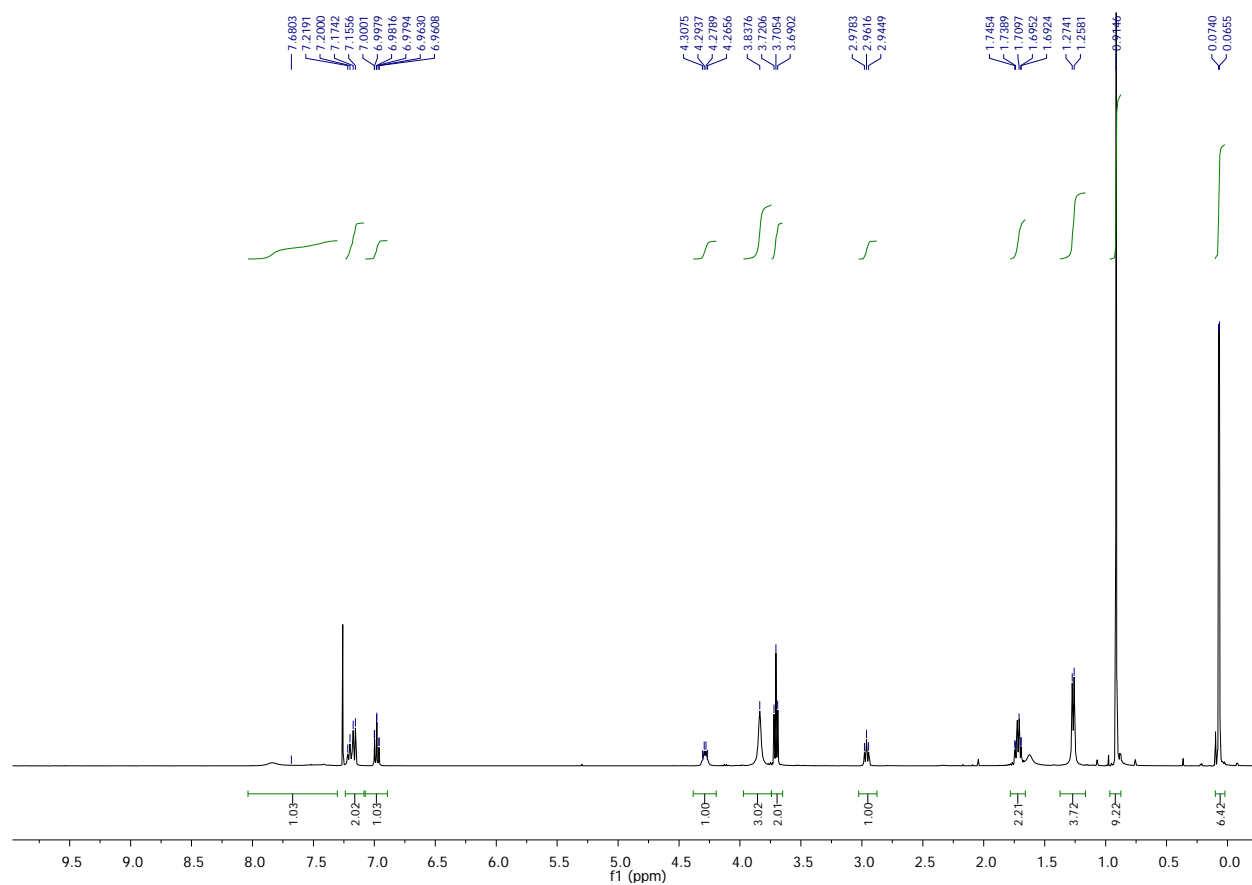

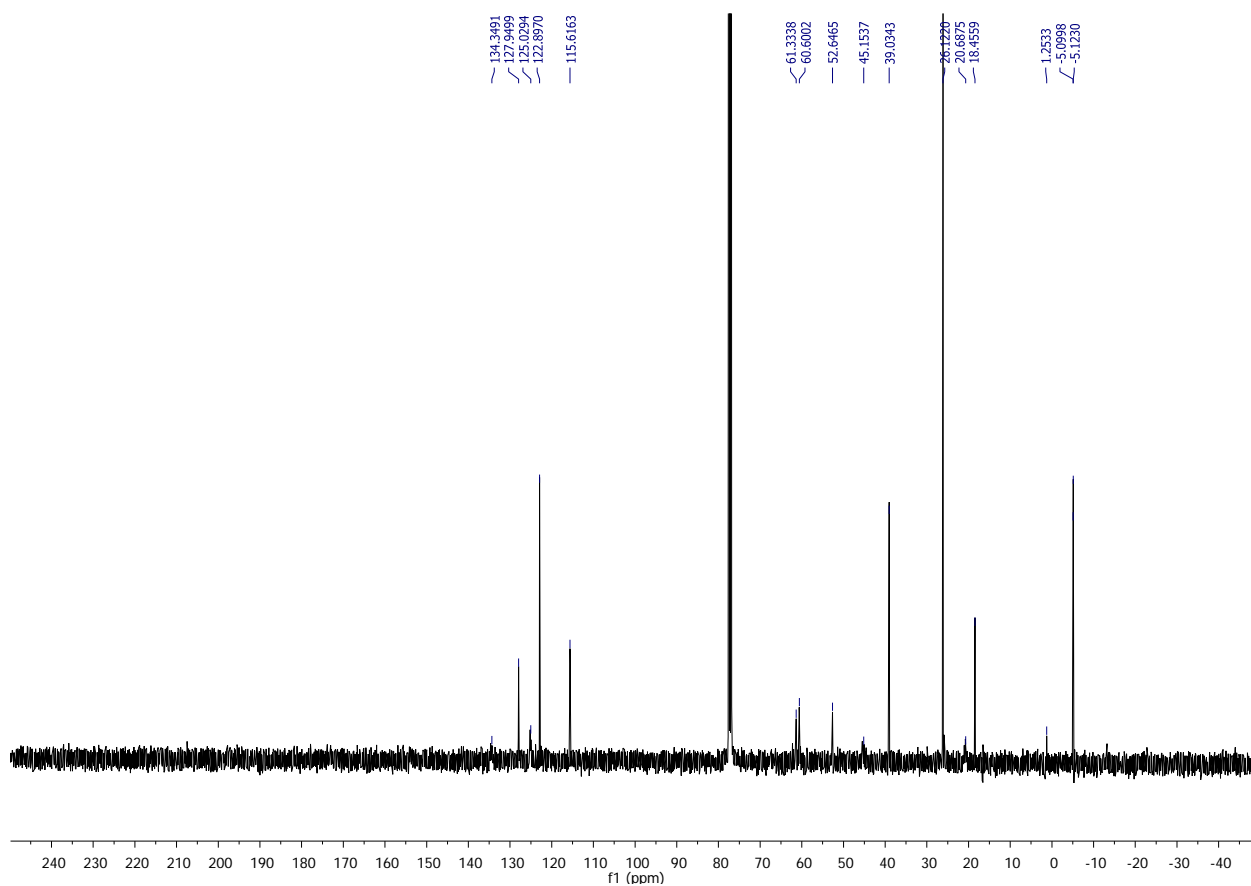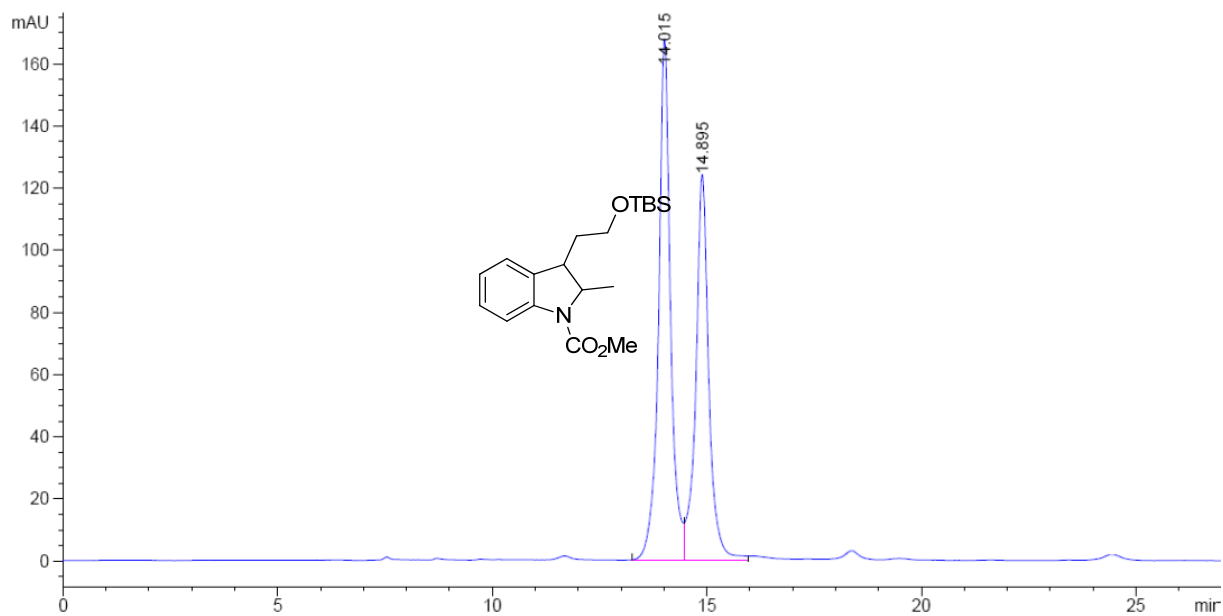

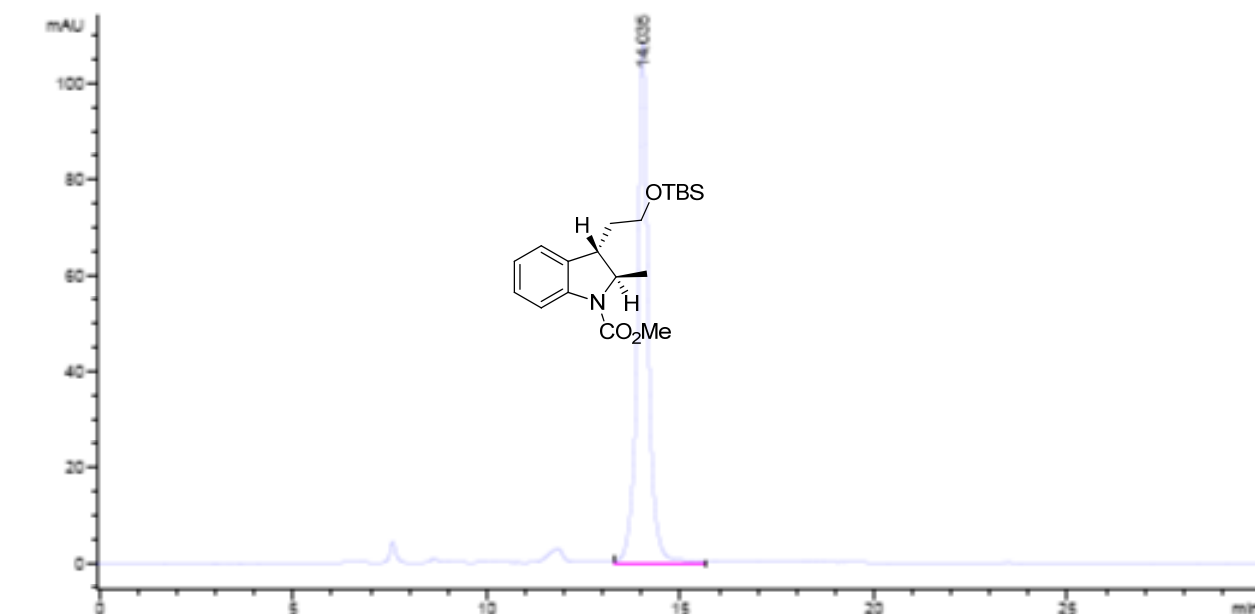

-----  
Area Percent Report  
-----

Sorted By : Signal  
Multiplier : 1.0000  
Dilution : 1.0000  
Use Multiplier & Dilution Factor with ISTDs

Signal 1: DAD1 A, Sig=254,4 Ref=off

| Peak # | RetTime [min] | Type | Width [min] | Area [mAU*s] | Height [mAU] | Area %   |
|--------|---------------|------|-------------|--------------|--------------|----------|
| 1      | 14.035        | BB   | 0.3152      | 2147.29150   | 106.52612    | 100.0000 |

Totals :                    2147.29150   106.52612

-----  
See End of Report See  
-----

$[\alpha]_D^{25} = +6.6$  ( $c = 0.5$  in CH<sub>2</sub>Cl<sub>2</sub>), >99% ee, [chiral column: (*R,R*)-Whelk-O1, *n*-hexane/*i*-PrOH = 99 : 1, 0.5 mL/min, 254 nm;  $t_R = 14.03$  min. (major)].

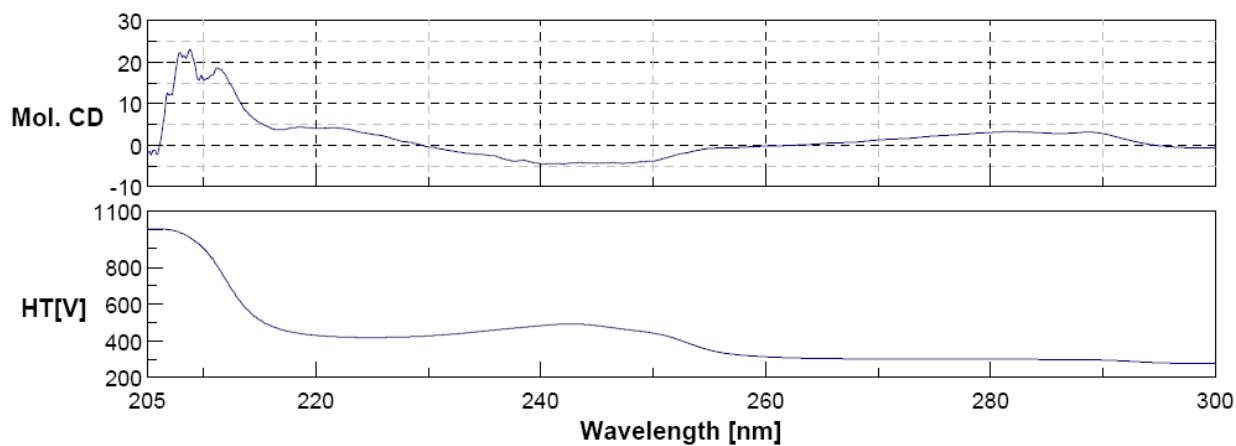

CD spectrum: 0.0001 M in *n*-hexane at 20 °C.





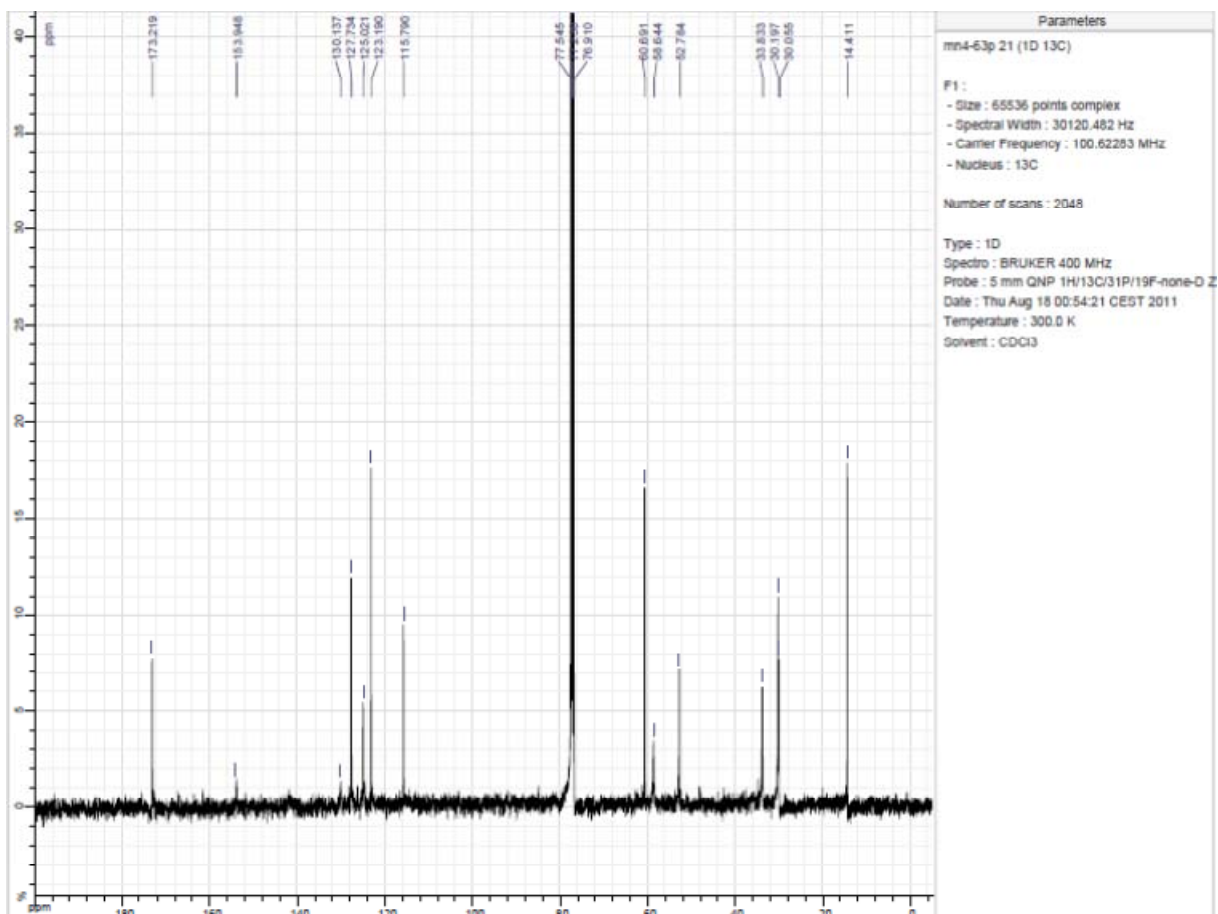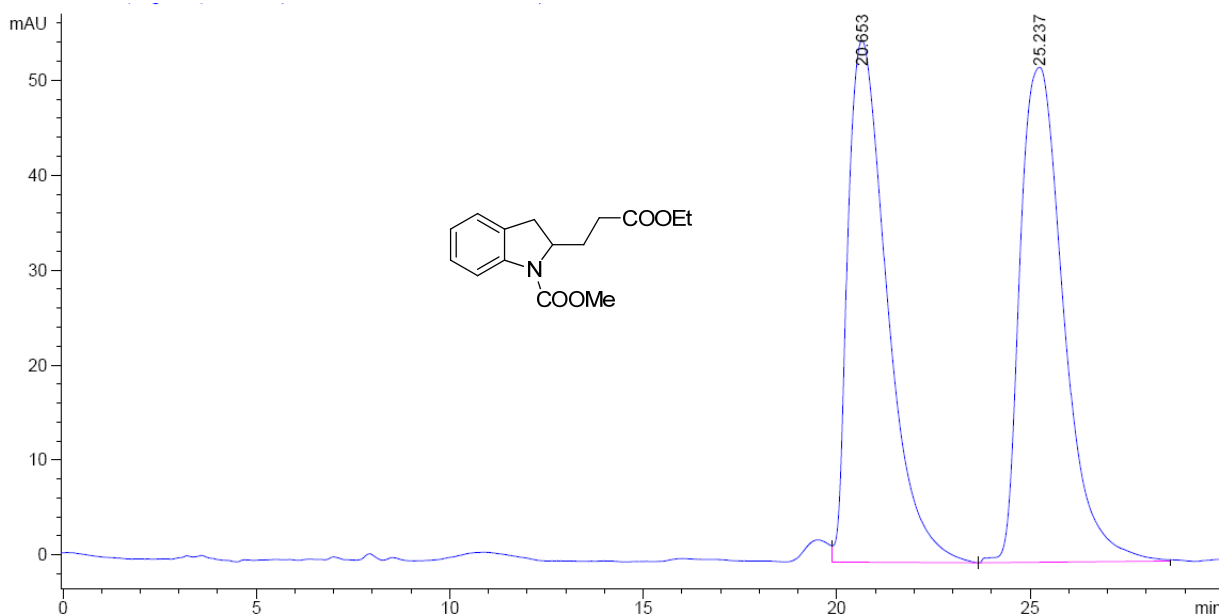

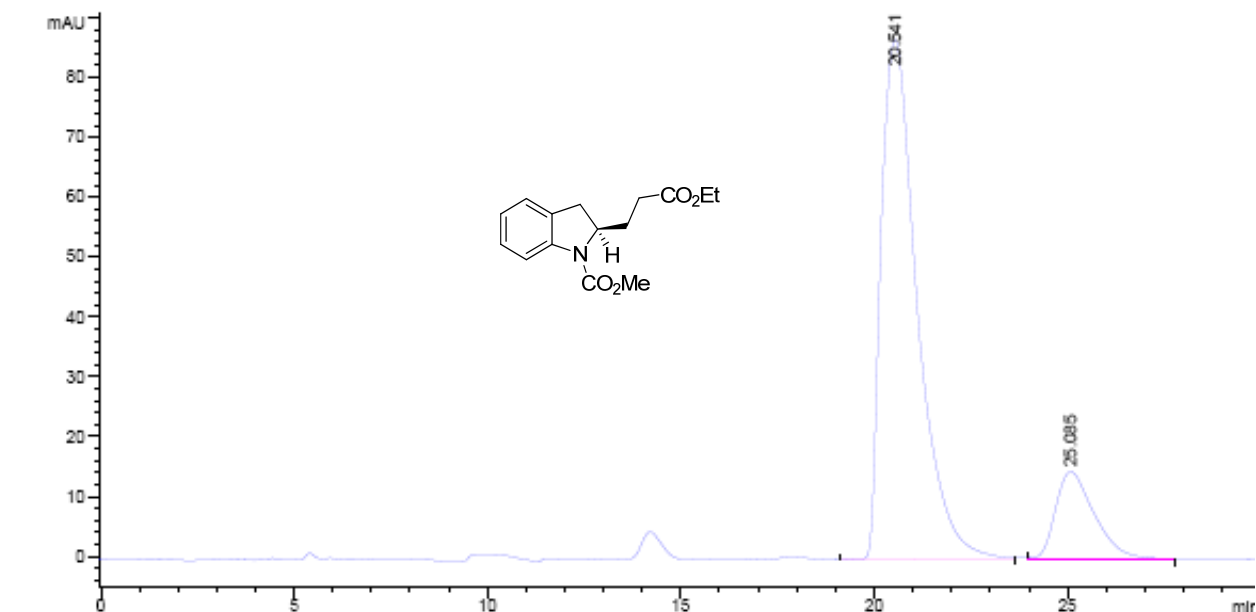

Area Percent Report

Sorted By : Signal  
Multiplier : 1.0000  
Dilution : 1.0000  
See Multiplier & Dilution Factor with ISTDs

Signal 1: DAD1 A, Sig-254,4 Ref-off

| Peak # | RetTime [min] | Type | Width [min] | Area [mAU*s] | Height [mAU] | Area %  |
|--------|---------------|------|-------------|--------------|--------------|---------|
| 1      | 20.541        | VB   | 1.0079      | 5656.80176   | 86.85279     | 84.5214 |
| 2      | 25.085        | BB   | 1.0424      | 1035.94446   | 14.69674     | 15.4786 |

Totals : 6692.74622 101.54953

\*\*\* End of Report \*\*\*

$[\alpha]_D^{20} = -31.78$  ( $c = 1.0$  in  $\text{CH}_2\text{Cl}_2$ ), 69% *ee*, [chiral column: OD-H, *n*-hexane/*i*-PrOH = 99 : 1, 0.5 mL/min, 254 nm;  $t_R = 20.54$  min. (major) and 25.08 (minor)].

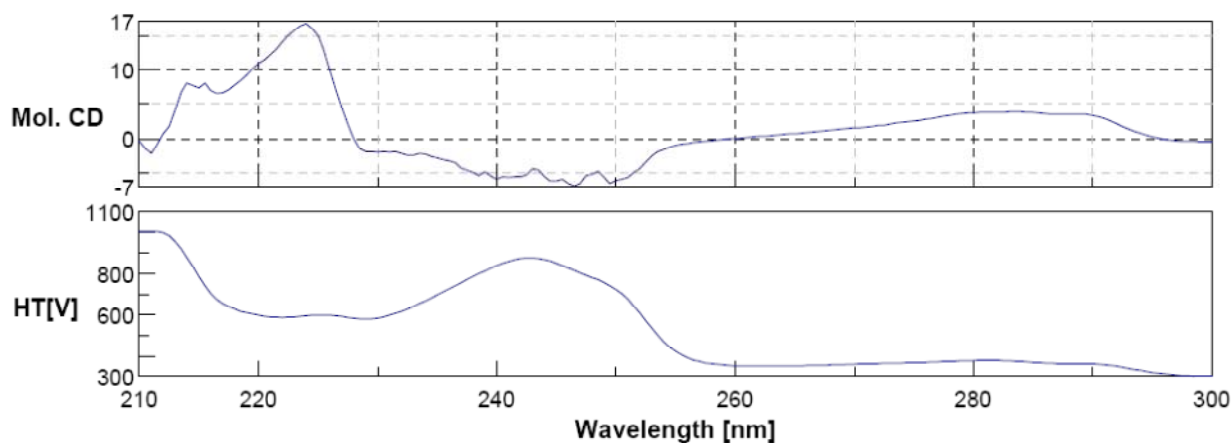

CD spectrum: 0.0001 M in *n*-hexane at 20 °C.

(2*R*,3*S*)-methyl 3-(2-ethoxy-2-oxoethyl)-2-methylindoline-1-carboxylate **8e**; (*S,S*)-NHC<sup>HI</sup> (**3**) was used.

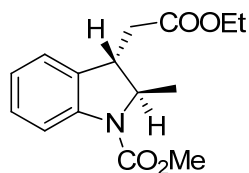

Colorless oil, 36% yield (19.9 mg), <sup>1</sup>H NMR (400 MHz, CDCl<sub>3</sub>): δ 1.31 (t, *J* = 7.1 Hz, 3H), 1.37 (d, *J* = 6.4 Hz, 3H), 2.56-2.58 (m, 2H), 3.30 (t, *J* = 7.4 Hz, 1H), 3.89 (s, 3H), 4.22 (qd, *J* = 7.2, 1.7 Hz, 2H), 4.27 (brd, 1H), 7.03 (t, *J* = 7.4 Hz, 1H), 7.22 (d, *J* = 7.4 Hz, 1H), 7.27 (t, *J* = 7.6 Hz, 1H), 7.47-7.88 (m, 1H). <sup>13</sup>C NMR (100 MHz, CDCl<sub>3</sub>): 14.2, 20.4, 28.4, 29.7, 40.6, 44.2, 52.5, 60.7, 61.5, 115.5, 122.9, 124.8, 128.3, 171.7. IR (neat, cm<sup>-1</sup>): 2958, 1704, 1602, 1484, 1440, 1336, 1281, 1170, 1059, 1023, 752. EI-HRMS: calcd. for C<sub>15</sub>H<sub>20</sub>NO<sub>4</sub>: 278.1386, found: 278.1380.

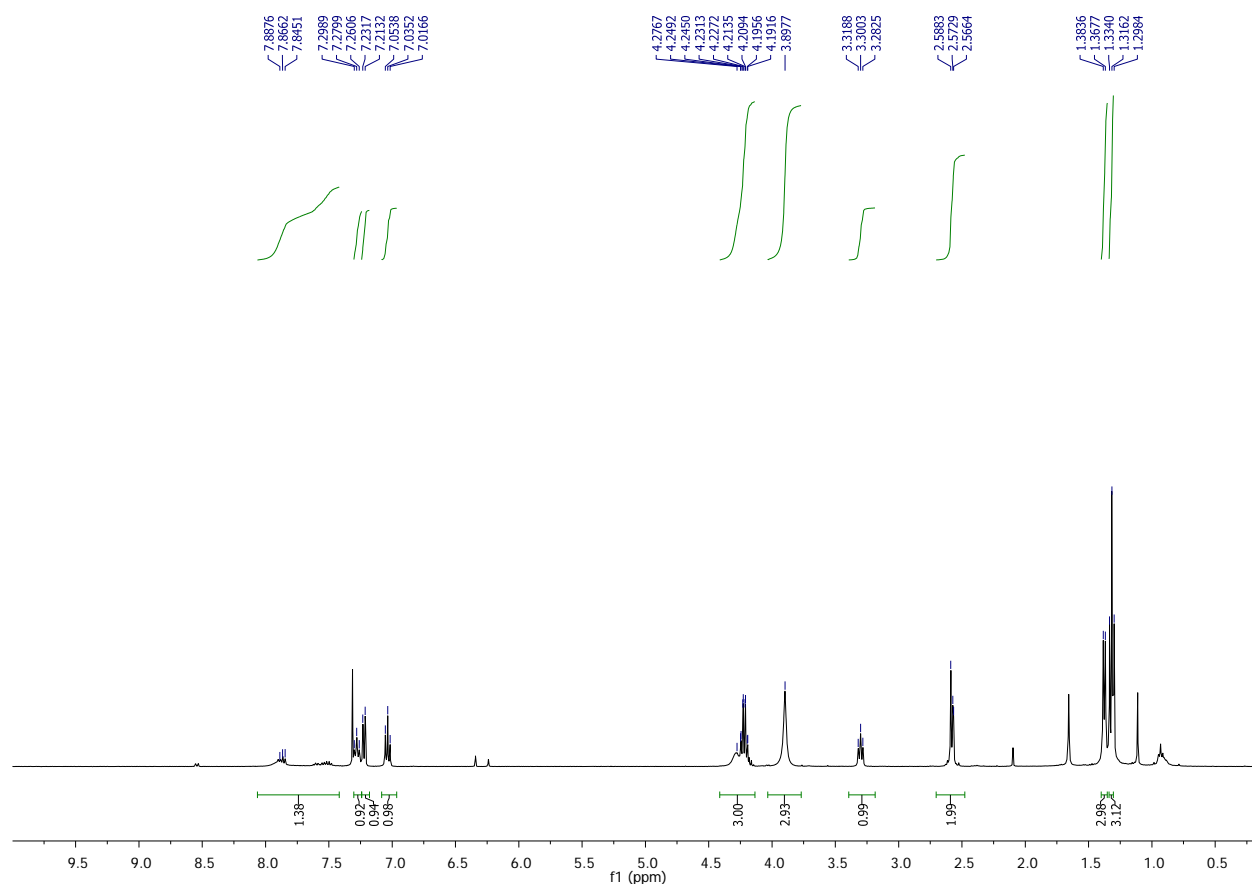

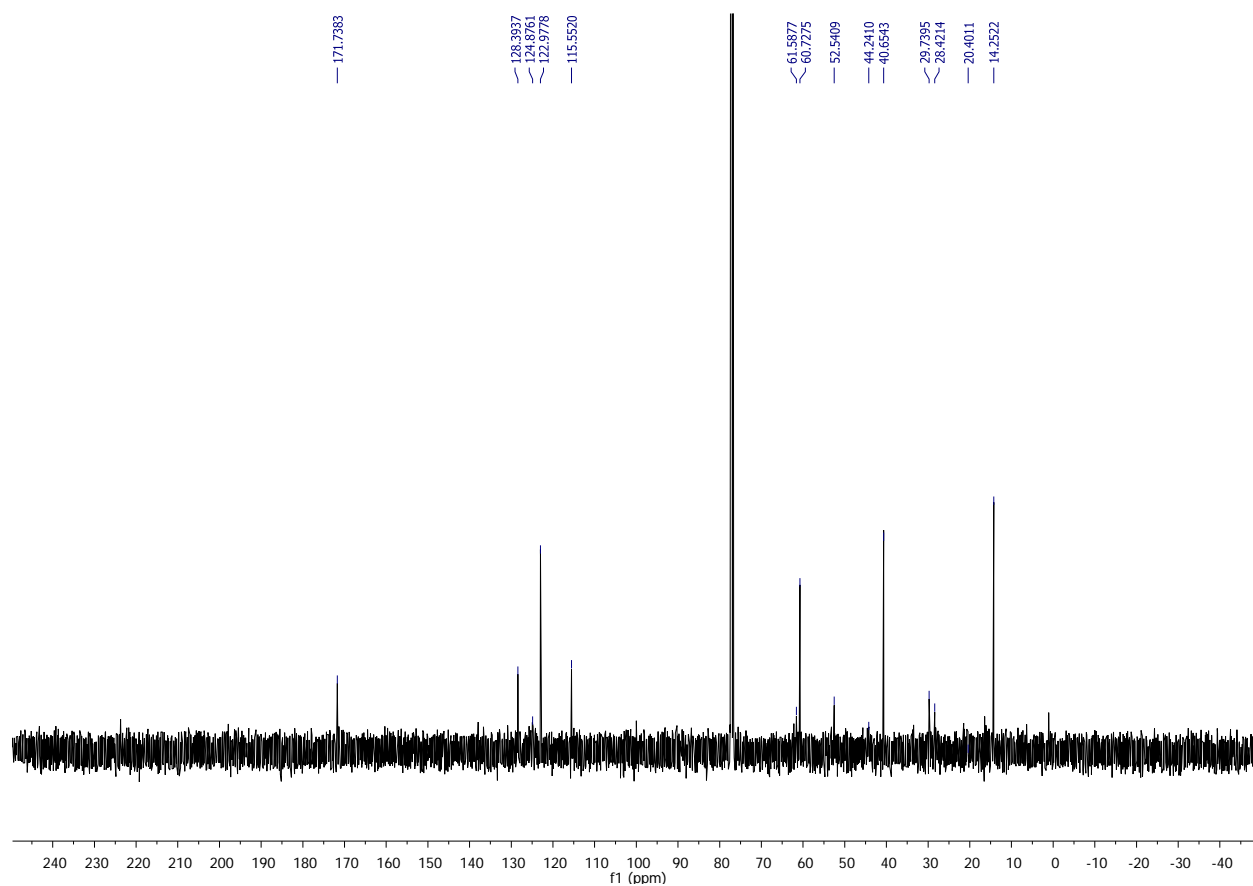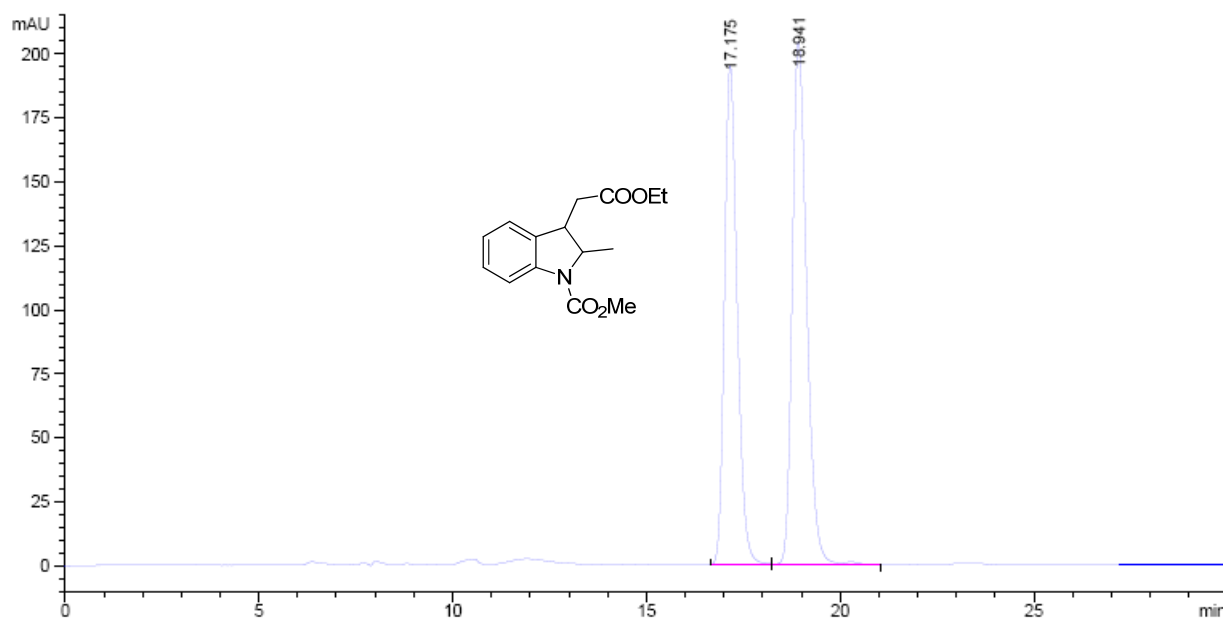

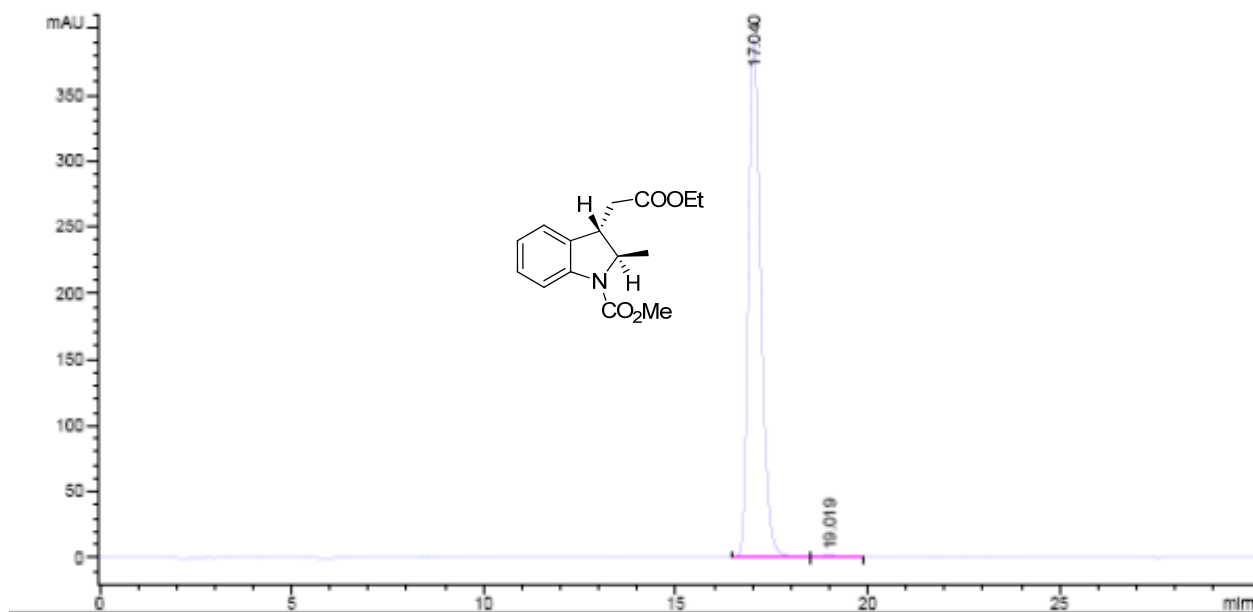

-----  
Area Percent Report  
-----

Sorted By : Signal  
Multiplier : 1.0000  
Dilution : 1.0000  
See Multiplier & Dilution Factor with ISTDs

Signal 1: DAD1 A, Sig-254,4 Ref-off

| Peak # | RetTime [min] | Type | Width [min] | Area [mAU*s] | Height [mAU] | Area %  |
|--------|---------------|------|-------------|--------------|--------------|---------|
| 1      | 17.040        | BV   | 0.3541      | 8920.82617   | 391.05496    | 99.1643 |
| 2      | 19.019        | VB   | 0.4779      | 75.17872     | 2.32065      | 0.8357  |

Totals : 8996.00489 393.37562

-----  
\*\*\* End of Report \*\*\*  
-----

$[\alpha]_D^{20} = -8.43$  ( $c = 0.5$  in  $\text{CH}_2\text{Cl}_2$ ). 98% *ee*, [chiral column: AS-H, *n*-hexane/*i*-PrOH = 99 : 1, 0.5 mL/min, 254 nm;  $t_R = 17.04$  min. (major) and 19.01 (minor)].

(*S*)-methyl 2-(methoxymethyl)indoline-1-carboxylate **7f**; (*S,S*)-NHC·HI (**3**) was used.

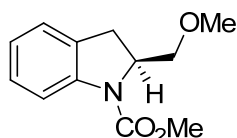

Colorless oil, 62% yield, calcd. by NMR (27.4 mg), <sup>1</sup>H NMR (400 MHz, CDCl<sub>3</sub>): 3.01 (dd,  $J = 16.4, 2.4$  Hz, 1H), 3.25 (dd,  $J = 16, 9.6$  Hz, 1H), 3.58 (dd,  $J = 9.2, 4$  Hz, 1H), 3.83 (s, 3H), 4.50-4.70 (m, 1H), 7.14 (d,  $J = 7.6$  Hz, 1H), 7.15 (t,  $J = 8.4$  Hz, 1H), 7.32-8.00 (brd, 1H). <sup>13</sup>C NMR (125 MHz):  $\delta = 31.3, 52.5, 58.1, 59.0, 72.9, 115.2, 122.9, 124.9, 127.2, 130.1, 141.8,$

153.6. MS (ESI, 70 eV):  $m/z$  (%) = 244 (M+H)<sup>+</sup>; IR (neat):  $\nu$  = 712, 752, 833, 860, 939, 972, 1021, 1055, 1116, 1137, 1192, 1225, 1282, 11308, 1332, 1379, 1440, 1462, 1484, 1602, 1702, 2926 cm<sup>-1</sup>; ESI-HRMS calcd. for C<sub>12</sub>H<sub>15</sub>NO<sub>3</sub>Na 244.0944, found 244.0944.

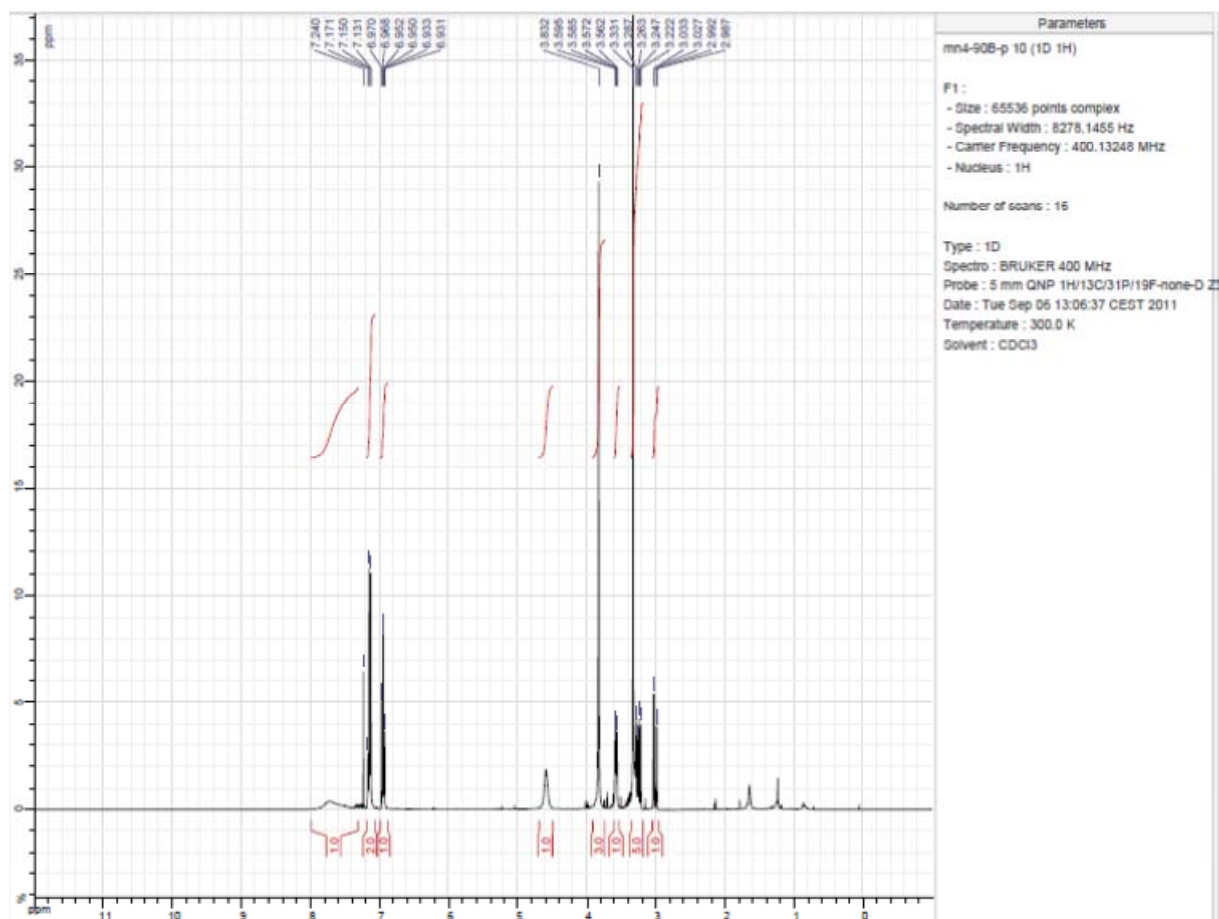

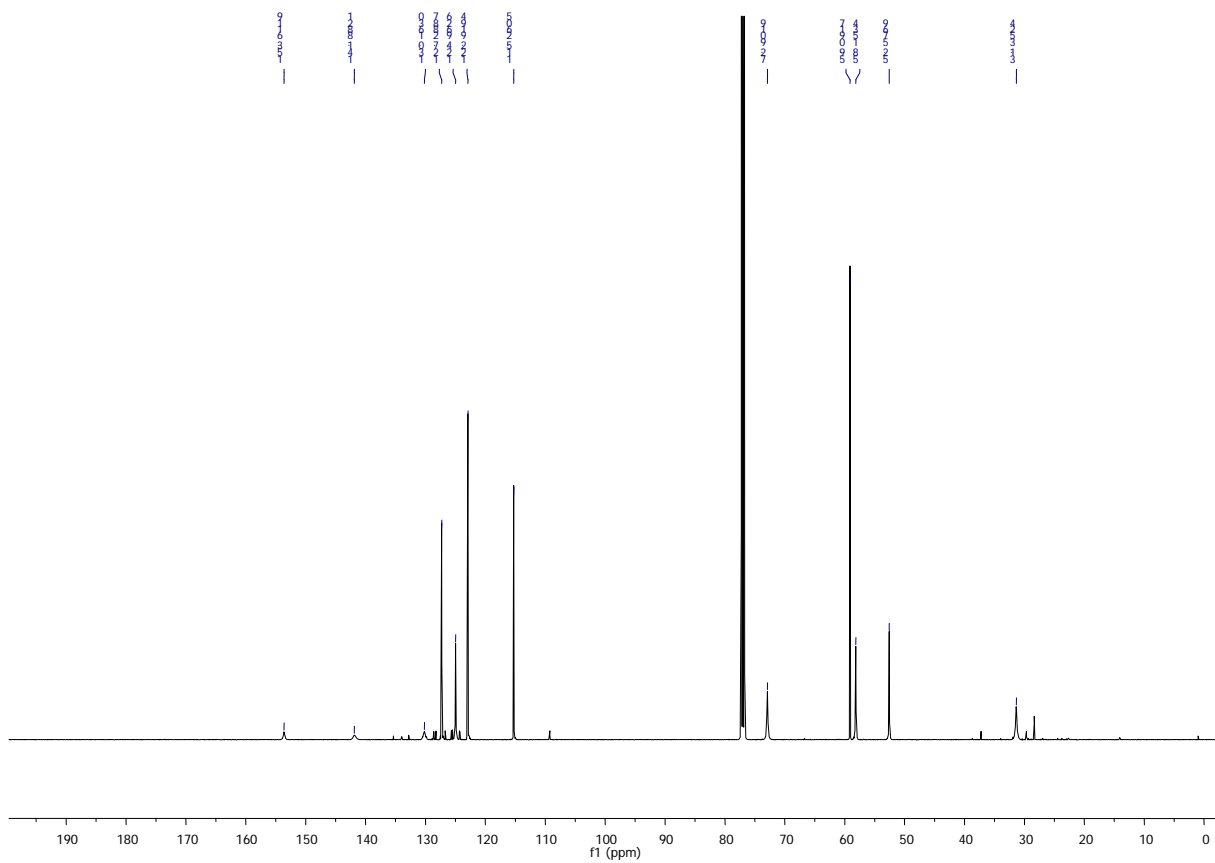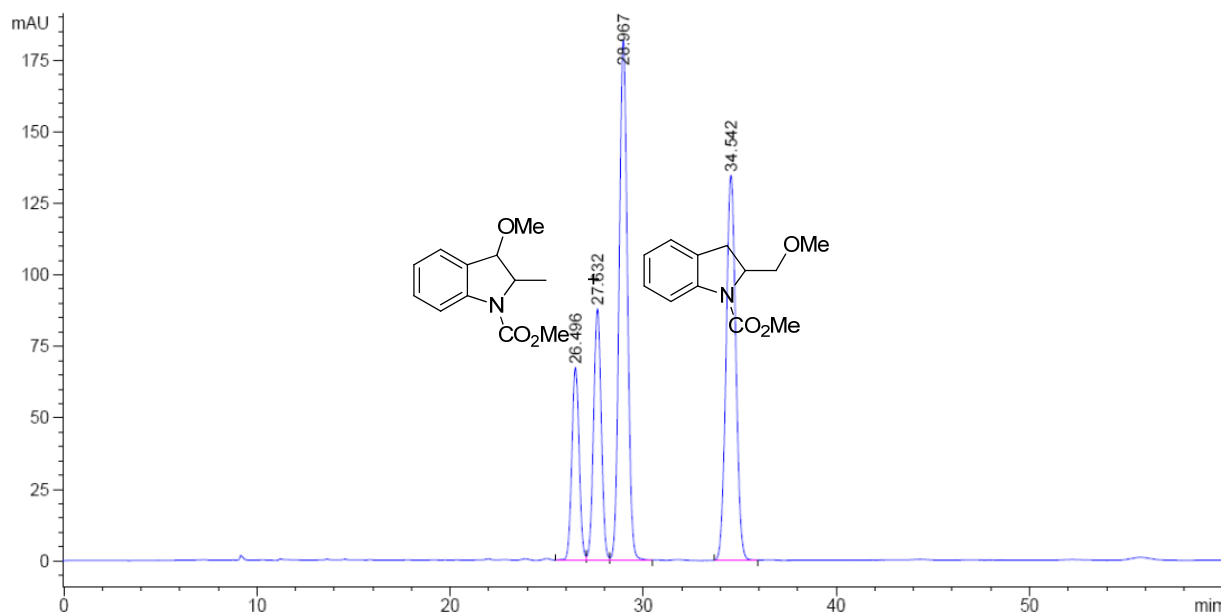



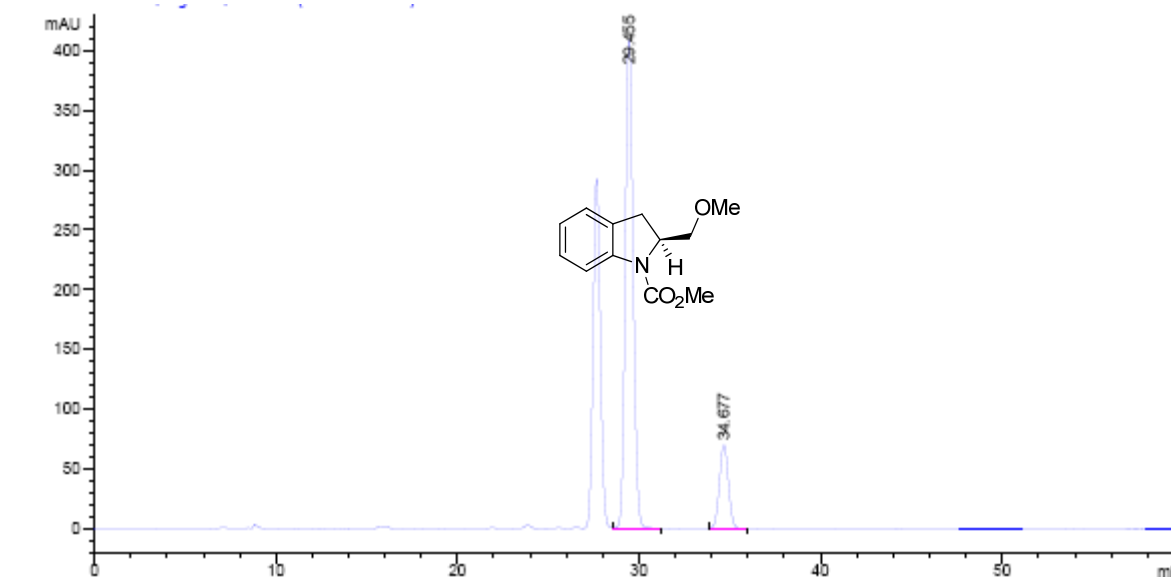

-----  
Area Percent Report  
-----

Sorted By : Signal  
Multiplier : 1.0000  
Dilution : 1.0000  
Use Multiplier & Dilution Factor with ISTDs

Signal 1: DAD1 A, Sig-254,4 Ref-off

| Peak # | RetTime [min] | Type | Width [min] | Area [mAU*s] | Height [mAU] | Area %  |
|--------|---------------|------|-------------|--------------|--------------|---------|
| 1      | 29.455        | VB   | 0.4995      | 1.24126e4    | 407.29547    | 83.6909 |
| 2      | 34.677        | BB   | 0.5486      | 2418.88599   | 69.75639     | 16.3091 |

Totals : 1.48315e4 477.05186

-----  
\*\*\* End of Report \*\*\*  
-----

**7f**: 67% *ee* [chiral column: AD-H, *n*-hexane/*i*-PrOH = 99 : 1, 0.5 mL/min, 254 nm;  $t_R$  = 29.45 min. (major) and 34.67 (minor)].

(*S*)-methyl 2-(methoxymethyl)indoline-1-carboxylate **7f** and (2*R*,3*S*)-methyl 3-methoxy-2-methylindoline-1-carboxylate **8f**; (*S,S*)-NHC·HI (**3**) was used.

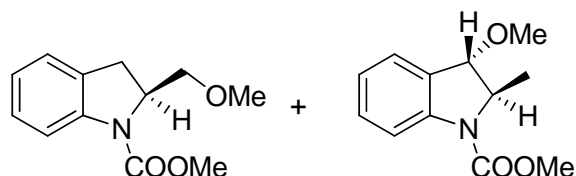

Colorless oil, 24% yield calcd. by NMR (10.6 mg), **7f** + **8f**:  $^1\text{H}$  NMR (400 MHz,  $\text{CDCl}_3$ ):  $\delta$  1.26 (d,  $J$  = 7.0 Hz, 1.5H), 3.03 (dd,  $J$  = 16.2, 2.1 Hz, 1H), 3.27 (dd,  $J$  = 16.4, 9.7 Hz, 1H), 3.33 (s, 1.5H), 3.34 (s, 3H), 3.60 (dd,  $J$  = 9.0, 3.9 Hz, 1H), 3.84 (s, 4.5H), 4.29 (brd, 0.5H),

4.39 (brd, 0.5H), 4.61 (brd, 1H), 6.96 (t,  $J = 7.4$  Hz, 1H), 7.04 (t,  $J = 7.4$  Hz, 0.5H), 7.14-7.18 (m, 2H), 7.33-7.39 (m, 1H), 7.70 (brd, 1.5H). **7f** + **8f**:  $^{13}\text{C}$  NMR (100 MHz,  $\text{CDCl}_3$ ): 14.3, 18.5, 28.4, 31.4, 52.6, 53.0, 55.1, 58.2, 58.7, 59.1, 61.0, 72.9, 74.7, 84.7, 115.3, 115.9, 122.6, 123.0, 125.0, 127.3, 127.9, 128.0, 128.9, 130.4, 131.2, 133.2, 155.7.

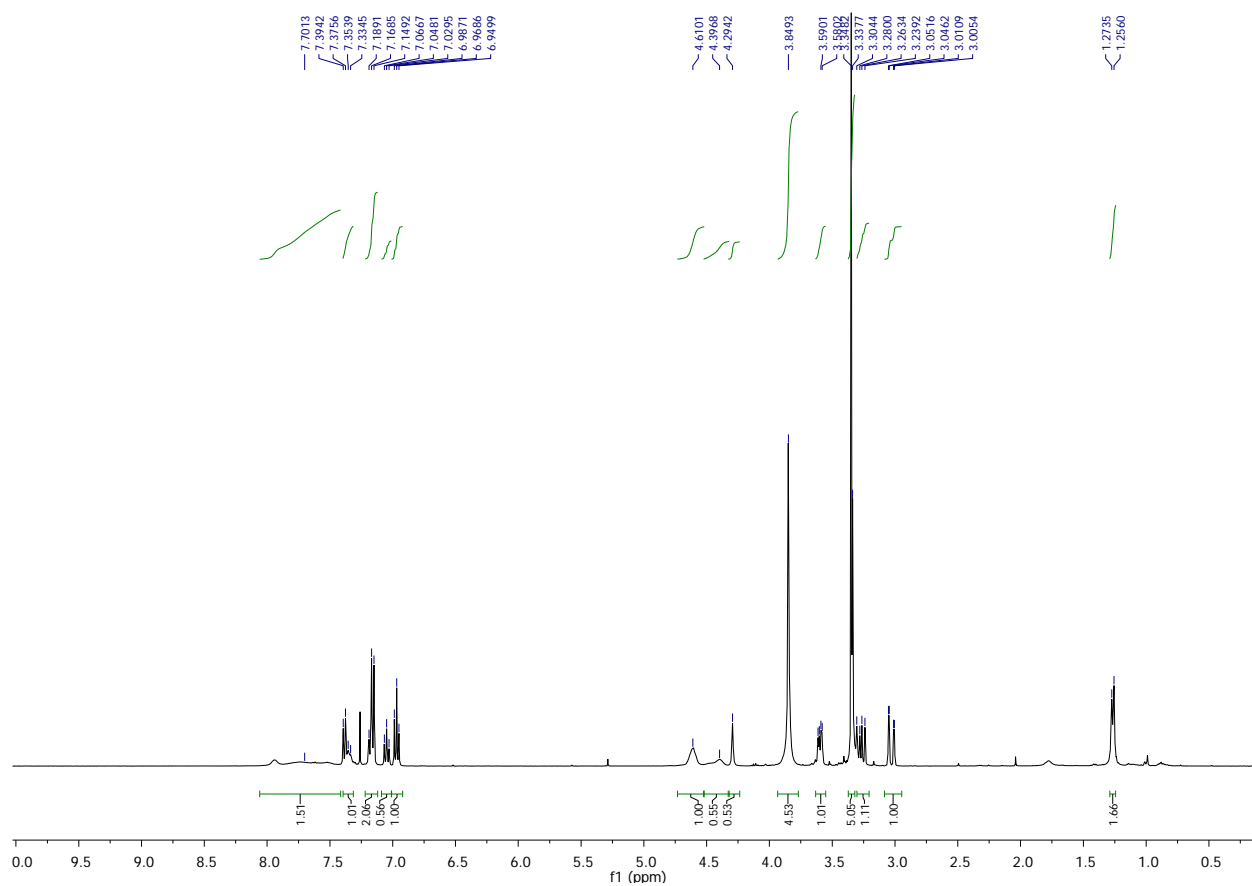

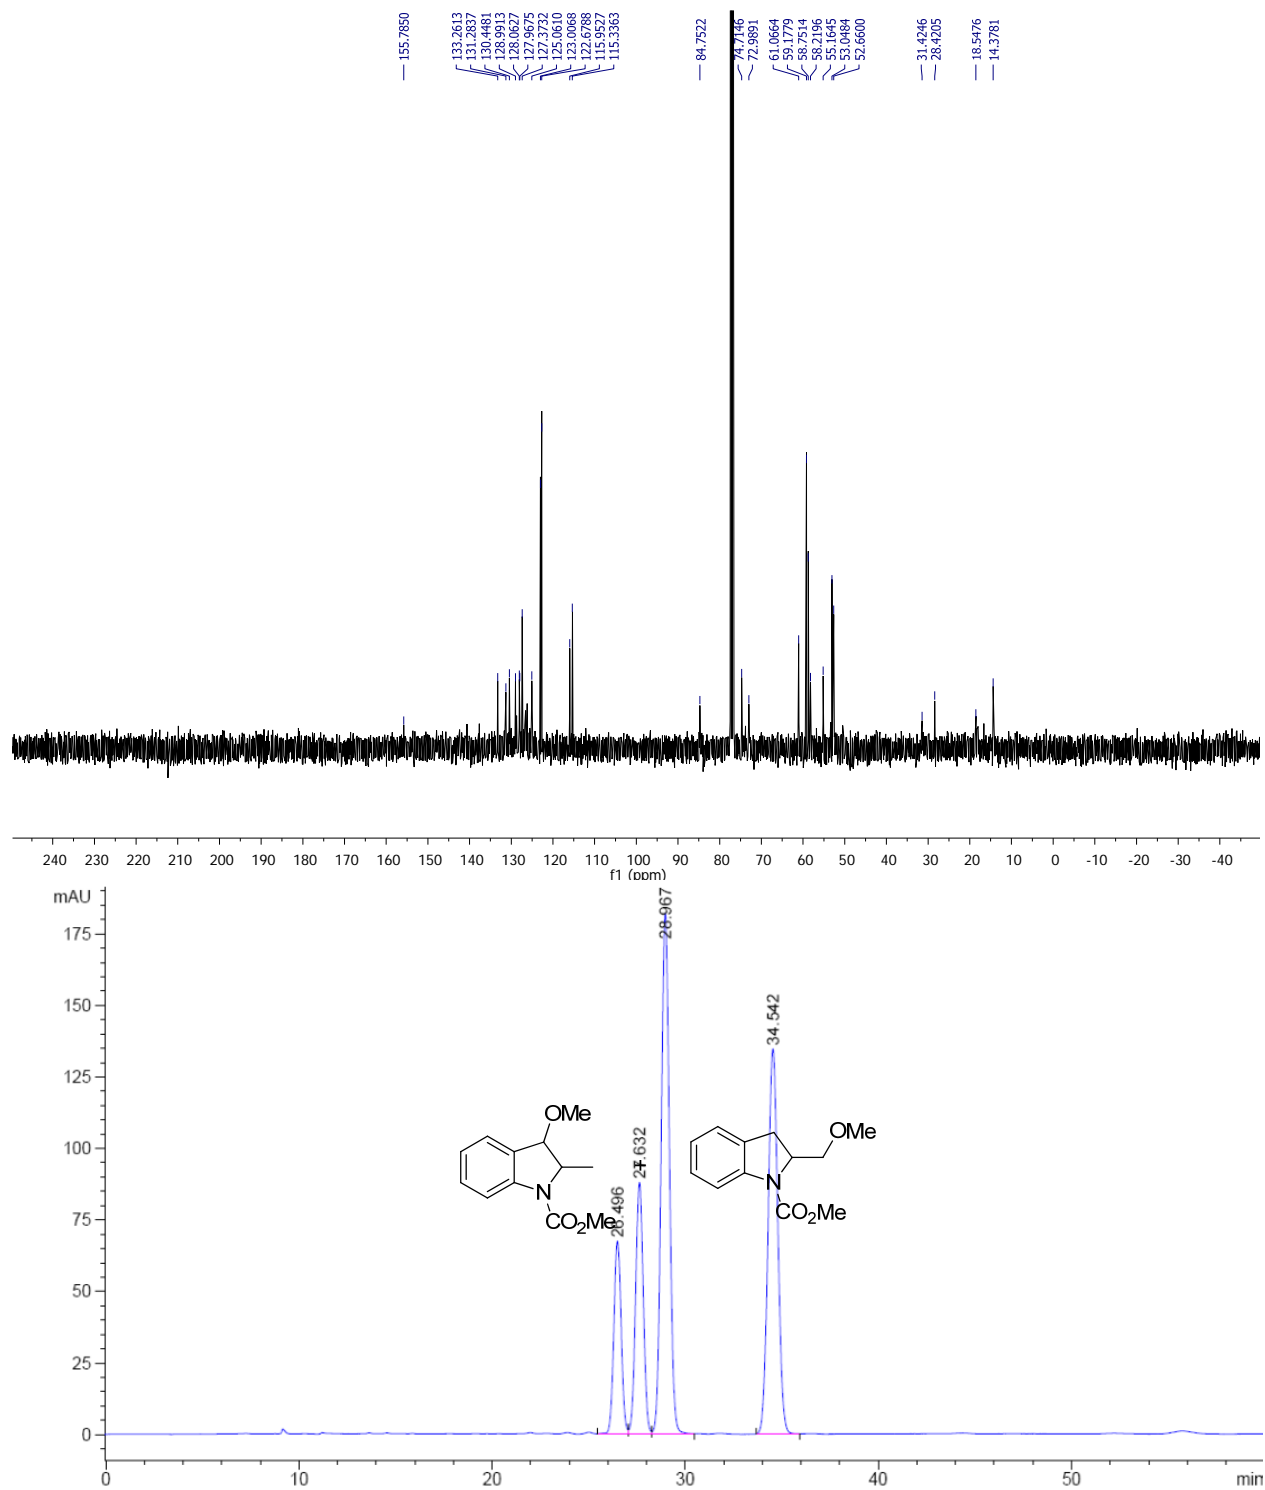

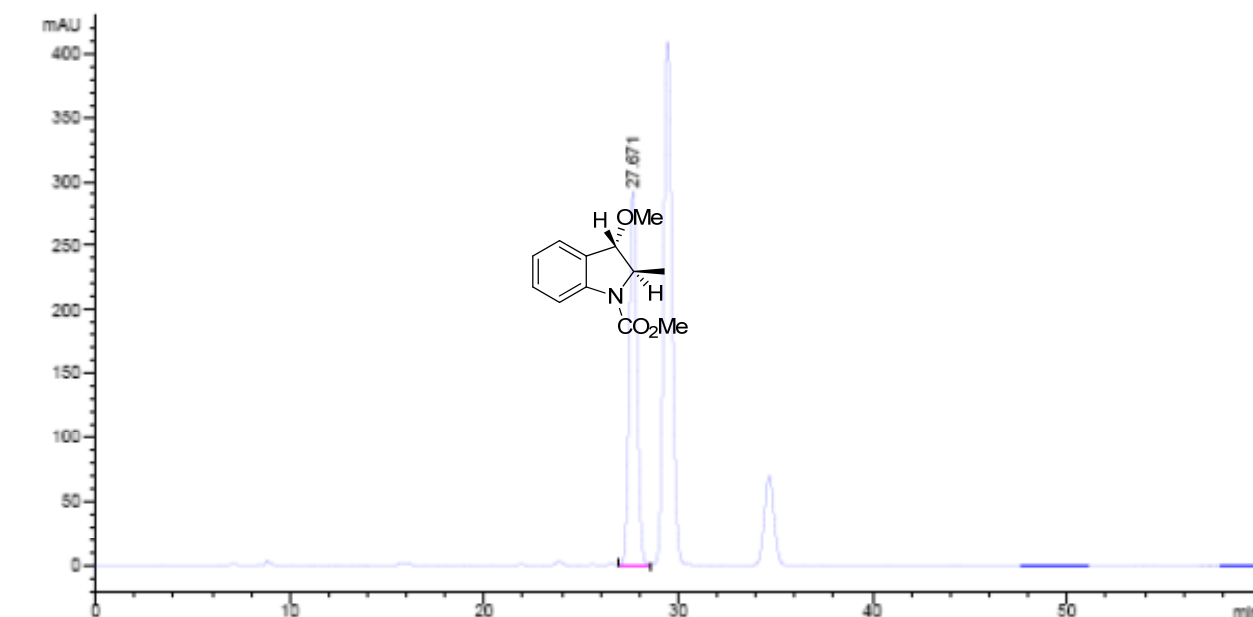

-----  
Area Percent Report  
-----

Sorted By : Signal  
Multiplier : 1.0000  
Dilution : 1.0000  
Use Multiplier & Dilution Factor with ISTDs

Signal 1: DAD1 A, Sig-254,4 Ref-off

| Peak # | RetTime [min] | Type | Width [min] | Area [mAU*s] | Height [mAU] | Area %   |
|--------|---------------|------|-------------|--------------|--------------|----------|
| 1      | 27.671        | VV   | 0.4539      | 8144.41992   | 291.55579    | 100.0000 |

Totals : 8144.41992 291.55579

-----  
\*\*\* End of Report \*\*\*  
-----

**8f**: >99% *ee* [chiral column: AD-H, *n*-hexane/*i*-PrOH = 99 : 1, 0.5 mL/min, 254 nm;  $t_R$  = 27.67 min. (major)].

(*R*)-methyl 2-benzylindoline-1-carboxylate **7g**; (*S,S*)-NHC<sup>HI</sup> (**4**) was used.

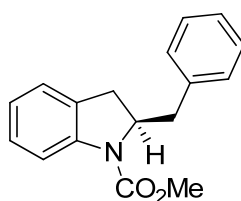

Colorless oil, 49% yield (26.2 mg), 95% *ee*,  $^1\text{H}$  NMR (400 MHz,  $\text{CDCl}_3$ ): 2.61 (dd,  $J = 12.8, 10$  Hz, 1H), 2.80 (dd,  $J = 16, 1.6$  Hz, 1H), 3.13 (dd,  $J = 16.4, 9.6$  Hz, 1H), 3.00-3.42 (m, 1H), 3.84 (s, 3H), 4.60-4.80 (m, 1H), 6.98 (t,  $J = 7.2$  Hz, 1H), 7.15 (d,  $J = 7.6$  Hz, 1H), 7.17-7.28

(m, 4H), 7.28-7.36 (m, 2H), 7.38-8.30 (brd, 1H).  $^{13}\text{C}$  NMR (125 MHz):  $\delta$  = 32.7, 40.3, 52.5, 60.6, 115.3, 122.8, 125.1, 126.5, 127.0, 127.5, 128.4, 128.7, 129.5, 137.7, 141.6, 153.6. MS (ESI, 70 eV):  $m/z$  (%) = 268 ( $\text{M}+\text{H}$ ) $^+$ ; IR (neat):  $\nu$  = 698, 725, 759, 845, 870, 894, 918, 936, 1020, 1058, 1087, 1128, 1145, 1191, 1232, 1275, 1309, 1359, 1391, 1441, 1484, 1602, 1703, 2855, 2913, 2948, 3029, 3064  $\text{cm}^{-1}$ ; ESI-HRMS calcd. for  $\text{C}_{17}\text{H}_{18}\text{NO}_2$  268.1332, found 268.1338.

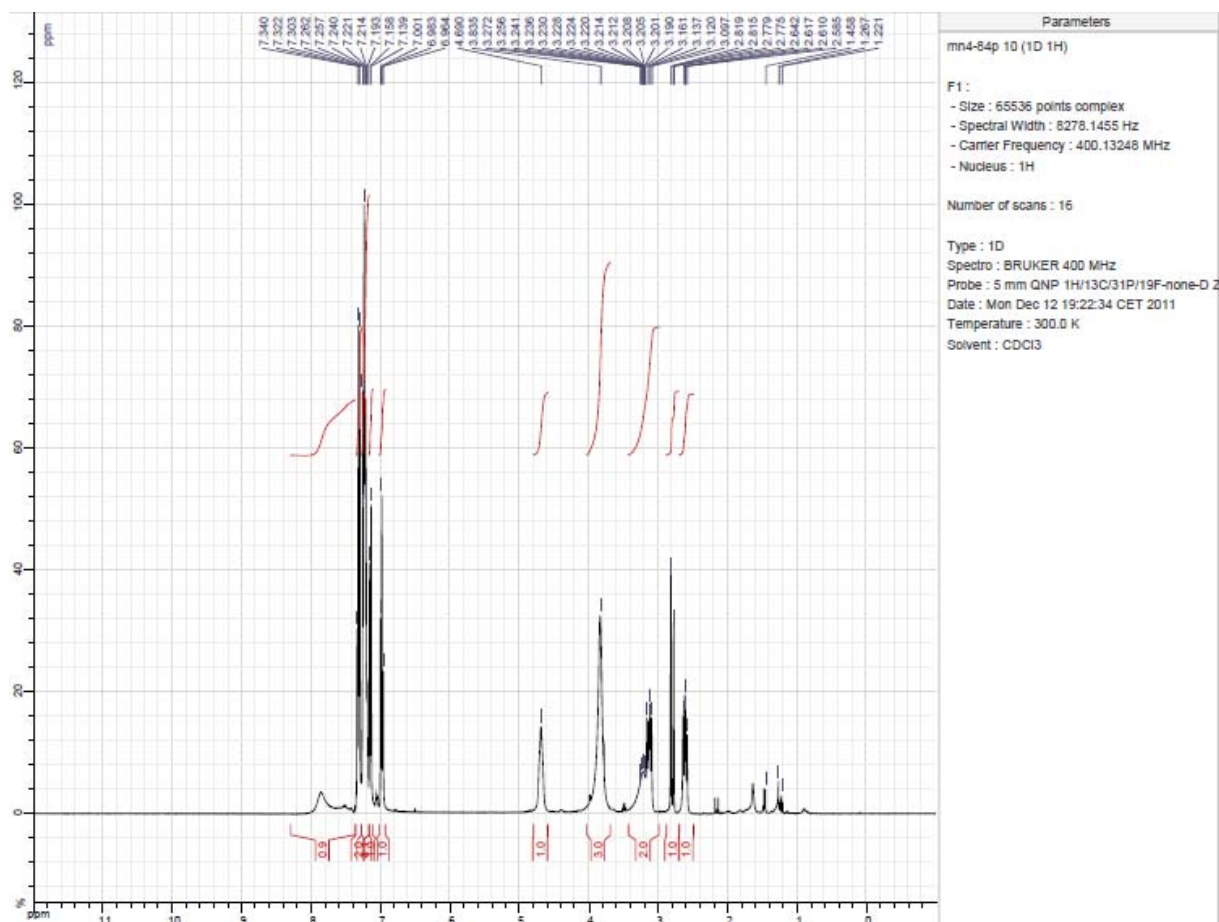

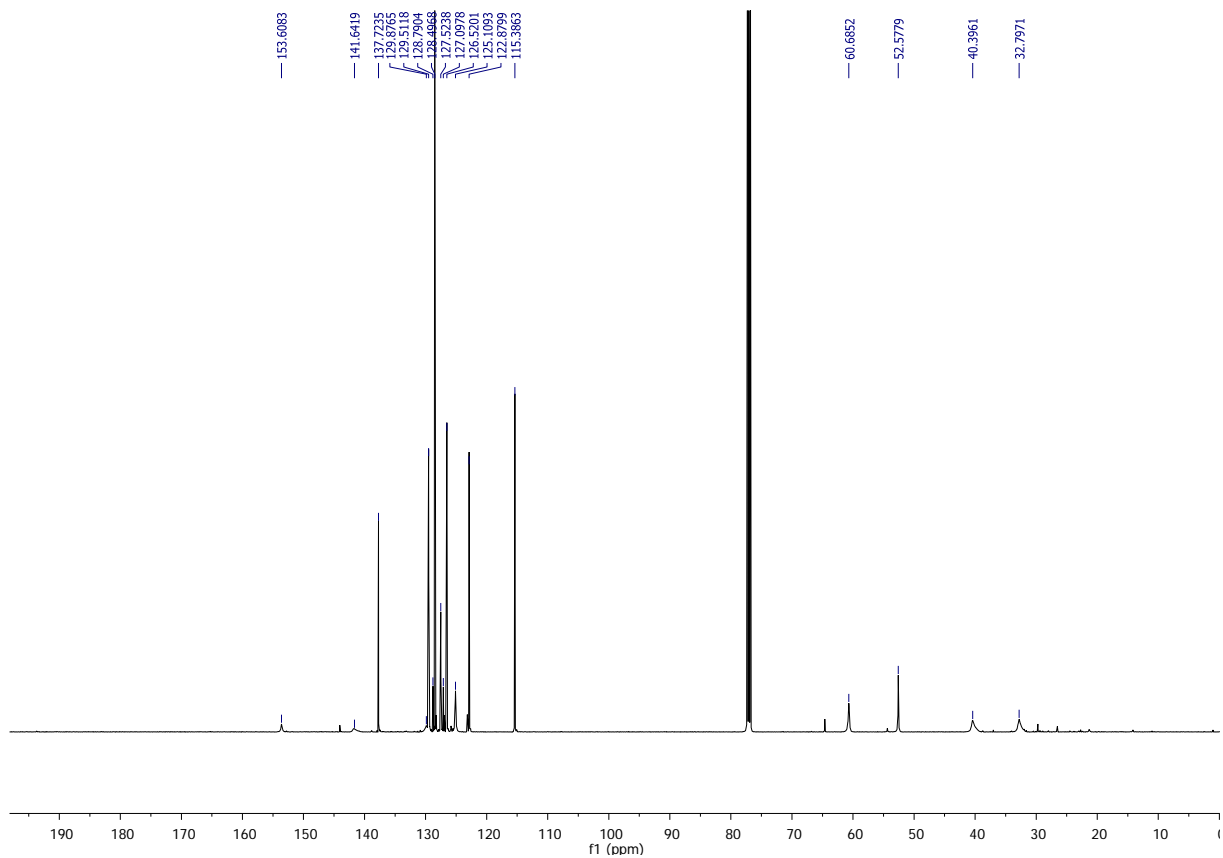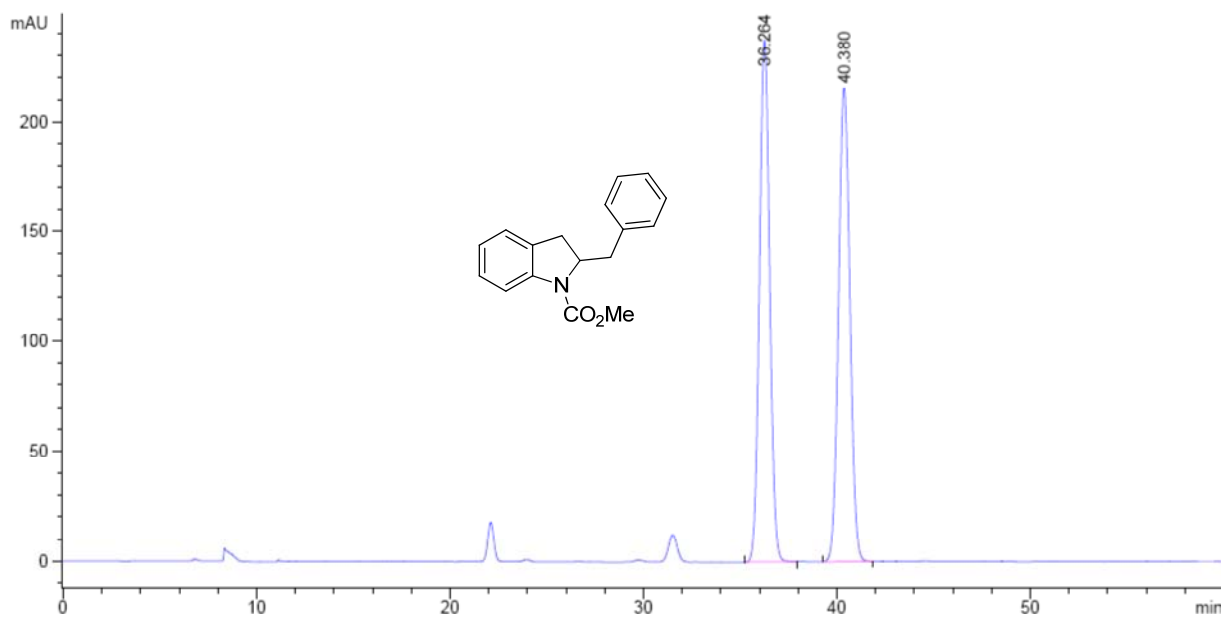

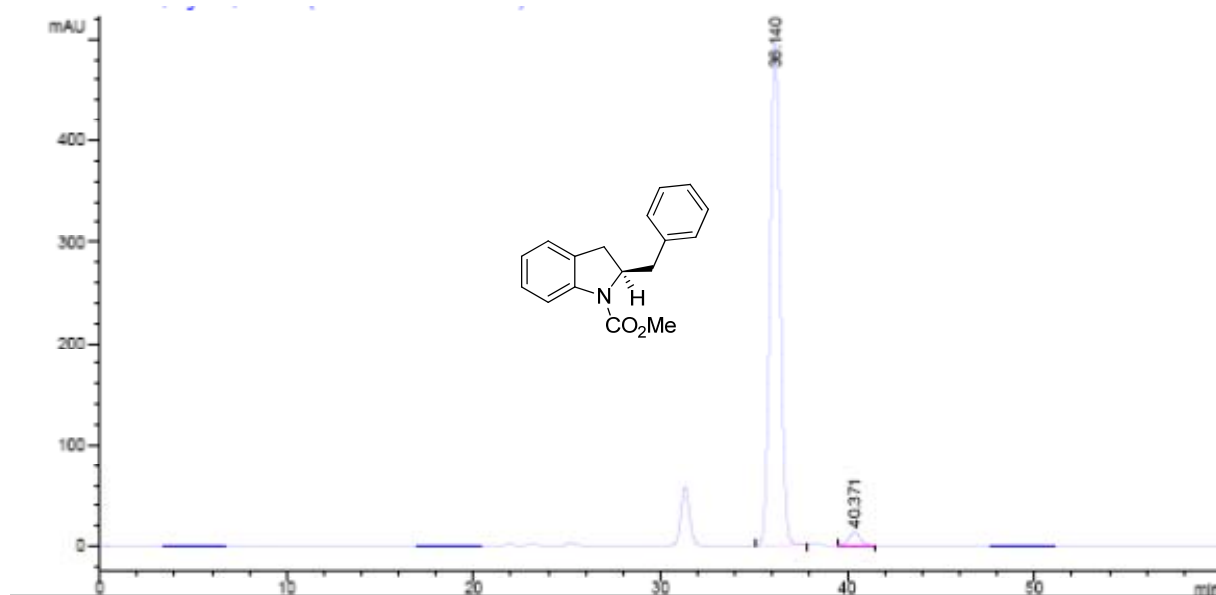

-----  
Area Percent Report  
-----

Sorted By : Signal  
Multiplier : 1.0000  
Dilution : 1.0000  
Use Multiplier & Dilution Factor with ISTDs

Signal 1: DAD1 A, Sig-254,4 Ref-off

| Peak # | RetTime [min] | Type | Width [min] | Area [mAU*s] | Height [mAU] | Area %  |
|--------|---------------|------|-------------|--------------|--------------|---------|
| 1      | 36.140        | BB   | 0.5950      | 1.88282e4    | 495.83286    | 97.3249 |
| 2      | 40.371        | BB   | 0.6395      | 517.52594    | 12.59264     | 2.6751  |

Totals : 1.93457e4 508.42550

-----  
\*\*\* End of Report \*\*\*  
-----

$[\alpha]_D^{25} = -21.25$  ( $c = 1.0$  in  $\text{CH}_2\text{Cl}_2$ ), 95% *ee*, [chiral column: AD-H, *n*-hexane/*i*-PrOH = 99 : 1, 0.5 mL/min, 254 nm;  $t_R = 36.14$  min. (major) and 40.37 (minor)].

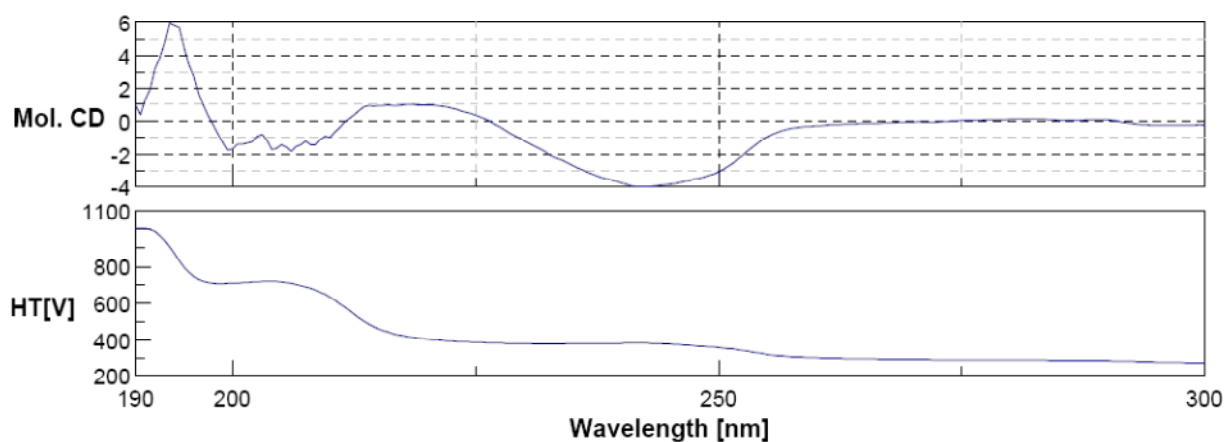

CD spectrum: 0.0001 M in *n*-hexane at 20 °C.

(2*R*,3*S*)-methyl 2-methyl-3-phenylindoline-1-carboxylate **8g**; (*S,S*)-NHC<sup>HI</sup> (**4**) was used.

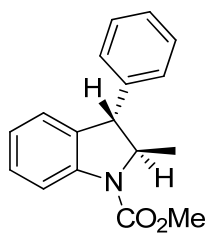

Colorless oil, 44% yield (23.5 mg), <sup>1</sup>H NMR (400 MHz, CDCl<sub>3</sub>): δ 1.46 (d, *J* = 6.1 Hz, 3H), 3.85 (s, 3H), 3.98 (d, *J* = 1.8 Hz, 1H), 4.39 (brd, 1H), 6.99 (t, *J* = 7.3 Hz, 1H), 7.03-7.06 (m, 3H), 7.20-7.29 (m, 4H), 7.81 (brd, 1H). <sup>13</sup>C NMR (100 MHz, CDCl<sub>3</sub>): 21.5, 52.7, 54.5, 64.8, 115.6, 123.3, 126.0, 127.1, 127.3, 128.4, 128.9, 144.2, 153.8. IR (neat, cm<sup>-1</sup>): EI-HRMS: calcd. for C<sub>17</sub>H<sub>18</sub>NO<sub>2</sub>: 268.1332, found: 268.1332.

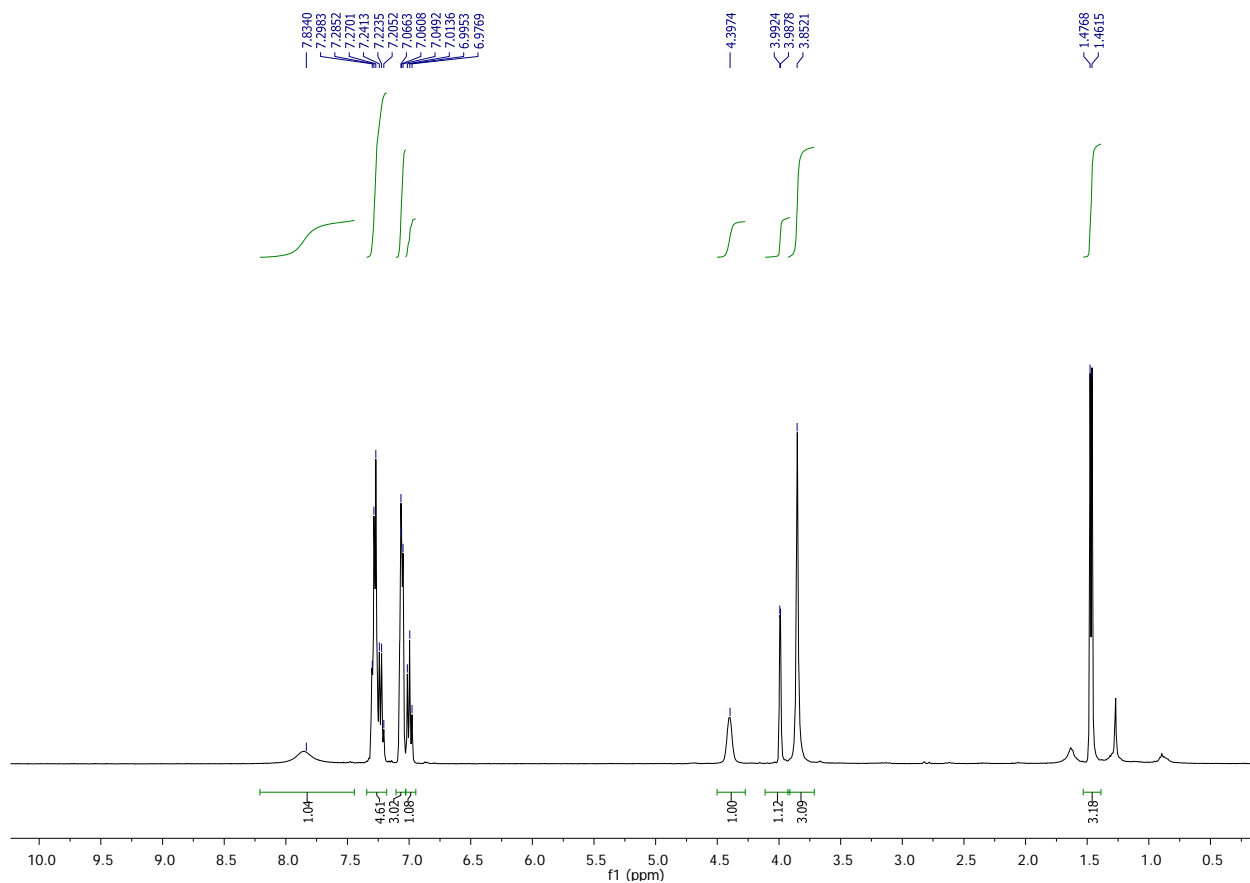



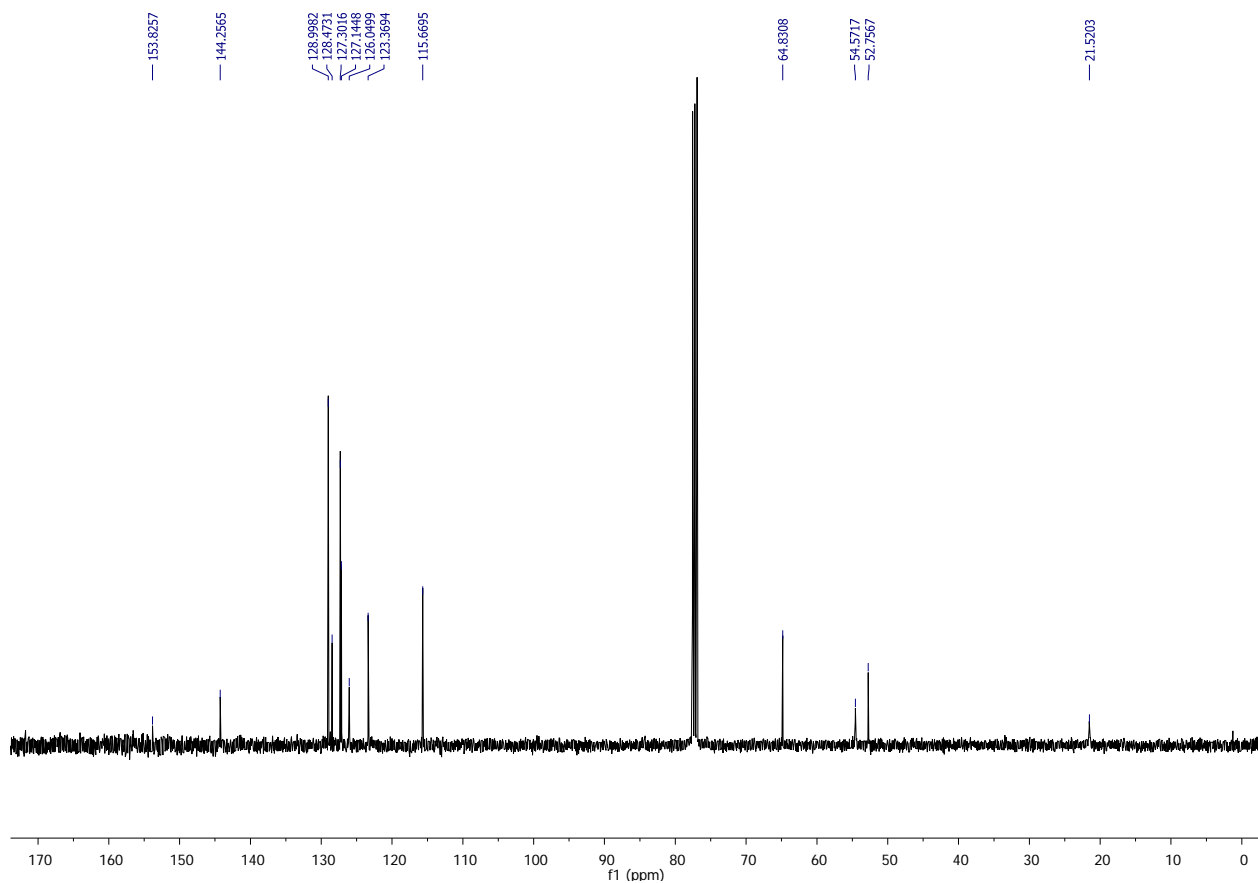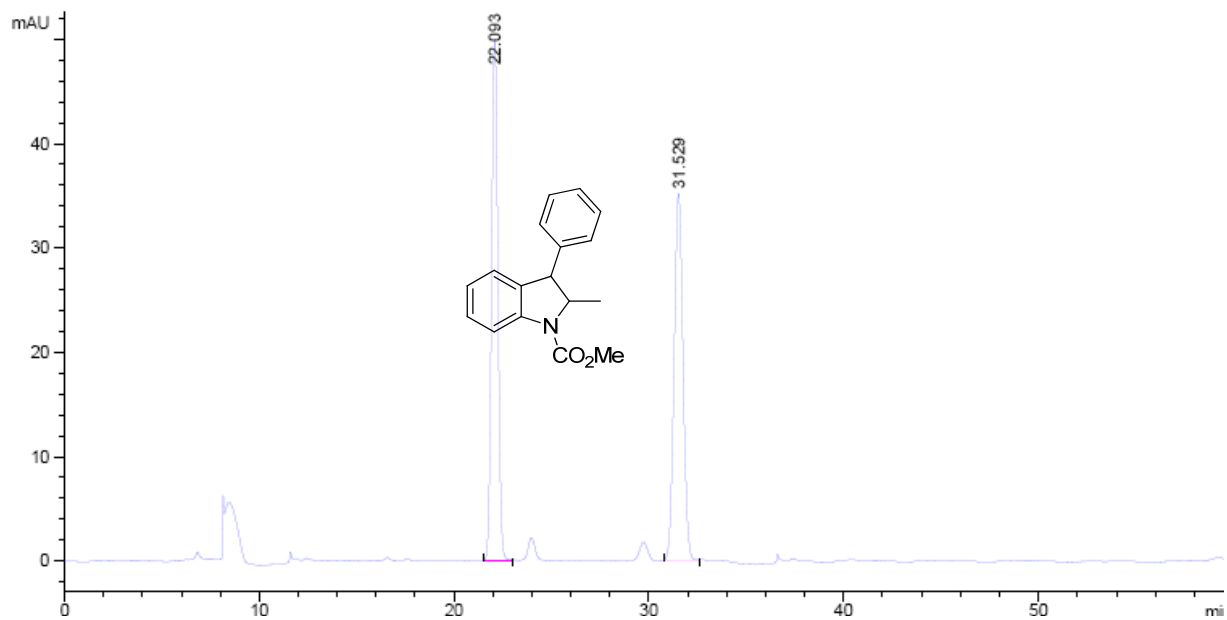

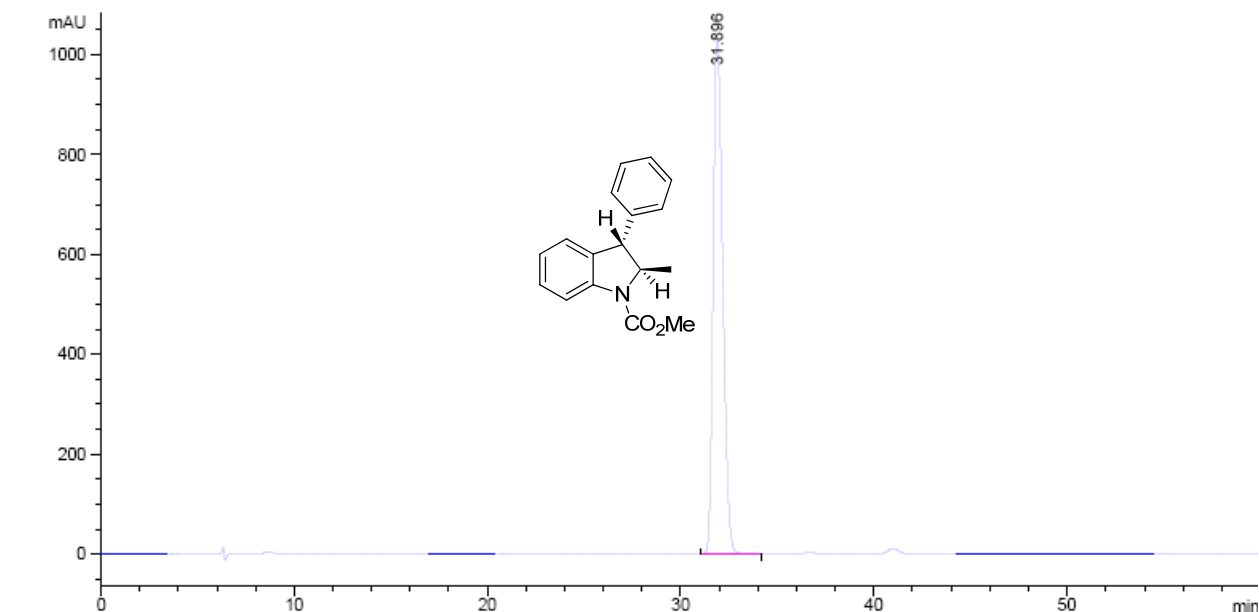

=====  
Area Percent Report  
=====

Sorted By : Signal  
Multiplier : 1.0000  
Dilution : 1.0000  
Use Multiplier & Dilution Factor with ISTDs

Signal 1: DAD1 A, Sig=254,4 Ref=off

| Peak # | RetTime [min] | Type | Width [min] | Area [mAU*s] | Height [mAU] | Area %   |
|--------|---------------|------|-------------|--------------|--------------|----------|
| 1      | 31.896        | BB   | 0.5378      | 3.55467e4    | 1032.11169   | 100.0000 |

Totals : 3.55467e4 1032.11169

=====  
\*\*\* End of Report \*\*\*  
=====

$[\alpha]_D^{20} = +110.15$  ( $c = 1.0$  in  $\text{CH}_2\text{Cl}_2$ ),  $>99\%$  *ee* [chiral column: AD-H, *n*-hexane/*i*-PrOH = 99 : 1, 0.5 mL/min, 254 nm;  $t_R = 31.89$  min. (major)].

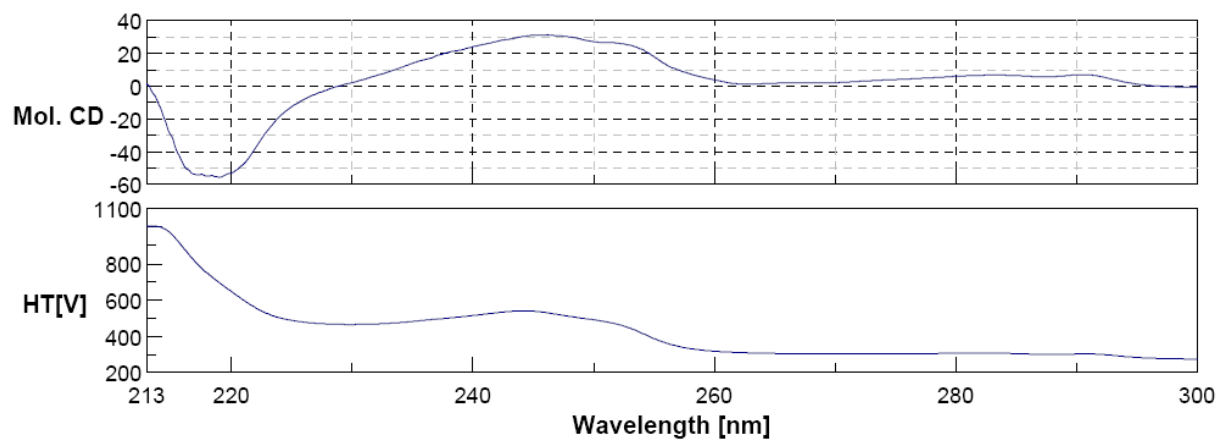

CD spectrum: 0.0001 M in *n*-hexane at 20 °C.

### 1.8. Preparation of (*S*)- and (*R*)-1-phenylpropan-2-amine:<sup>[5]</sup>

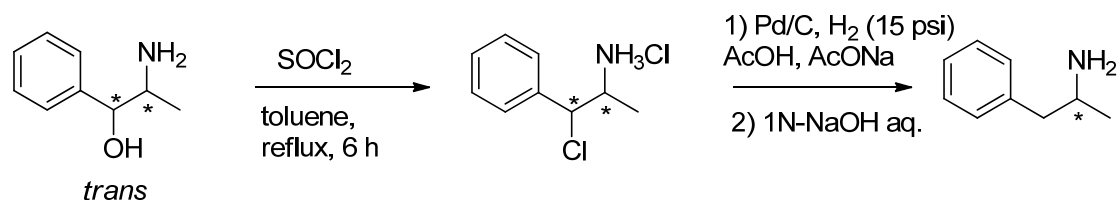

To a solution of (*L*)-(-)-norephedrine (4.0 g, 26.5 mmol, 1 eq.) in toluene (40 mL), thionyl chloride (4.0 g, 33.6 mmol, 1.26 eq.) was slowly added and the reaction mixture stirred at 60 °C for 6 hours. After cooling the reaction mixture to 10 °C, the product started to precipitate. The solid was collected by filtration, washed with toluene (20 mL) and dried in vacuo to afford the crude (*L*)-(-)-chloroamphetamine hydrochloride (5.1g, 95%).

A two neck round bottom flask (100 mL) with a magnetic stirring bar was charged with (*L*)-(-)-chloroamphetamine hydrochloride (5.0 g, 24.2 mmol), water (12 mL) and activated charcoal (5 g). Then 0.31 g of Pd/C (50 wt% water wet) was added along with sodium acetate (4.5 g, 54 mmol), and acetic acid (11.0 g, 183 mmol). The flask was put under a  $\text{H}_2$  atmosphere ( $\text{H}_2$  filled balloon) and stirred at 20 °C for 24 hours. The reaction mixture was filtered through a pad of celite and washed with water. The pH of the filtrate was adjusted to pH 12 with sodium hydroxide. The crude product was extracted with ethyl acetate, washed with brine and dried over  $\text{MgSO}_4$ . After filtration, volatiles were removed by rotary evaporator affording (*S*)-1-phenylpropan-2-amine in (3.2 g, 98%).

(*S*)-1-Phenylpropan-2-amine:

Colorless oil,  $[\alpha]_{\text{D}}^{25} = +23.1$  ( $c = 1.0$  in  $\text{CH}_2\text{Cl}_2$ ), >99% *ee*, [chiral column: AD-H, *n*-hexane/*i*-PrOH = 99 : 1, 0.5 mL/min, 254 nm;  $t_{\text{R}} = 29.56$  min. (major)].

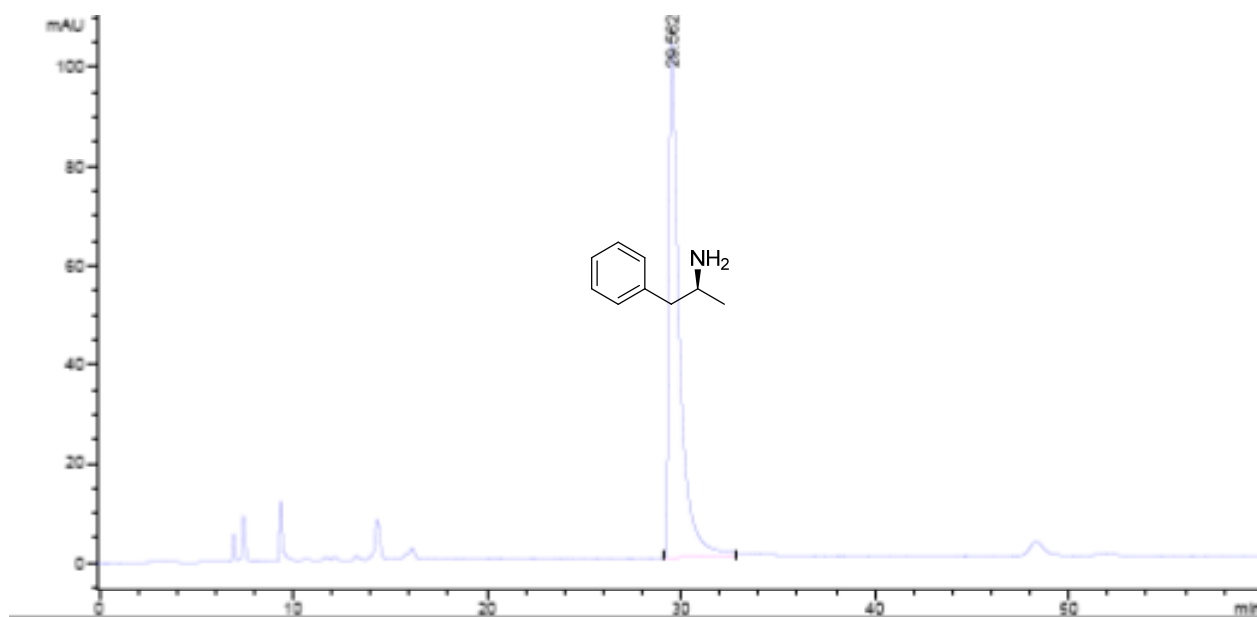

```
-----  
                          Area Percent Report  
-----  
Sorted By      :      Signal  
Multiplier    :      1.0000  
Dilution      :      1.0000  
Use Multiplier & Dilution Factor with ISTDs  
  
Signal 1: DAD1 A, Sig=254,4 Ref=off  
  
Peak RetTime Type Width Area Height Area  
# [min] |----| [min] [mAU*s] [mAU] %  
-----|----|-----|-----|-----|  
1 29.562 BB 0.5622 3946.68872 102.27239 100.0000  
  
Totals : 3946.68872 102.27239  
  
-----  
*** End of Report ***  
-----
```

(*R*)-1-phenylpropan-2-amine: Colorless oil,  $[\alpha]_D^{25} = -24.15$  ( $c = 1.0$  in  $\text{CH}_2\text{Cl}_2$ ), >99% *ee*  
[chiral column: AD-H, *n*-hexane/*i*-PrOH = 99 : 1, 0.5 mL/min, 254 nm;  $t_R = 32.24$  min.  
(major)].

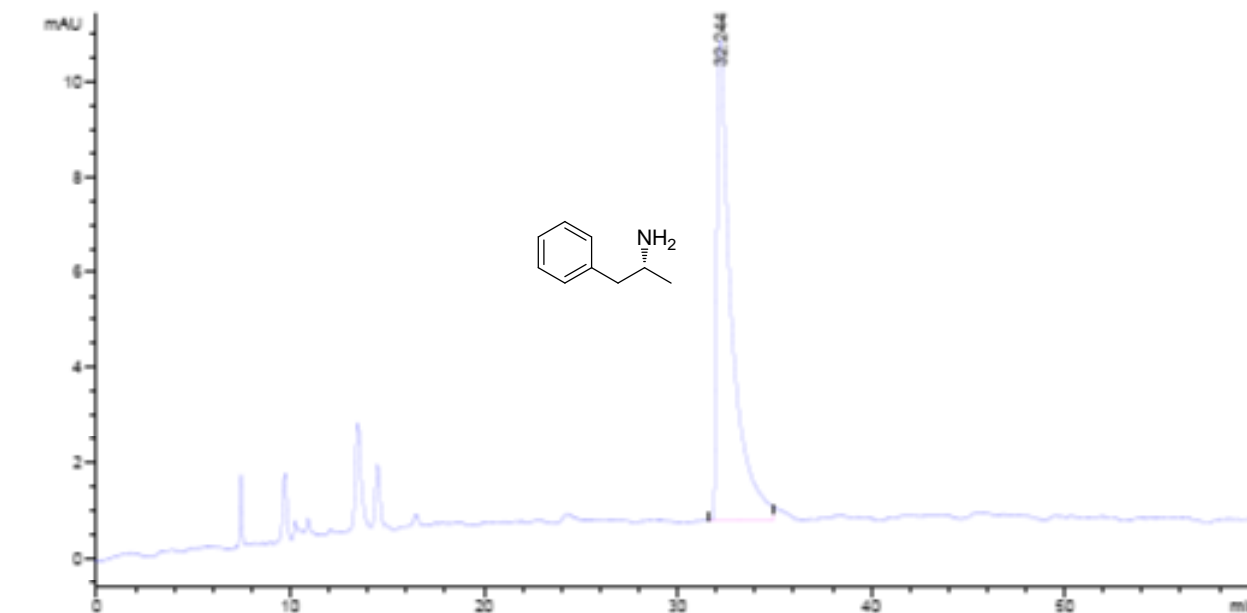

-----  
 Area Percent Report  
 -----

Sorted By : Signal  
 Multiplier : 1.0000  
 Dilution : 1.0000  
 Use Multiplier & Dilution Factor with ISTDs

Signal 1: DAD1 A, Sig=254,4 Ref=off

| Peak #   | RetTime [min] | Type | Width [min] | Area [mAU*s] | Height [mAU] | Area %   |
|----------|---------------|------|-------------|--------------|--------------|----------|
| 1        | 32.244        | BB   | 0.7621      | 529.71918    | 9.99876      | 100.0000 |
| Totals : |               |      |             | 529.71918    | 9.99876      |          |

-----  
 \*\*\* End of Report \*\*\*  
 -----

**1.9 Preparation of enantio-pure (R)- and (S)-methyl (2-bromophenyl)(1-phenylpropan-2-yl)carbamate 6g:**

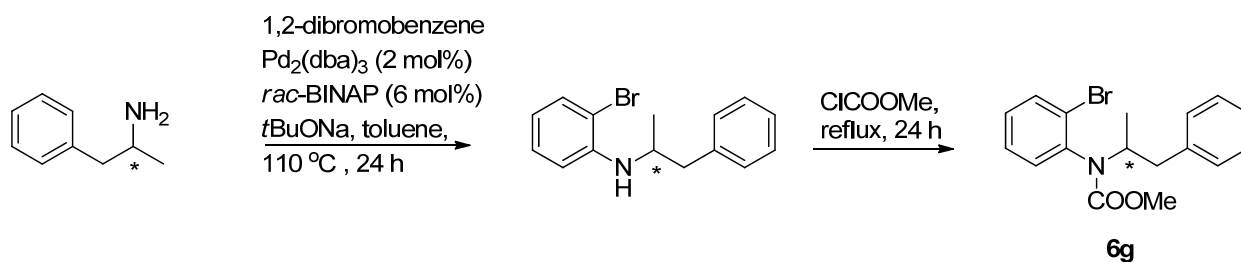

(R)-methyl (2-bromophenyl)(1-phenylpropan-2-yl)carbamate **6g**:

$[\alpha]_D^{25} = -29.15$  ( $c = 1.0$  in  $\text{CH}_2\text{Cl}_2$ ), 99% *ee*, [chiral column: AD-H, *n*-hexane/*i*-PrOH = 99 : 1, 0.5 mL/min, 254 nm;  $t_R = 34.56$  min. (minor) and 52.62 min. (major)].

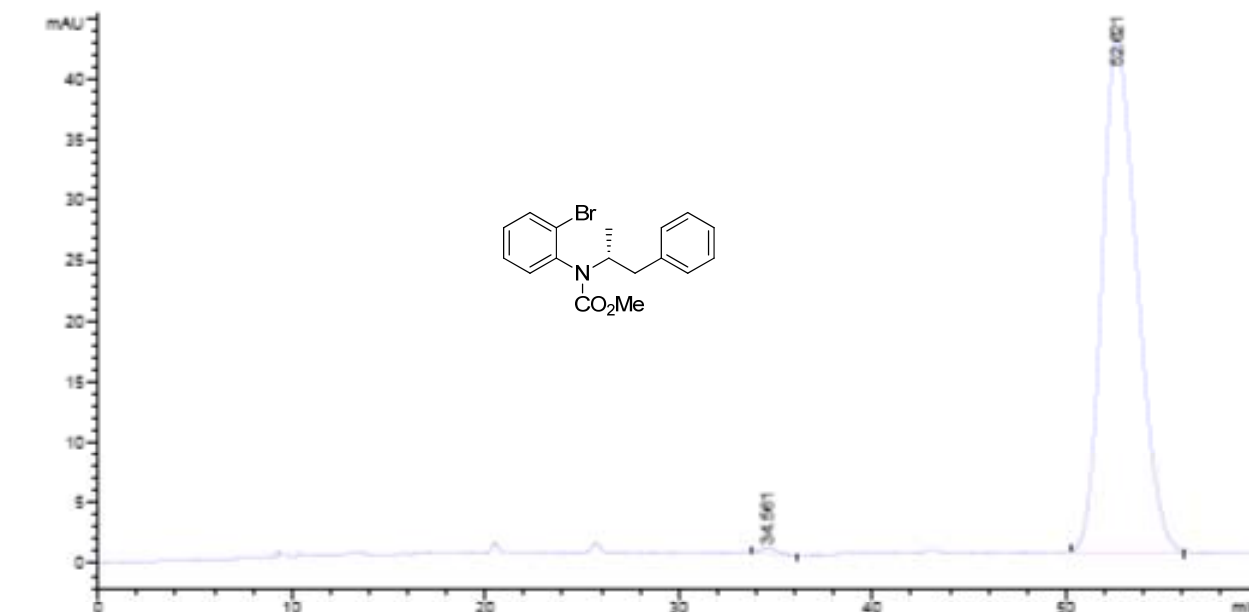

-----  
Area Percent Report  
-----

Sorted By : Signal  
Multiplier : 1.0000  
Dilution : 1.0000  
Use Multiplier & Dilution Factor with ISTDs

Signal 1: DAD1 A, Sig=254,4 Ref=off

| Peak # | RetTime [min] | Type | Width [min] | Area [mAU*s] | Height [mAU] | Area %  |
|--------|---------------|------|-------------|--------------|--------------|---------|
| 1      | 34.561        | BB   | 0.7814      | 31.66782     | 4.82730e-1   | 0.5916  |
| 2      | 52.621        | BB   | 1.8124      | 5321.57129   | 42.27932     | 99.4084 |

Totals : 5353.23911 42.76205

-----  
\*\*\* End of Report \*\*\*  
-----

(S)-methyl (2-bromophenyl)(1-phenylpropan-2-yl)carbamate **6g**:

$[\alpha]_{\text{D}}^{25} = +30.8$  ( $c = 1.0$  in  $\text{CH}_2\text{Cl}_2$ ),  $>99\%$  *ee*, [chiral column: AD-H, *n*-hexane/*i*-PrOH = 99 : 1, 0.5 mL/min, 254 nm;  $t_{\text{R}} = 34.39$  min. (major)].

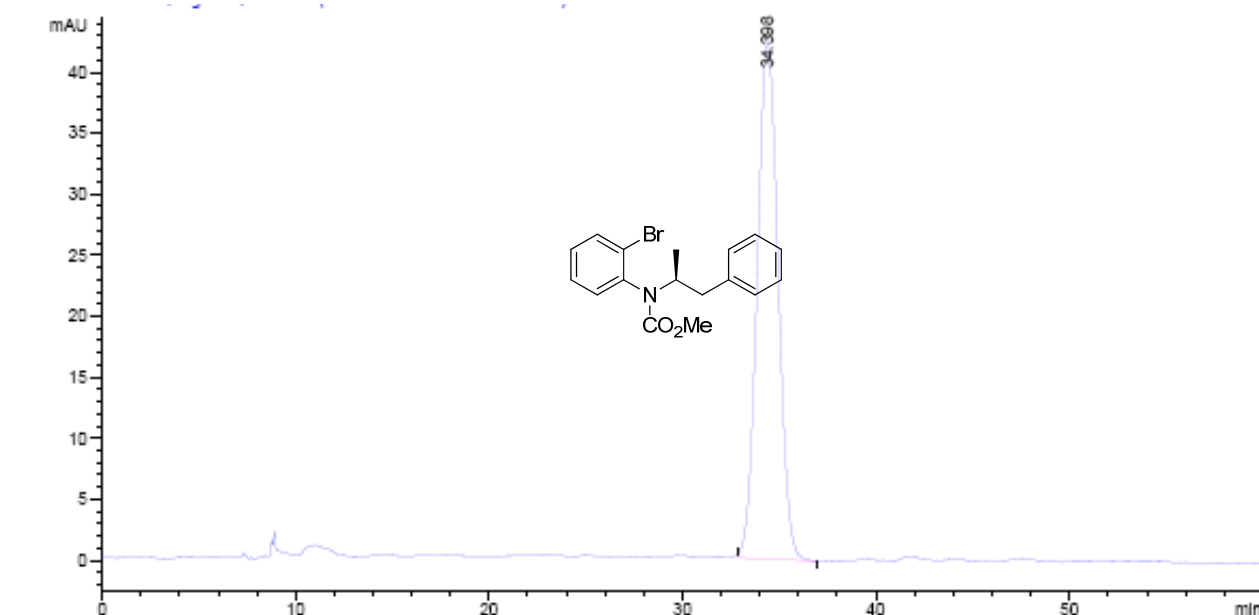

-----  
Area Percent Report  
-----

Sorted By : Signal  
Multiplier : 1.0000  
Dilution : 1.0000  
Use Multiplier & Dilution Factor with ISTDs

Signal 1: DAD1 A, Sig=254,4 Ref=off

| Peak # | RetTime [min] | Type | Width [min] | Area [mAU*s] | Height [mAU] | Area %   |
|--------|---------------|------|-------------|--------------|--------------|----------|
| 1      | 34.398        | BB   | 1.1820      | 3182.51099   | 42.28788     | 100.0000 |

Totals : 3182.51099 42.28788

-----  
\*\*\* End of Report \*\*\*  
-----

### 1.10 Synthesis of (S)-methyl 2-(methoxymethyl)indoline-1-carboxylate 7f:

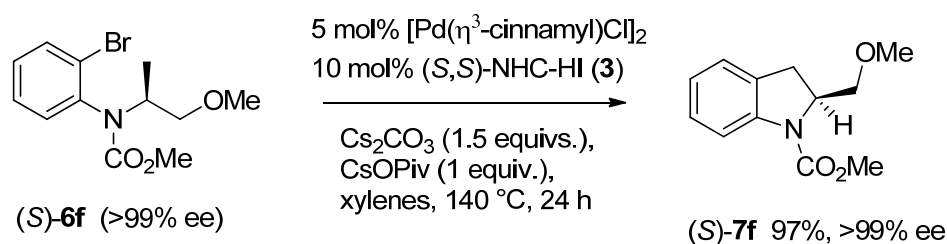

Carbamate (S)-**6f** <sup>[6]</sup> (60.4 mg, 0.2 mmol), cesium carbonate (97.5 mg, 0.3 mmol), [Pd( $\pi$ -cinnamyl)Cl]<sub>2</sub> (5.2 mg, 0.01 mmol), cesium pivalate (46.8 mg, 0.2 mmol) and (S,S)-NHC·HI (**3**) (11.8 mg, 0.02 mmol) were placed in a Schlenk flask. After the flask was evacuated and backfilled with nitrogen, dry xylenes (2 mL) was added under nitrogen. The resulting reaction mixture was stirred at 140 °C in the Schlenk tube behind a protective shield for 24 hours. The

reaction mixture was cooled to r.t. and diluted with dichloromethane (2 mL) followed by filtration through a pad of celite. The filtrate was evaporated by rotary evaporator and the volatiles were removed under vacuum. The residue was purified by f.c.(silica gel; diethyl acetate : pentane = 1 : 30 as eluent) to afford the indoline methyl carbamate (*R*)-**7f** in 97% yield (42.8 mg) and >99% ee [chiral column: AD-H, *n*-hexane/*i*-PrOH = 99 : 1, 0.5 mL/min, 254 nm;  $t_R = 28.44$  min. (major)].

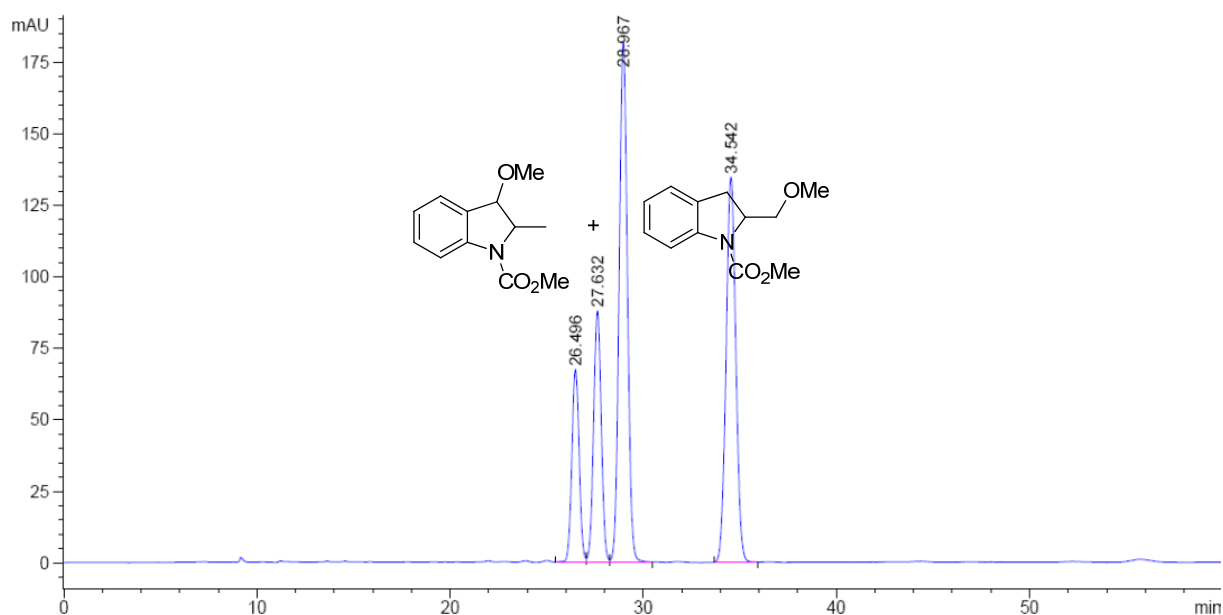



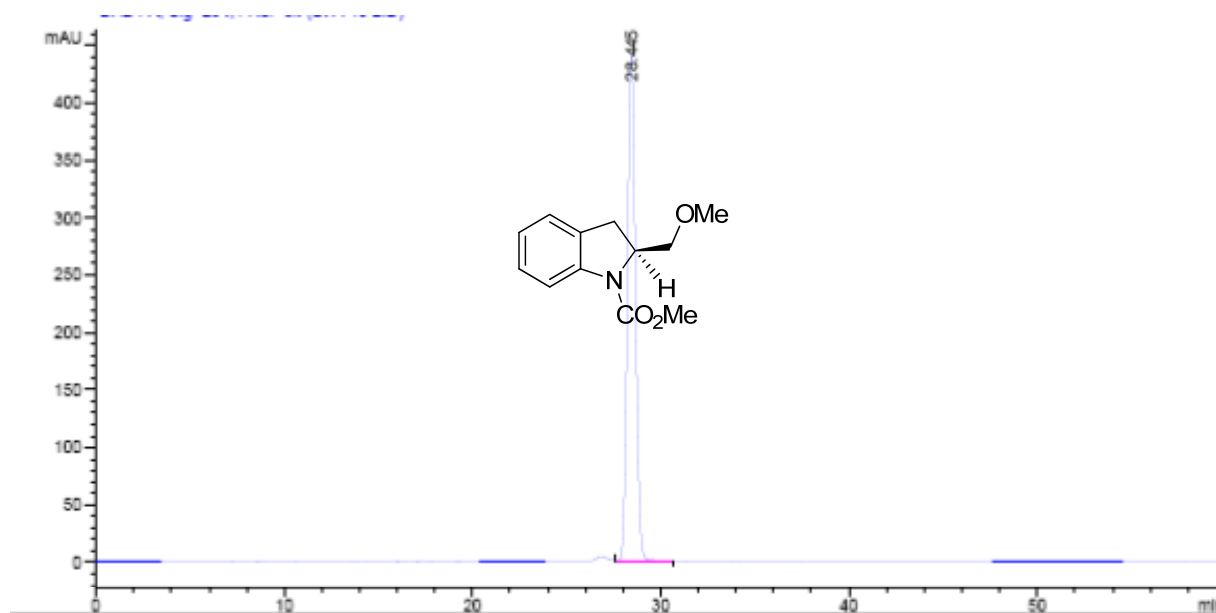

-----  
Area Percent Report  
-----

Sorted By : Signal  
Multiplier : 1.0000  
Dilution : 1.0000  
Use Multiplier & Dilution Factor with ISTDs

Signal 1: DAD1 A, Sig=254,4 Ref=off

| Peak # | RetTime [min] | Type | Width [min] | Area [mAU*s] | Height [mAU] | Area %   |
|--------|---------------|------|-------------|--------------|--------------|----------|
| 1      | 28.445        | VB   | 0.4907      | 1.30570e4    | 439.32993    | 100.0000 |

Totals :                    1.30570e4    439.32993

-----  
\*\*\* End of Report \*\*\*

### 1.11 Synthesis of (2*S*,3*R*)-methyl 3-methoxy-2-methylindoline-1-carboxylate **8f**:

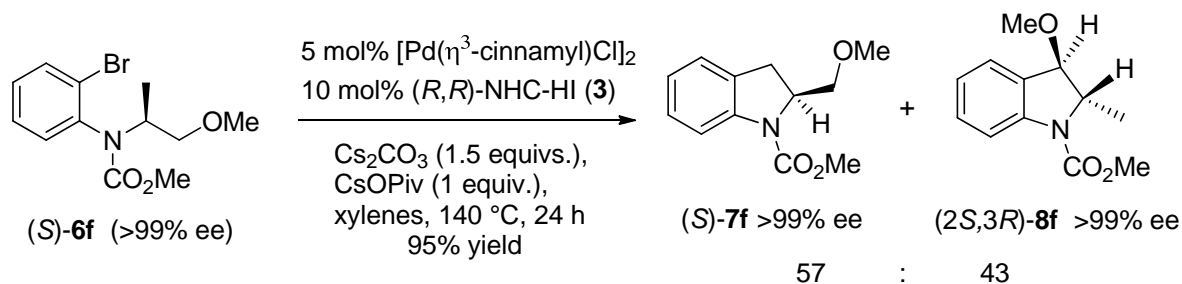

Carbamate (*S*)-**6f** (60.4 mg, 0.2 mmol), cesium carbonate (97.5 mg, 0.3 mmol), [Pd( $\pi$ -cinnamyl)Cl]<sub>2</sub> (5.2 mg, 0.01 mmol), cesium pivalate (46.8 mg, 0.2 mmol) and (*R,R*)-NHC-HI (**3**) (11.8 mg, 0.02 mmol) were placed in a Schlenk flask. After the flask was evacuated and backfilled with nitrogen, dry xylenes (2 mL) was added under nitrogen. The resulting reaction mixture was stirred at 140 °C in the Schlenk tube behind a protective shield for 24 hours. The reaction mixture was cooled to r.t. and diluted with dichloromethane (2 mL) followed by

filtration through a pad of celite. The filtrate was evaporated by rotary evaporator and the volatiles were removed under vacuum. The residue was purified by f.c.(silica gel; diethyl acetate : pentane = 1 : 30 as eluent) to afford the mixture of indolines (*R*)-**7f** (>99% ee) in 54.1 % yield (25.2 mg; yield calcd. by NMR) and (*2S,3R*)-**8f** (>99% ee) in 40.8 % yield (18.1 mg; yield calcd. by NMR).

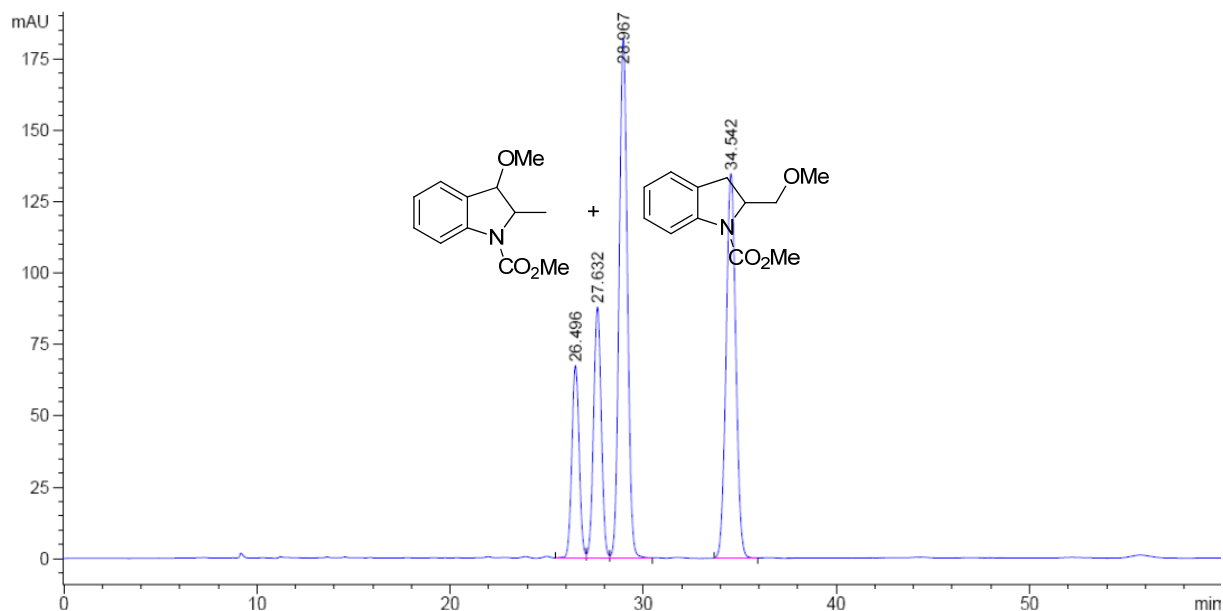

**7f**: >99% ee [chiral column: AD-H, *n*-hexane/*i*-PrOH = 99 : 1, 0.5 mL/min, 254 nm;  $t_R$  = 28.70 min. (major)].

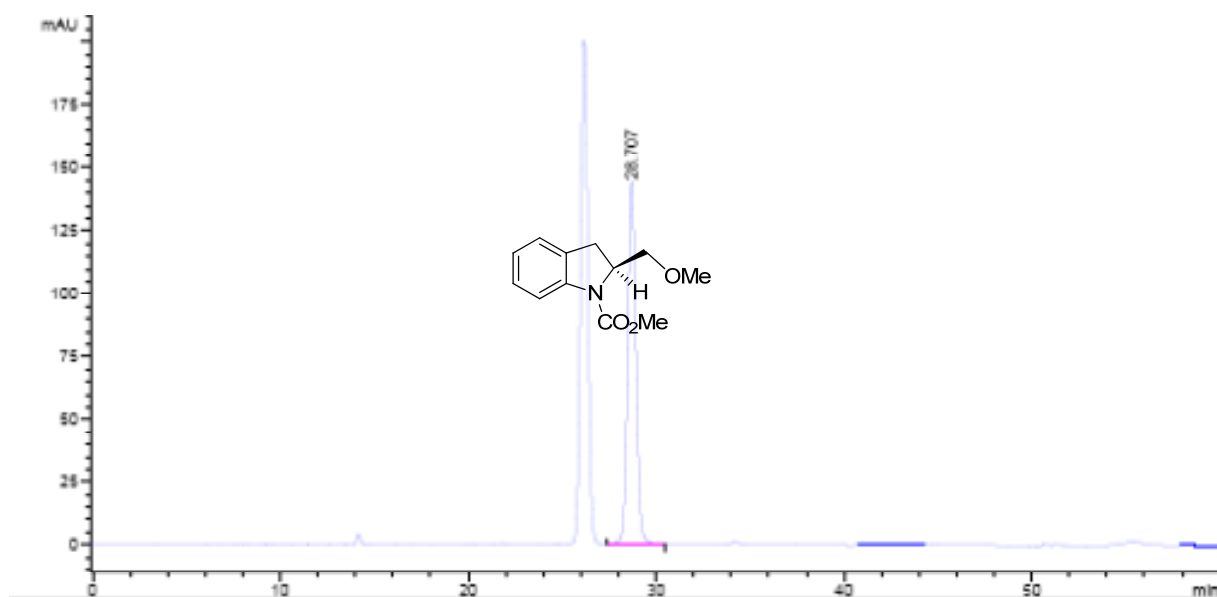

-----  
Area Percent Report  
-----

Sorted By : Signal  
Multiplier : 1.0000  
Dilution : 1.0000  
Use Multiplier & Dilution Factor with ISTDs

Signal 1: DAD1 A, Sig=254,4 Ref=off

| Peak # | RetTime [min] | Type | Width [min] | Area [mAU*s] | Height [mAU] | Area %   |
|--------|---------------|------|-------------|--------------|--------------|----------|
| 1      | 26.707        | VB   | 0.4836      | 4372.61426   | 143.44002    | 100.0000 |

Totals :                    4372.61426   143.44002

-----  
\*\*\* End of Report \*\*\*  
-----

**8f**: >99% *ee* [chiral column: AD-H, *n*-hexane/*i*-PrOH = 99 : 1, 0.5 mL/min, 254 nm;  $t_R$  = 26.17 min. (major)].

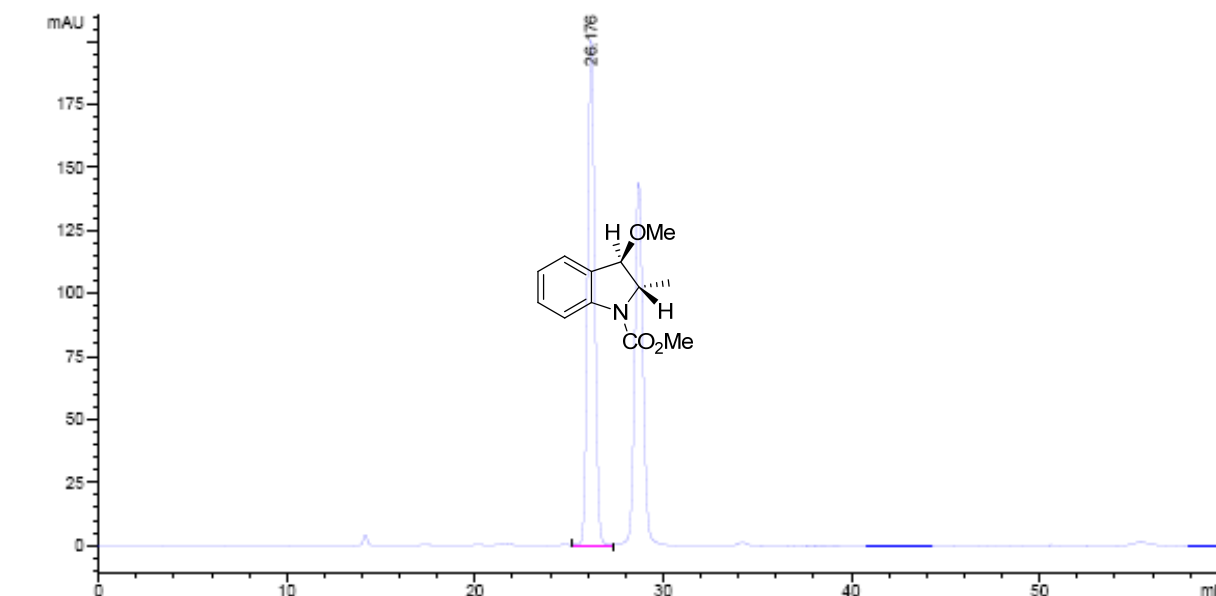

-----  
Area Percent Report  
-----

Sorted By : Signal  
Multiplier : 1.0000  
Dilution : 1.0000  
Use Multiplier & Dilution Factor with ISTDs

Signal 1: DAD1 A, Sig=254,4 Ref=off

| Peak # | RetTime [min] | Type | Width [min] | Area [mAU*s] | Height [mAU] | Area %   |
|--------|---------------|------|-------------|--------------|--------------|----------|
| 1      | 26.176        | VV   | 0.4387      | 5325.93115   | 199.97041    | 100.0000 |

Totals : 5325.93115 199.97041

-----  
\*\*\* End of Report \*\*\*  
-----

### 1.12 Synthesis of (*R*)-methyl 2-benzylindoline-1-carboxylate **7g**:

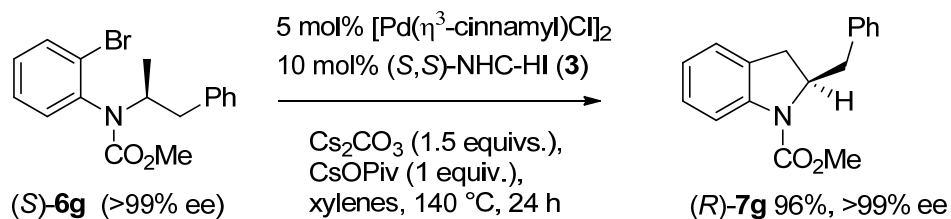

The same procedure as for (*S*)-**7f** applied to the synthesis of (*R*)-**7g**. Carbamate (*S*)-**6g** was used. (*R*)-**7g** formed in 96% yield (51.2 mg), >99% ee [chiral column: AD-H, *n*-hexane/*i*-PrOH = 99 : 1, 0.5 mL/min, 254 nm;  $t_R$  = 36.51 min. (major)].

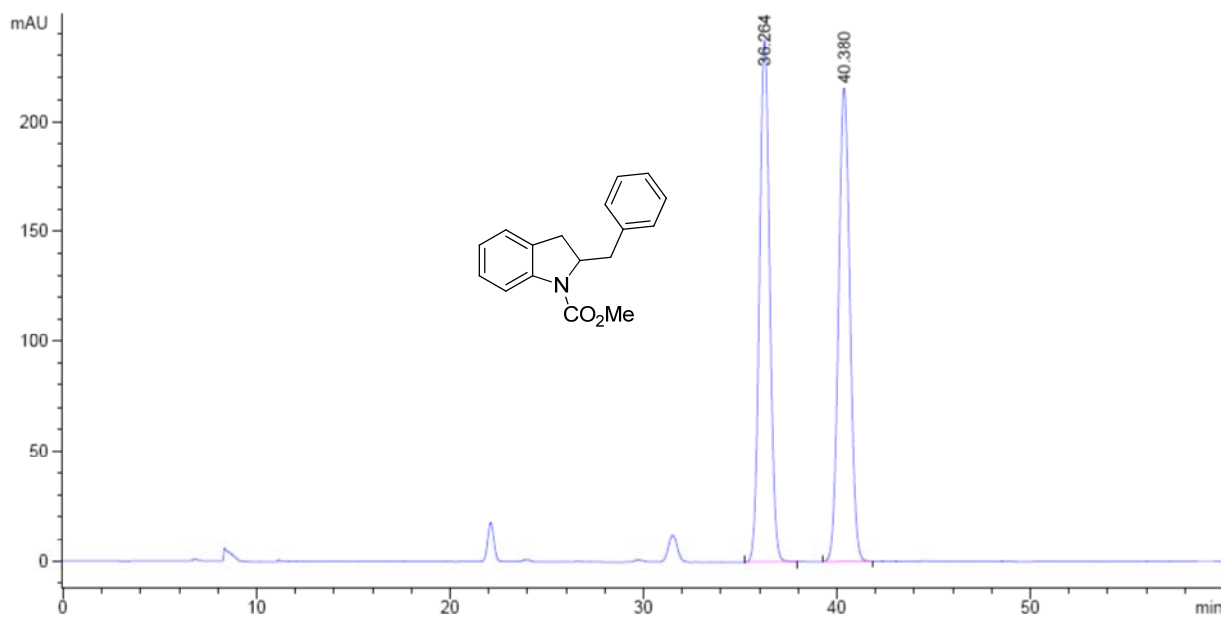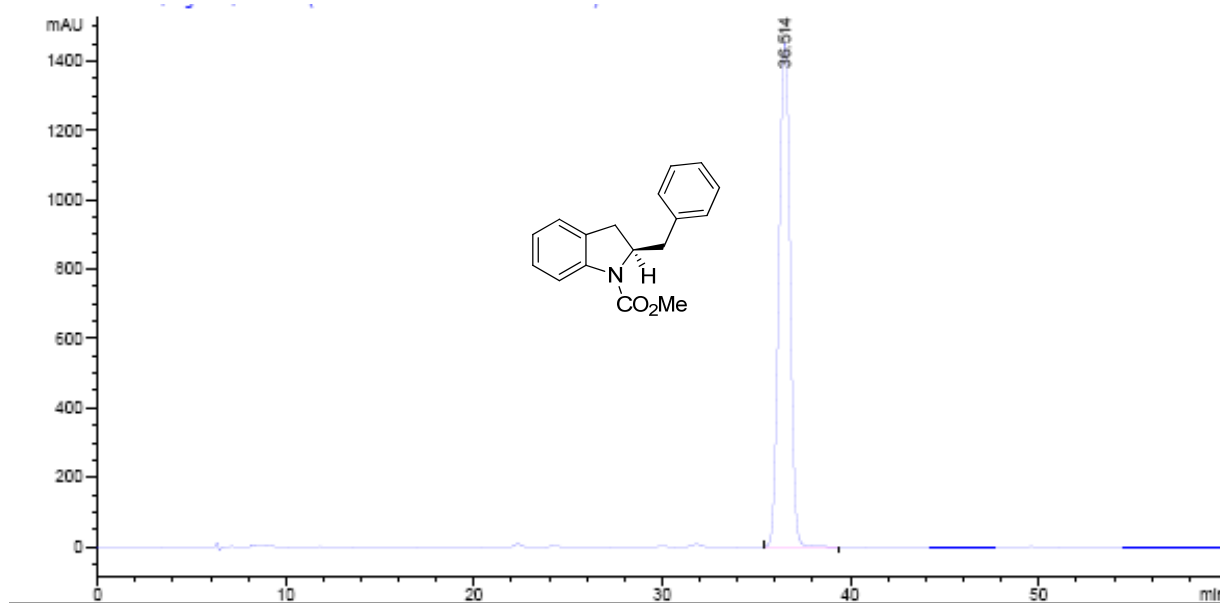

-----  
Area Percent Report  
-----

Sorted By : Signal  
Multiplier : 1.0000  
Dilution : 1.0000  
Use Multiplier & Dilution Factor with ISTDs

Signal 1: DAD1 A, Sig=254,4 Ref=off

| Peak # | RetTime [min] | Type | Width [min] | Area [mAU*s] | Height [mAU] | Area %   |
|--------|---------------|------|-------------|--------------|--------------|----------|
| 1      | 36.514        | BB   | 0.6576      | 5.98873e4    | 1450.77393   | 100.0000 |

Totals : 5.98873e4 1450.77393

-----  
\*\*\* End of Report \*\*\*  
-----

### 1.13 Synthesis of (2*R*,3*S*)-methyl 2-methyl-3-phenylindoline-1-carboxylate **8g**:

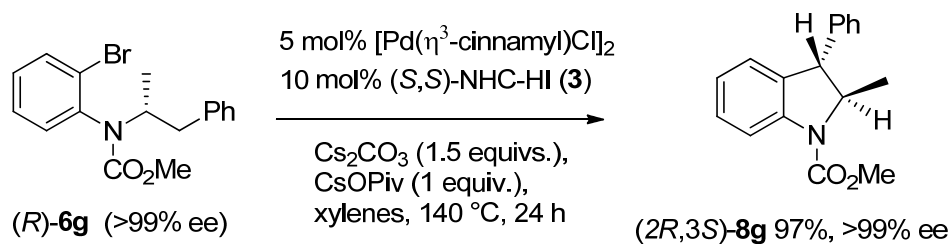

The same procedure as for (2*S*,3*R*)-**8f** applied to the synthesis of (2*R*,3*S*)-**8g**. Carbamate (R)-**6g** was used. (2*R*,3*S*)-**8g** formed in 97% yield (51.8 mg), >99% ee [chiral column: AD-H, *n*-hexane/*i*-PrOH = 99 : 1, 0.5 mL/min, 254 nm; *t*<sub>R</sub> = 31.71 min. (major)].

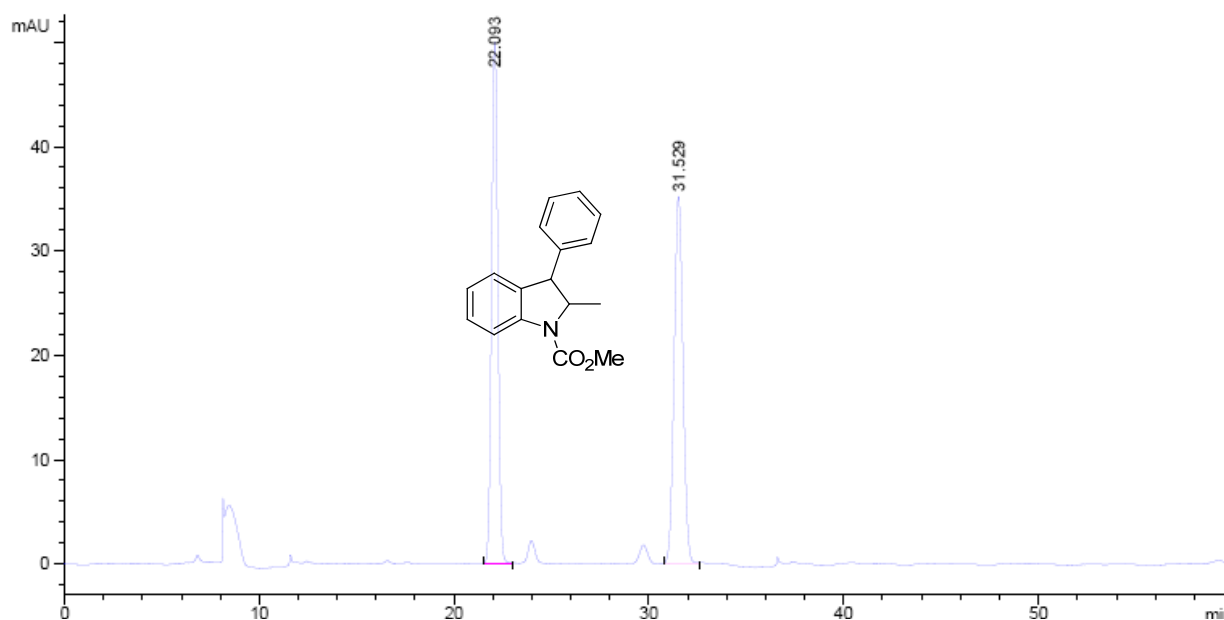

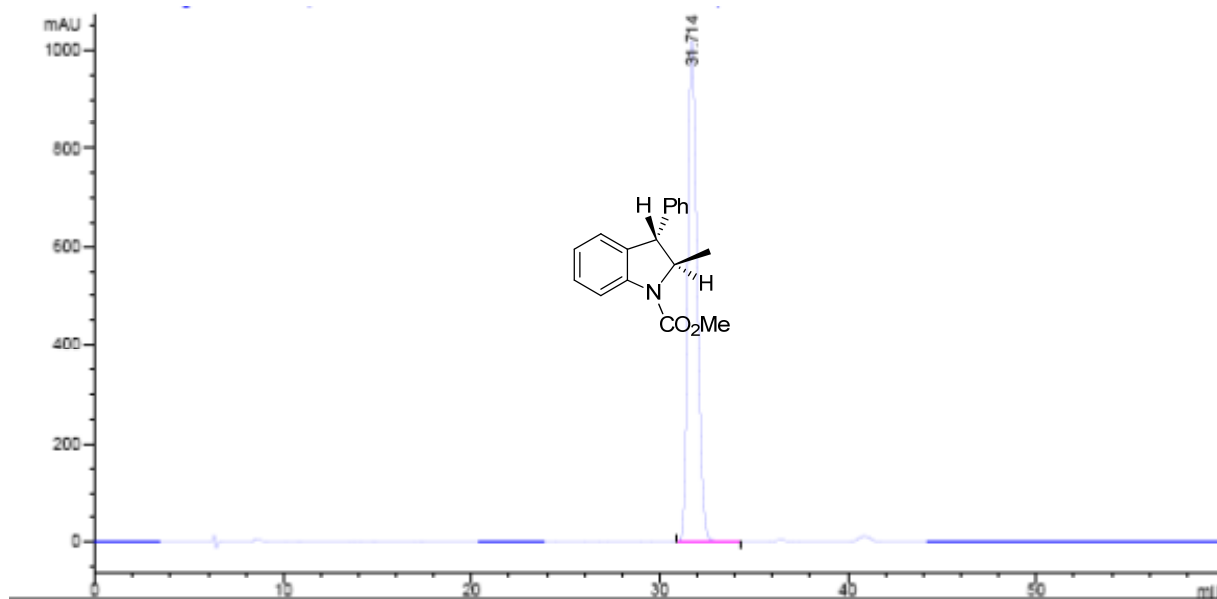

-----  
Area Percent Report  
-----

Sorted By : Signal  
Multiplier : 1.0000  
Dilution : 1.0000  
Use Multiplier & Dilution Factor with ISTDs

Signal 1: DAD1 A, Sig=254,4 Ref=off

| Peak # | RetTime [min] | Type | Width [min] | Area [mAU*s] | Height [mAU] | Area %   |
|--------|---------------|------|-------------|--------------|--------------|----------|
| 1      | 31.714        | BB   | 0.5662      | 3.54306e4    | 1017.71436   | 100.0000 |

Totals : 3.54306e4 1017.71436

-----  
\*\*\* End of Report \*\*\*  
-----

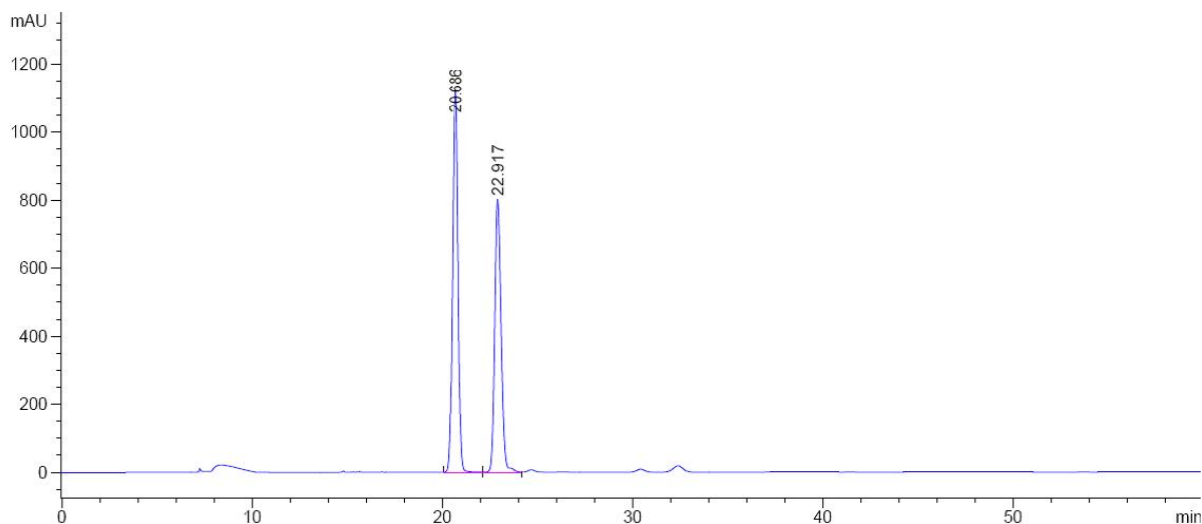

**(2*R*,3*S*)-2-methyl-3-phenylindoline (9):**

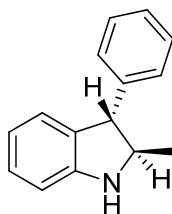

To a solution of (*2R,3S*)-**8g** (53.4 mg, 0.2 mmol, 1 equiv.) in THF/MeOH (2.5 mL/ 5 mL) was added 5N-NaOH aq. (2 mL, 10 mmol, 50 equivs). This mixture was refluxed for 24 hours. After cooling to r.t. it was extracted with CH<sub>2</sub>Cl<sub>2</sub>. The combined organic phases were dried over Na<sub>2</sub>SO<sub>4</sub>. After filtration and evaporation the crude residue was purified by flash column chromatography (silica gel; eluent: ethyl acetate:pentane = 1:20) affording indoline **9** as a colorless oil in 92% yield (38.4 mg, )

$[\alpha]_D^{20} = +35.0$  ( $c = 0.5$  in CH<sub>2</sub>Cl<sub>2</sub>). >99% *ee*, [chiral column, AD-H, *n*-hexane/*i*-PrOH = 99:1, 0.5 mL/min, 254 nm,  $t_R = 20.36$  min. (major)]. <sup>1</sup>H NMR (400 MHz, CDCl<sub>3</sub>): 1.31 (d,  $J = 6.0$  Hz, 3H), 3.84 (q,  $J = 5.9$  Hz, 1H), 3.92 (d,  $J = 9.6$  Hz, 1H), 6.65-6.69 (m, 2H), 6.79-6.82 (m, 2H), 7.70 (tt,  $J = 7.6, 1.0$  Hz, 1H), 7.22-7.26 (m, 2H), 7.29-7.33 (m, 2H). <sup>13</sup>C NMR (100 MHz)  $\delta$  20.5, 57.2, 65.6, 109.5, 119.2, 125.1, 127.0, 127.9, 128.7, 128.9, 132.6, 142.8, 151.0. IR (neat, cm<sup>-1</sup>): 3364, 3028, 2963, 2854, 1732, 1605, 1482, 1464, 1375, 1245, 1214, 1017, 746, 698. HRMS (EI): calcd. for C<sub>18</sub>H<sub>19</sub>N<sub>2</sub>O ([M+H]<sup>+</sup>): 210.1277, found: 210.1280.



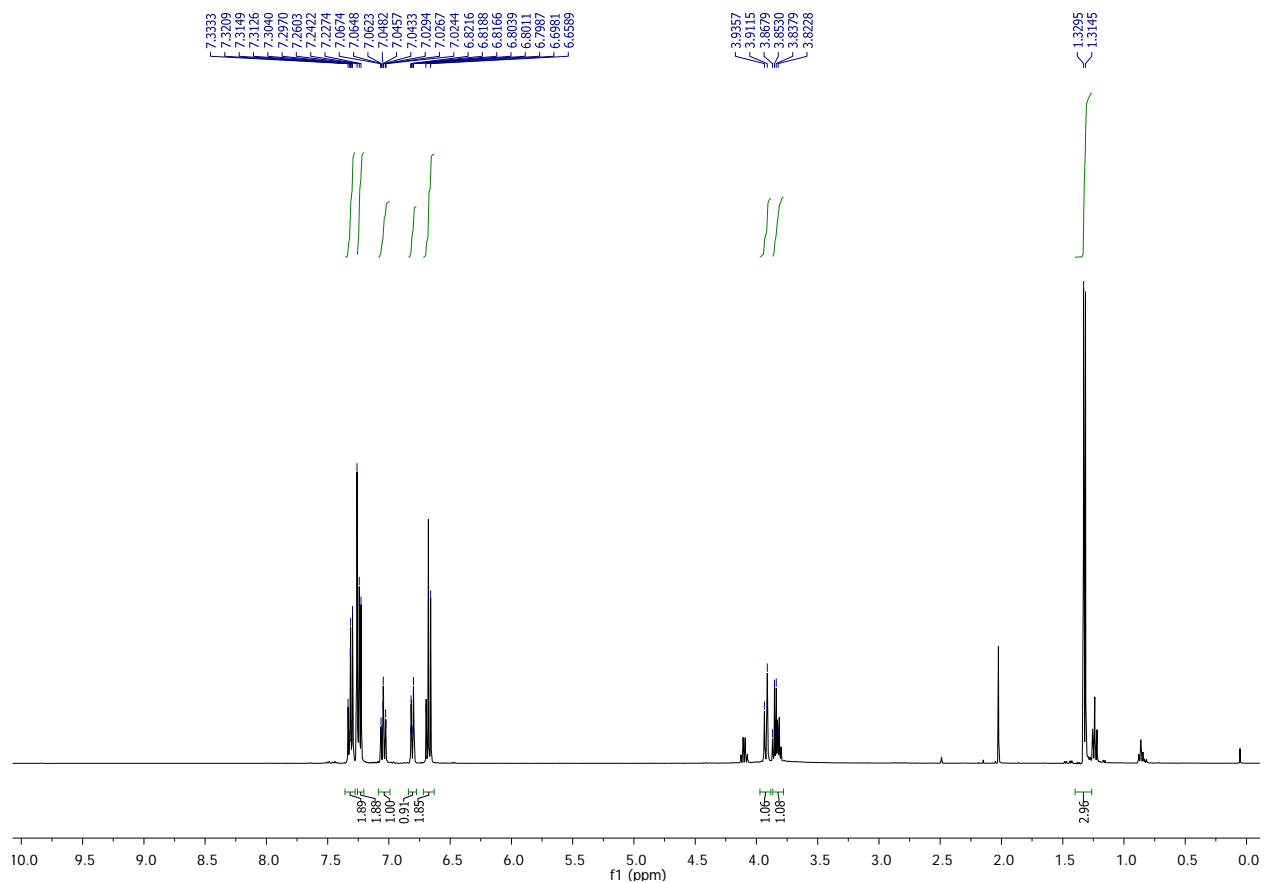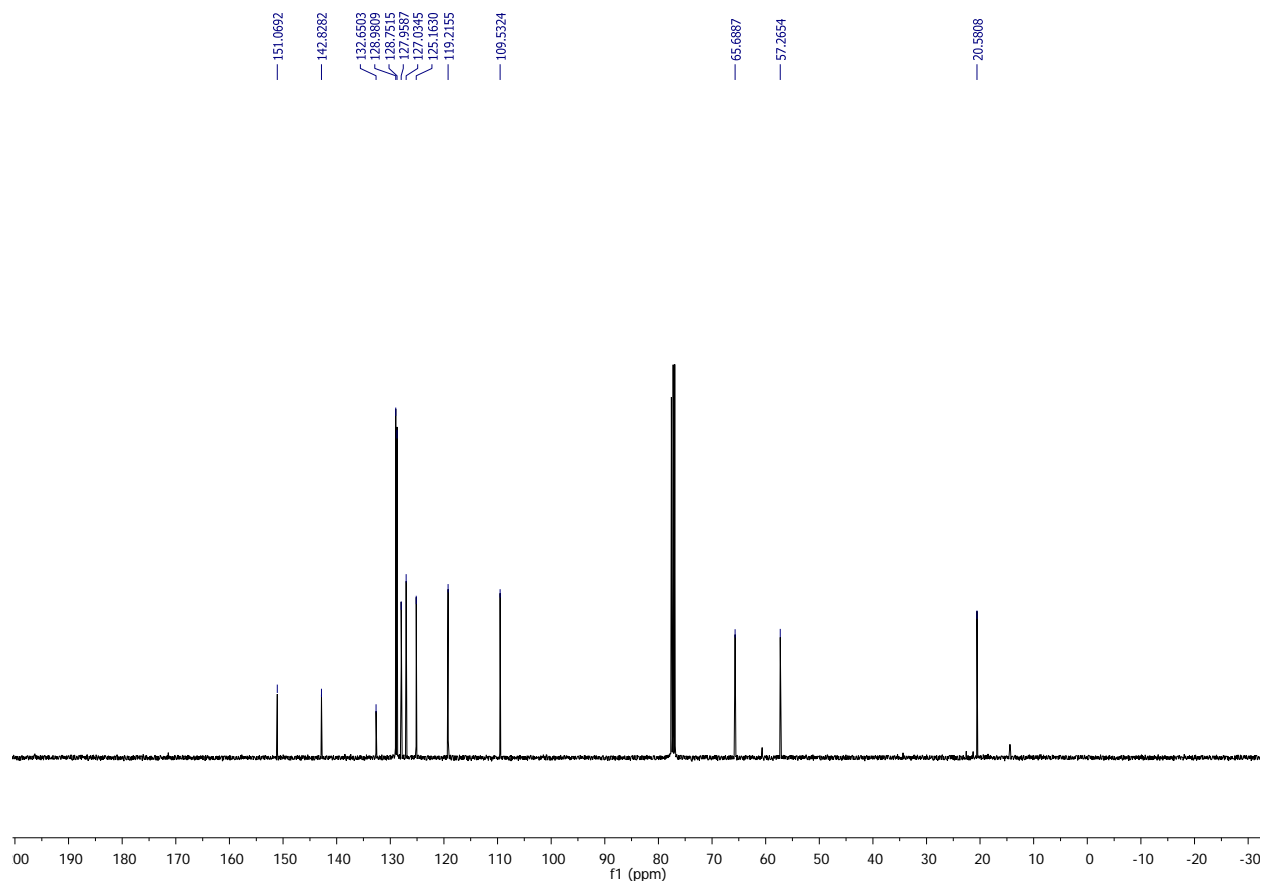

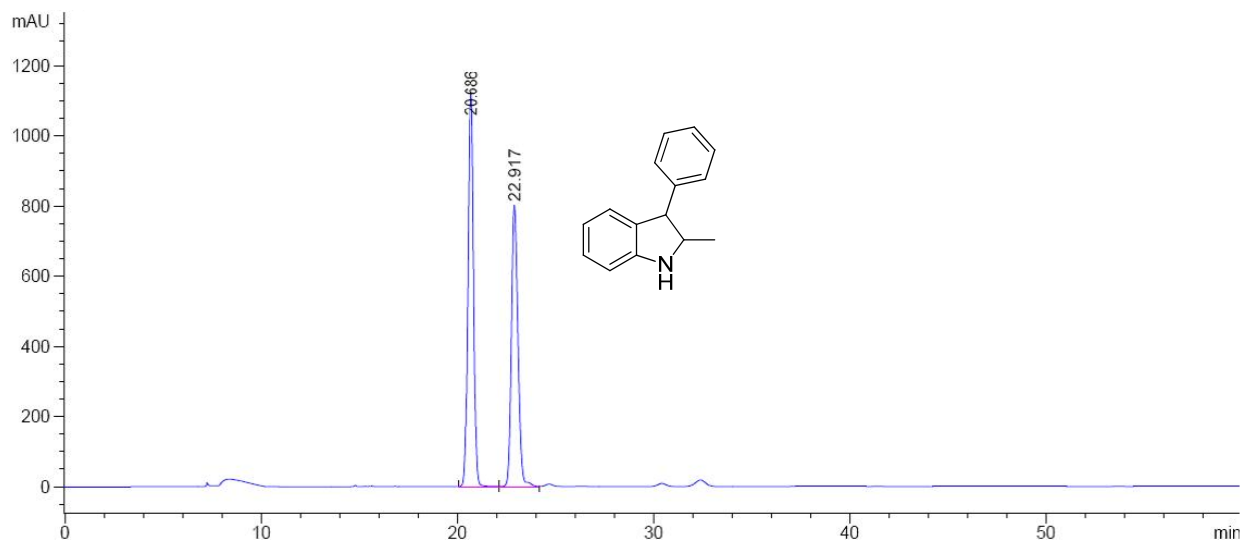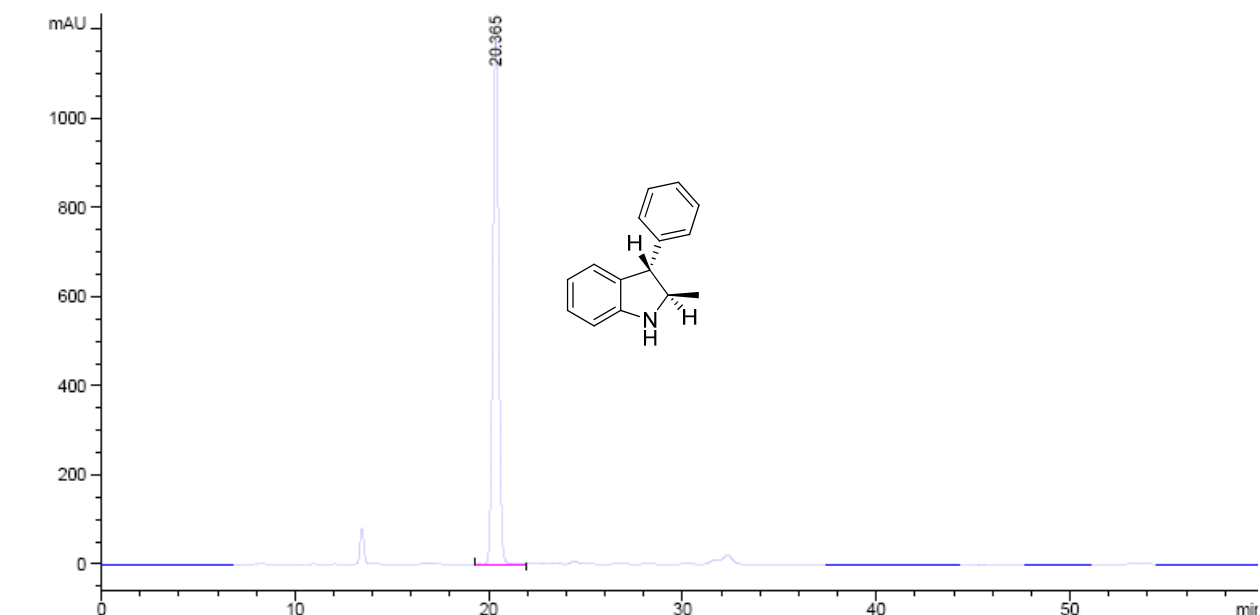

=====  
Area Percent Report  
=====

Sorted By : Signal  
Multiplier : 1.0000  
Dilution : 1.0000  
Use Multiplier & Dilution Factor with ISTDs

Signal 1: DAD1 A, Sig=254,4 Ref=off

| Peak # | RetTime [min] | Type | Width [min] | Area [mAU*s] | Height [mAU] | Area %   |
|--------|---------------|------|-------------|--------------|--------------|----------|
| 1      | 20.365        | BB   | 0.3408      | 2.43212e4    | 1159.14490   | 100.0000 |

Totals : 2.43212e4 1159.14490

=====  
\*\*\* End of Report \*\*\*  
=====

### 1.15 IR and vibrational circular dichroism (VCD) spectra:

IR and vibrational circular dichroism (VCD) spectra were recorded on a Bruker PMA 50 accessory coupled to a Tensor 27 Fourier transform infrared spectrometer. A photoelastic modulator (Hinds PEM 90) set at 1/4 retardation was used to modulate the handedness of the circular polarized light. Demodulation was performed by a lock-in amplifier (SR830 DSP). An optical low-pass filter ( $< 1800\text{ cm}^{-1}$ ) in front of the photoelastic modulator was used to enhance the signal/noise ratio. Solutions of ca. 10 mg in 500  $\mu\text{l}$   $\text{CD}_2\text{Cl}_2$  were prepared and measured in a cell equipped with  $\text{CaF}_2$  windows and a 130  $\mu\text{m}$  spacer. The neat solvent served as the reference. For both the sample and reference 8400 scans at  $4\text{ cm}^{-1}$  resolution were averaged.

*Computational methods.* Density functional theory (DFT) as implemented in Gaussian03 was used to study the structure of **2a** and **8g** and to calculate the corresponding IR and VCD spectra. (ref Gaussian) The calculations were performed using the b3lyp functional (ref A.D. Becke, J.Chem.Phys. 98 (1993) 5648-5652, C. Lee, W. Yang, R.G. Parr, Phys. Rev. B 37 (1988) 785-789.) and a 6-31G(d) basis set. (ref: R. Ditchfield, W. J. Hehre, and J. A. Pople, J. Chem. Phys. 54 (1971) 724). Prior to the calculation of the spectra all degrees of freedom were completely relaxed. IR and VCD spectra were constructed from calculated dipole and rotational strengths using the GaussView program.<sup>[7]</sup>

### Discussion of results:

VCD spectroscopy was used to determine the stereochemistry of the indolines **2a** and **8g**. For both compounds four isomers are possible, corresponding to the *cis* and *trans* arrangement of the two substituents and the corresponding enantiomers. In addition one has to consider conformational freedom. For the phenyl-methyl compound two conformers are possible corresponding to the arrangement of the ester group. For the methyl-ethyl compound

additionally three positions are feasible for the ethyl group leading to a total of six conformers for each stereoisomer. All the conformers were calculated. The discussion presented here is however based only on the most stable conformer of the corresponding compound. A more detailed discussion will be given elsewhere.

#### Indoline **2a**:

The IR and VCD spectra of the *cis* and *trans* compound are quite similar, particularly for the carbonyl vibration, the weak band measure around  $1600\text{ cm}^{-1}$  and the group of bands slightly below  $1500\text{ cm}^{-1}$  (calculated slightly above  $1500\text{ cm}^{-1}$ ). A clear distinction is possible based on the strong band measure at around  $1400\text{ cm}^{-1}$  (calculated at  $1460\text{ cm}^{-1}$ ). For the *cis* compound this band is calculated positive in the VCD and has opposite phase as the carbonyl band. For the *trans* this band is calculated strongly negative and has the same phase as the carbonyl band, as is observed in the experiment. In the experiment there is a positive band at  $1460$ , which is due to another conformer.

Conclusion: Analysis of the VCD spectra strongly indicates that the measured compound corresponds to the *trans* compound and the enantiomer corresponds to the one considered in the calculation.

#### Indoline **8g**:

The IR and VCD spectra of the *cis* and *trans* compound are again quite similar. Also in this case the region around the strong band measure slightly below  $1400\text{ cm}^{-1}$  (calculated slightly above  $1400\text{ cm}^{-1}$ ) is most conclusive. For the *cis* there are positive and negative bands, whereas for the *trans* only strong negative bands are calculated. The experiment reveals two strong positive bands, where the stronger one corresponds to a relatively weak band in the IR. This is a strong indication for the *trans* configuration. Furthermore, for the *cis* a relatively strong carbonyl band in the VCD is predicted, in contrast to the experiment. The

bands calculated for the *trans* have opposite sign compared to the measured spectrum, which shows that the enantiomer considered in the calculation has opposite absolute configuration with respect to the measured compound.

Conclusion: Analysis of the VCD spectra strongly indicates that the measured compound corresponds to the *trans* compound and the enantiomer measured has opposite absolute configuration with respect to the one calculated.

Indoline **2a**:  
Experimental spectra

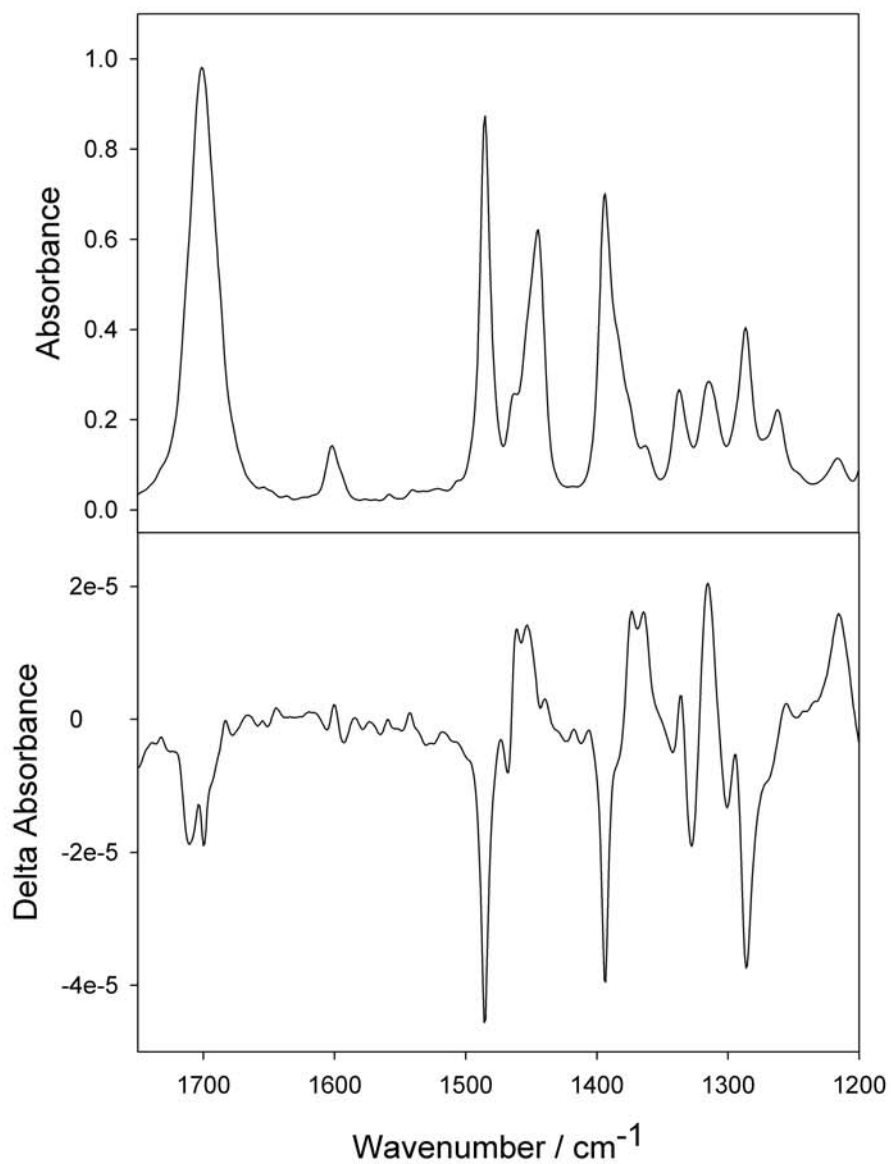

(2*S*,3*R*)-methyl 2-ethyl-3-methylindoline-1-carboxylate **2a**:

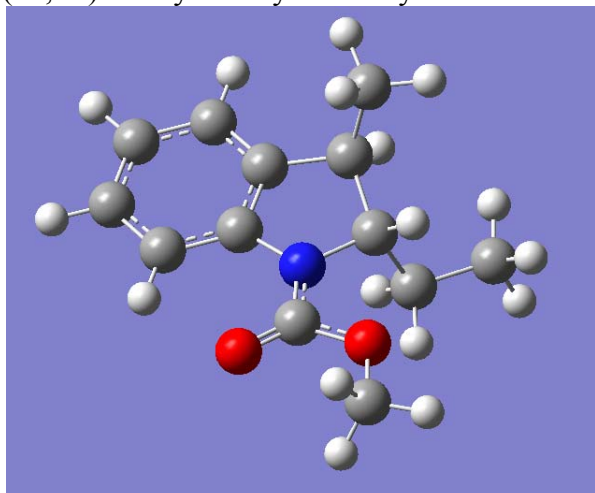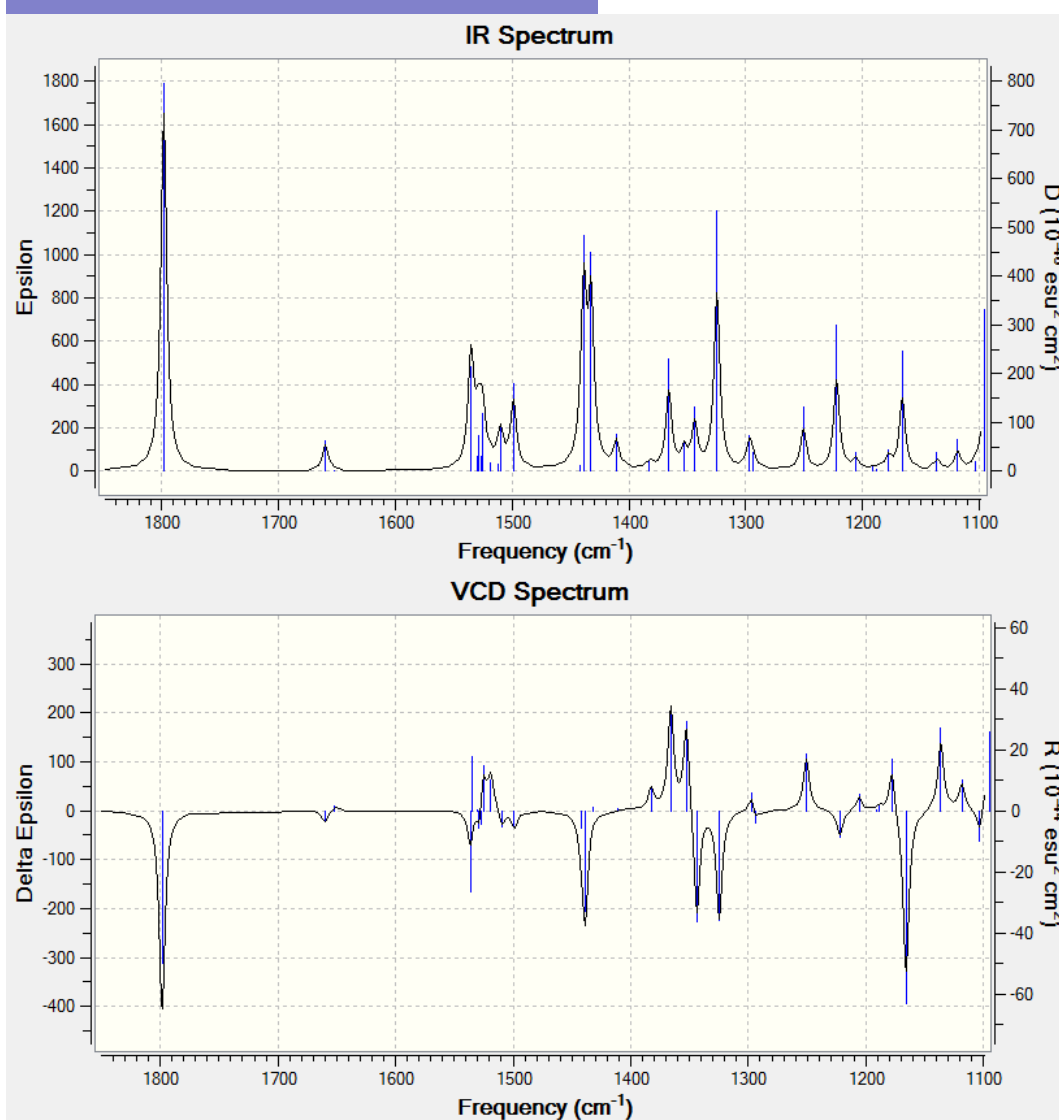

(2*S*,3*S*)-methyl 2-ethyl-3-methylindoline-1-carboxylate **2a**:

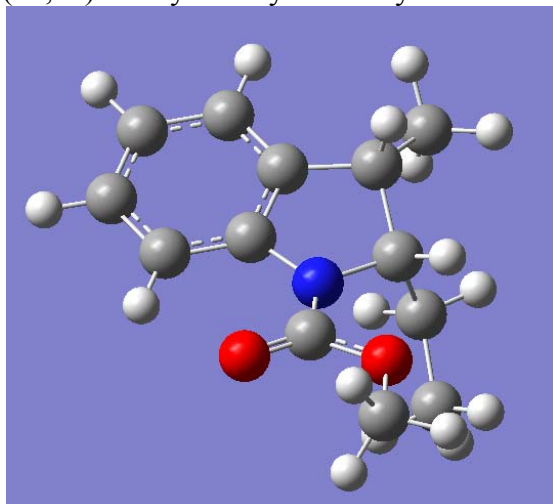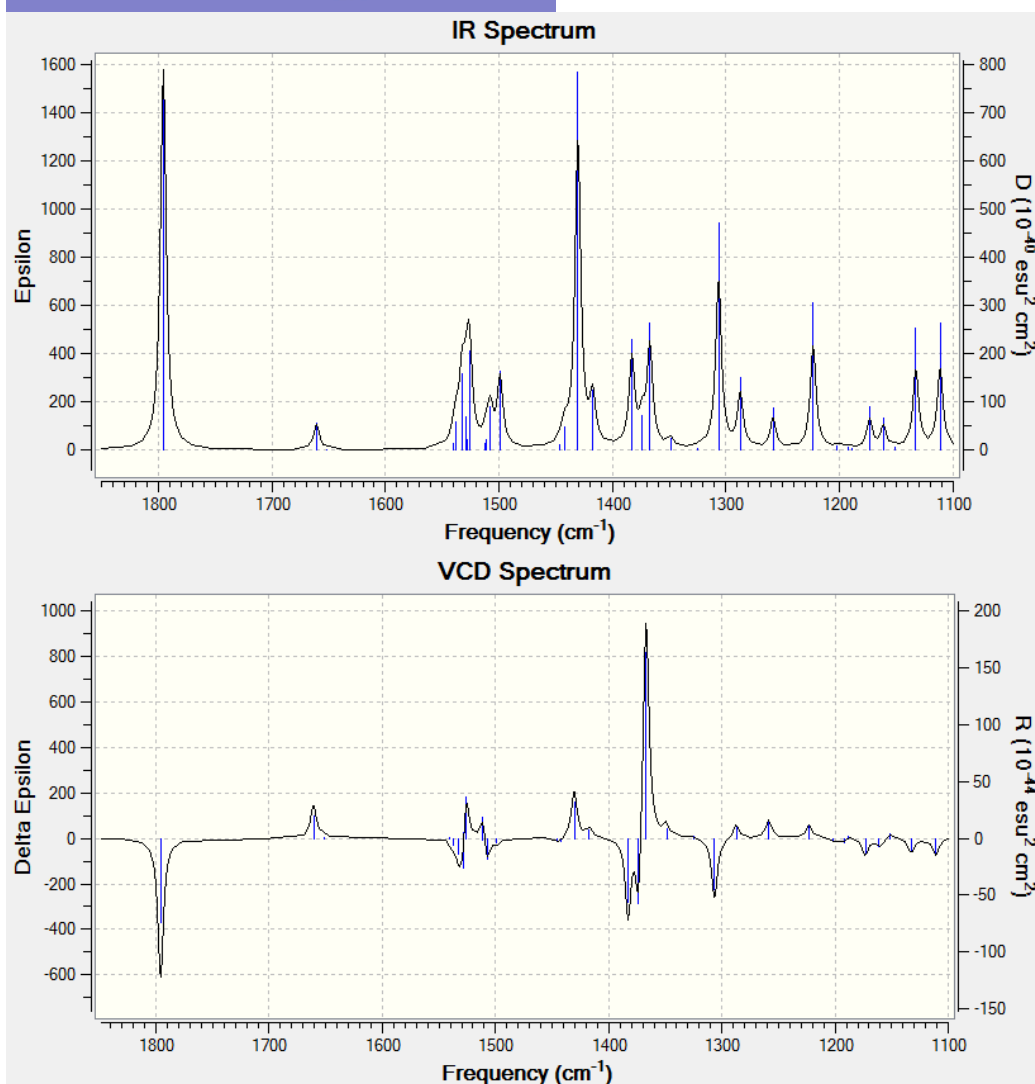



Indoline **8g**:  
Experimental spectra

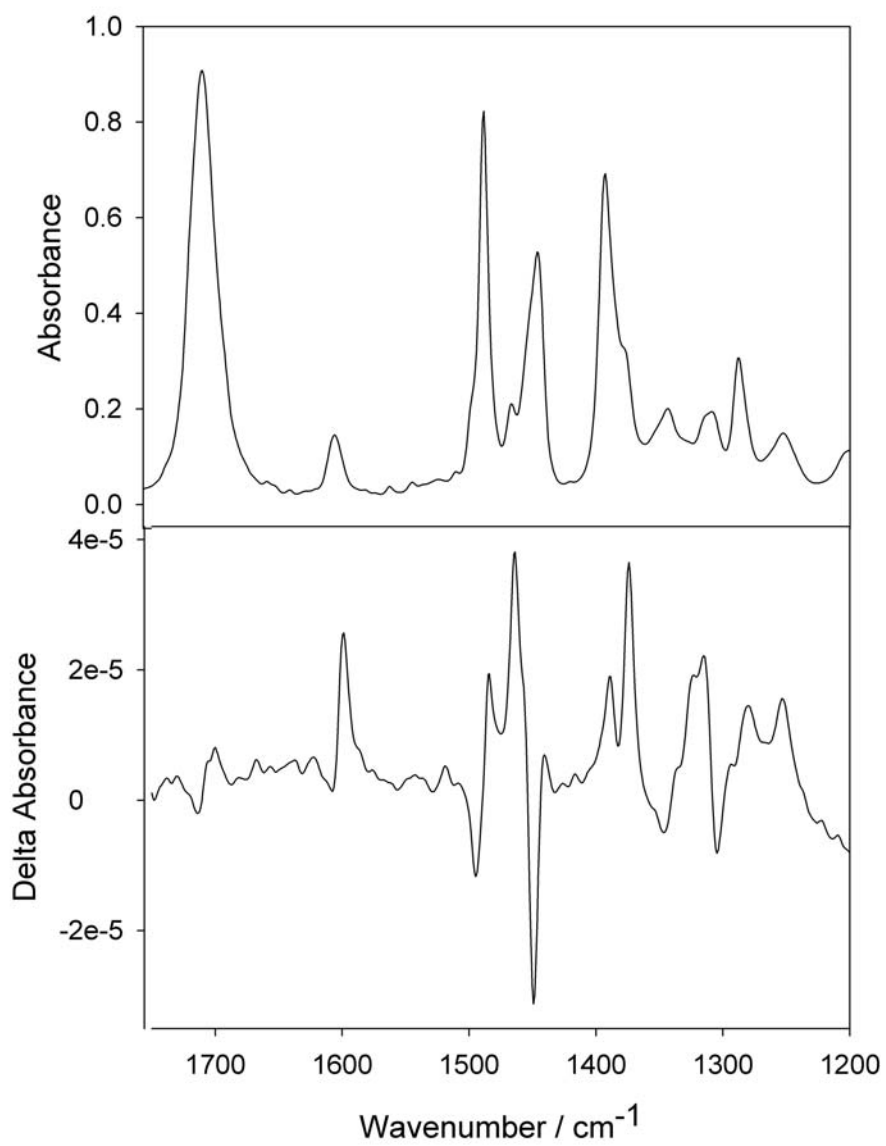

(2*S*,3*R*)-methyl 2-methyl-3-phenylindoline-1-carboxylate **8g**:

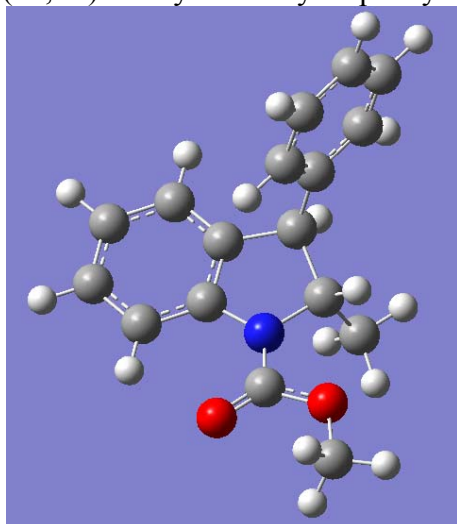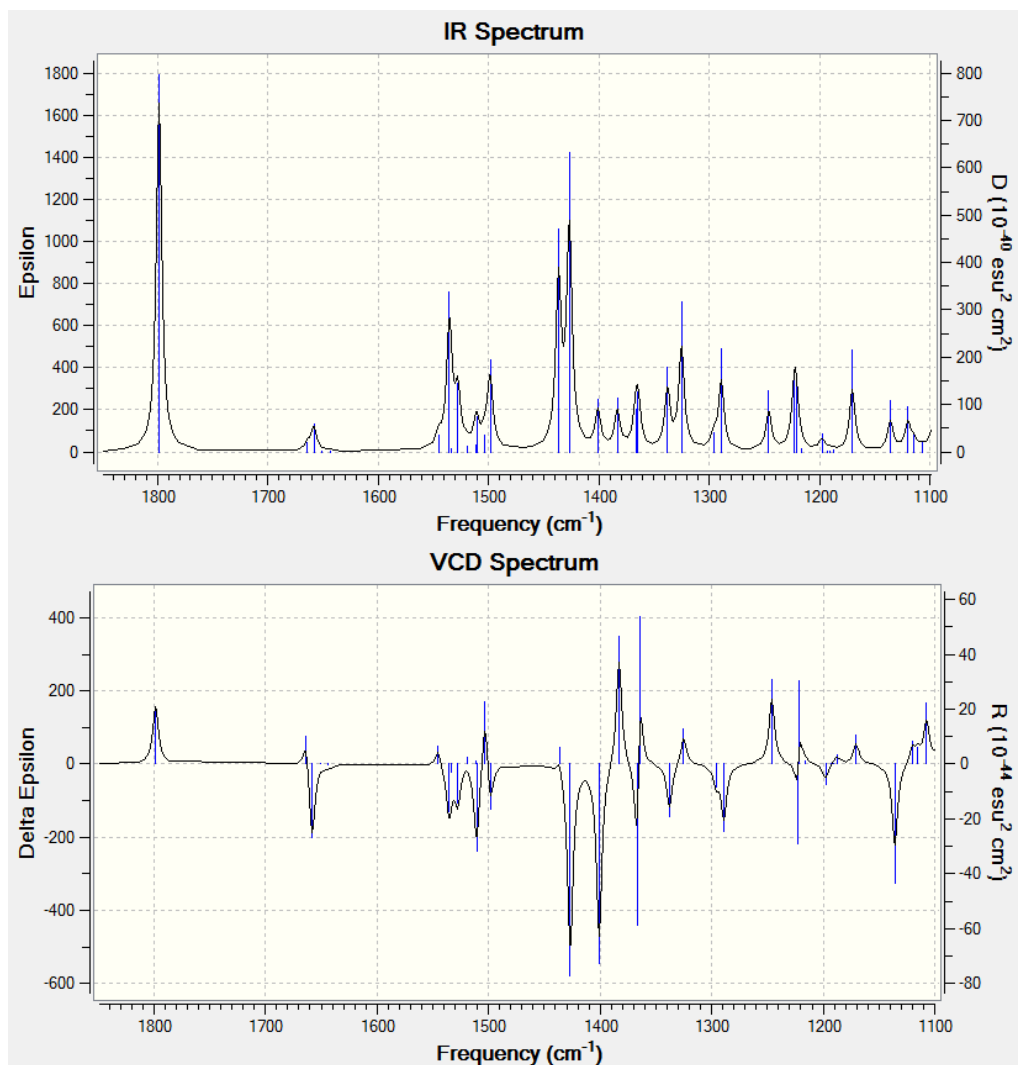

(2*R*,3*R*)-methyl 2-methyl-3-phenylindoline-1-carboxylate **8g**:

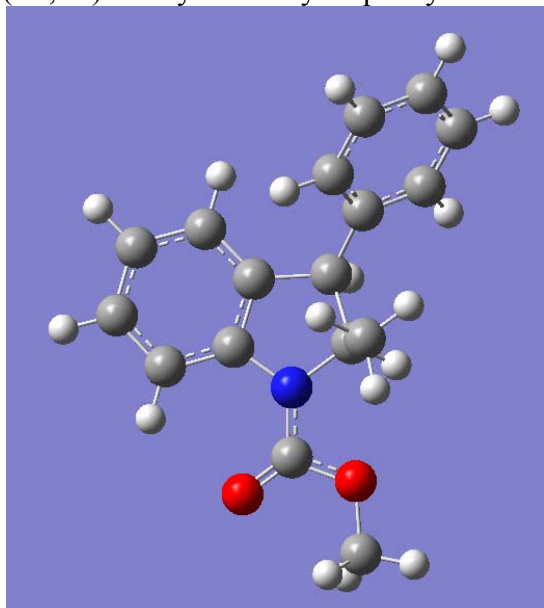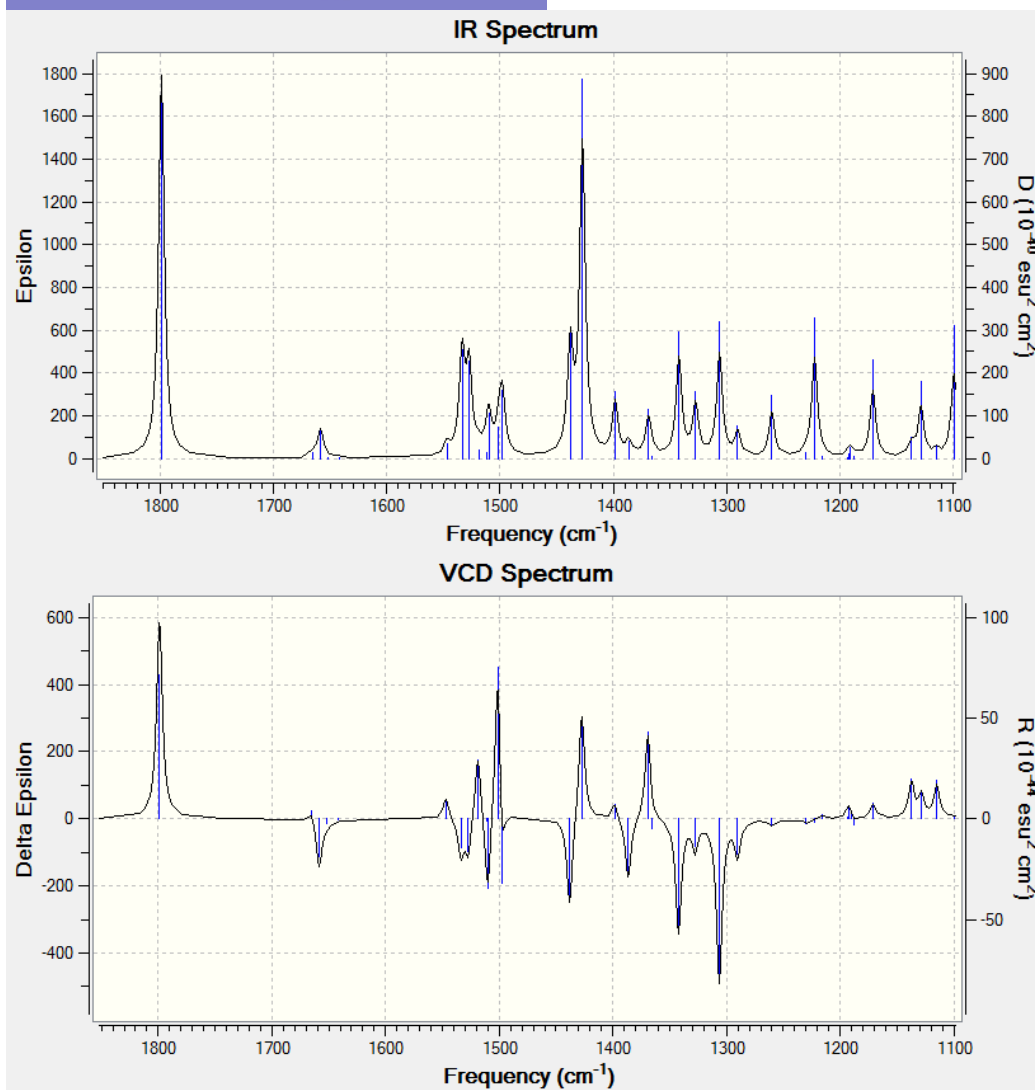

### 1.16 References:

- [1] D. J. Cho, C. J. Wu, Sujith S, W. –S. Han, S. O. Kang, and B. Y. Lee, *Organometallics* **2006**, *25*, 2133-2134.
- [2] F. M. Rivas, U. Riaz, A. Giessert, J. A. Smulik, S. T. Diver, *Org. Lett.* **2001**, *3*, 2673-2676.
- [3] T. Watanabe, S. Oishi, N. Fujii, H. Ohno, *Org. Lett.* **2008**, *10*, 1759-1762.
- [4] H. V. Bailey, W. Heaton, N. Vicker, B. V. L. Potter, *Synlett*, **2006**, 2444-2448.
- [5] G. Buenger, J. Douglas, P. Jass, E. Michalson, M. Schiesher US 2009/0292143A1 and references therein.
- [6] Carbamate (*S*)-**6f** synthesized by similar procedure as for *rac*-**6f** starting from enantiopure commercially available (*S*)-1-methoxypropan-2-amine.
- [7] Gaussian 03, Revision C.01, M. J. Frisch, G. W. Trucks, H. B. Schlegel, G. E. Scuseria, M. A. Robb, J. R. Cheeseman, J. A. Montgomery, Jr., T. Vreven, K. N. Kudin, J. C. Burant, J. M. Millam, S. S. Iyengar, J. Tomasi, V. Barone, B. Mennucci, M. Cossi, G. Scalmani, N. Rega, G. A. Petersson, H. Nakatsuji, M. Hada, M. Ehara, K. Toyota, R. Fukuda, J. Hasegawa, M. Ishida, T. Nakajima, Y. Honda, O. Kitao, H. Nakai, M. Klene, X. Li, J. E. Knox, H. P. Hratchian, J. B. Cross, V. Bakken, C. Adamo, J. Jaramillo, R. Gomperts, R. E. Stratmann, O. Yazyev, A. J. Austin, R. Cammi, C. Pomelli, J. W. Ochterski, P. Y. Ayala, K. Morokuma, G. A. Voth, P. Salvador, J. J. Dannenberg, V. G. Zakrzewski, S. Dapprich, A. D. Daniels, M. C. Strain, O. Farkas, D. K. Malick, A. D. Rabuck, K. Raghavachari, J. B. Foresman, J. V. Ortiz, Q. Cui, A. G. Baboul, S. Clifford, J. Cioslowski, B. B. Stefanov, G. Liu, A. Liashenko, P. Piskorz, I. Komaromi, R. L. Martin, D. J. Fox, T. Keith, M. A. Al-Laham, C. Y. Peng, A. Nanayakkara, M. Challacombe, P. M. W. Gill, B. Johnson, W. Chen, M. W. Wong, C. Gonzalez, and J. A. Pople, Gaussian, Inc., Wallingford CT, 2004.
